# Supplementary material for: Chemical Synergy between Ionophore PBT2 and Zinc Reverses Antibiotic Resistance
Source: PubMed Central journal article supplement (PMC6299484; doi:10.1128/mbio.02391-18), 2018-12-11

# Supplementary Figure 1

**a**

IE1294.257.fid  
IE1294-100  
CDCI3  
IE1294 #257-60

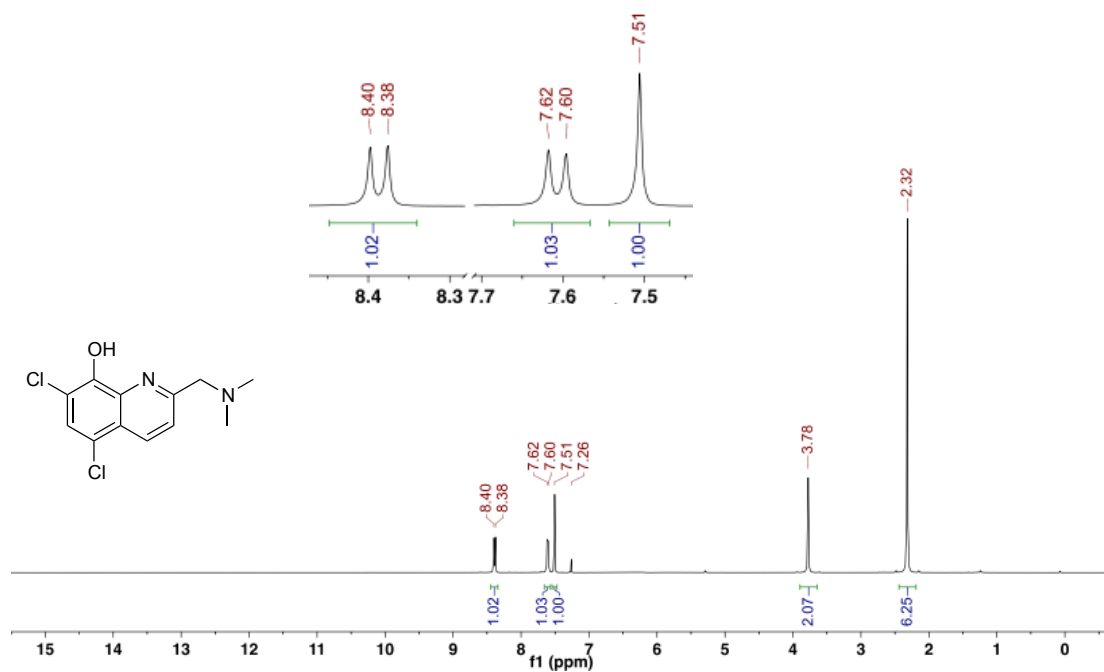

**b**

IE1294.259.fid  
IE1294-100  
CDCI3  
IE1294 #257-60

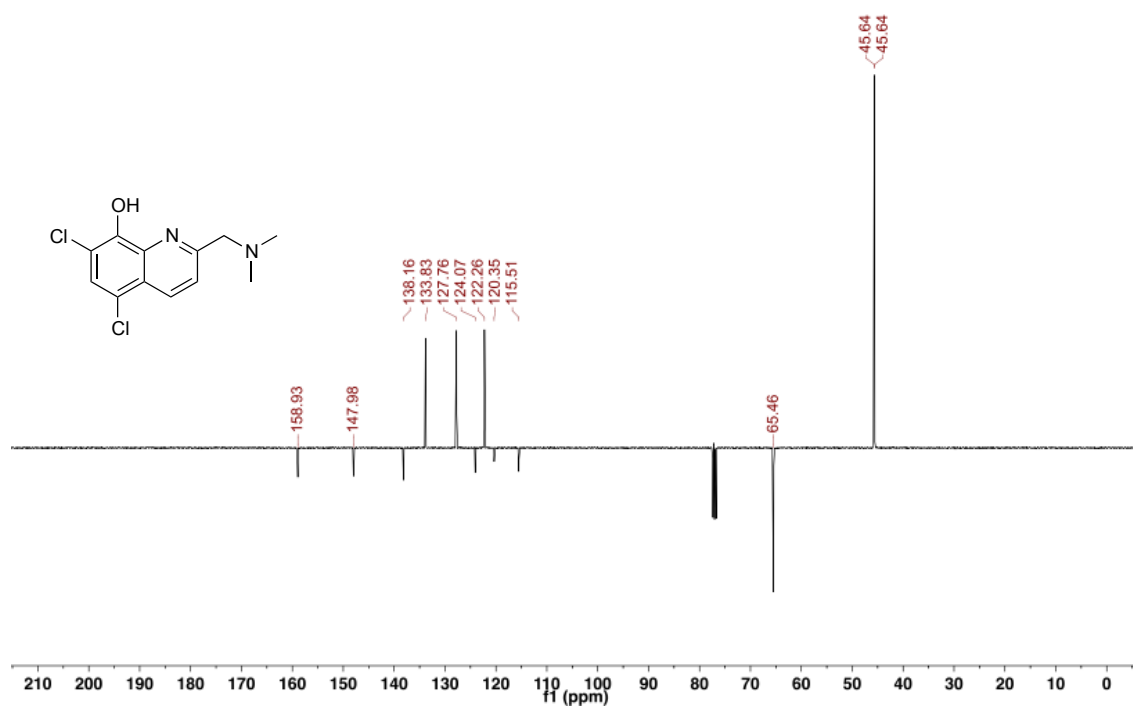

Supplement: mbo006184211sf1.pdf [file mbo006184211sf1.pdf]
