# Supplementary material for: Chemical Synergy between Ionophore PBT2 and Zinc Reverses Antibiotic Resistance
Source: PubMed Central journal article supplement (PMC6299484; doi:10.1128/mbio.02391-18), 2018-12-11

Supplementary Figure 4

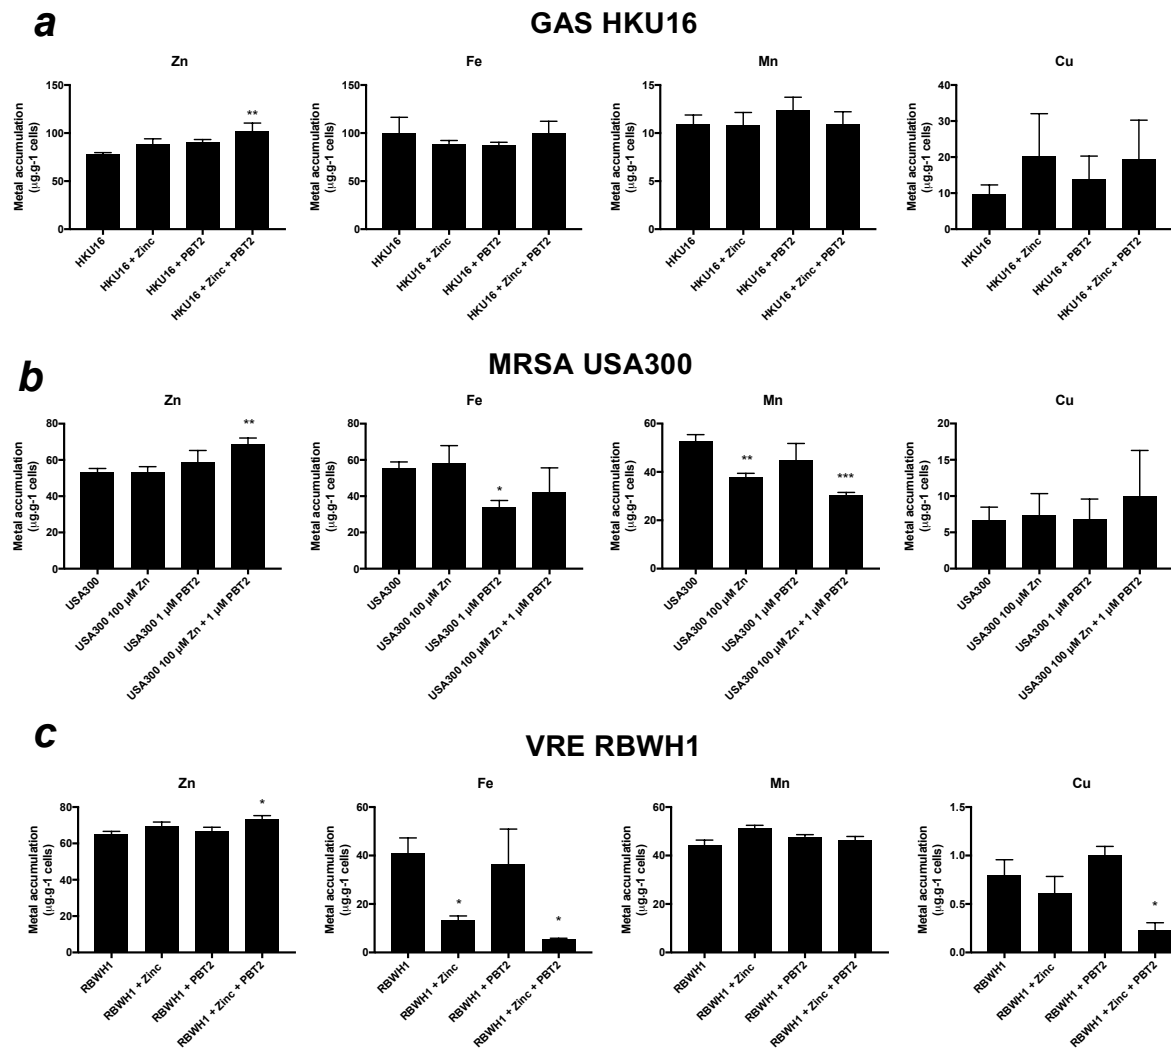

Supplement: mbo006184211sf4.pdf [file mbo006184211sf4.pdf]
