# Supplementary material for: Chemical Synergy between Ionophore PBT2 and Zinc Reverses Antibiotic Resistance
Source: PubMed Central journal article supplement (PMC6299484; doi:10.1128/mbio.02391-18), 2018-12-11

**Supplementary Figure 5**

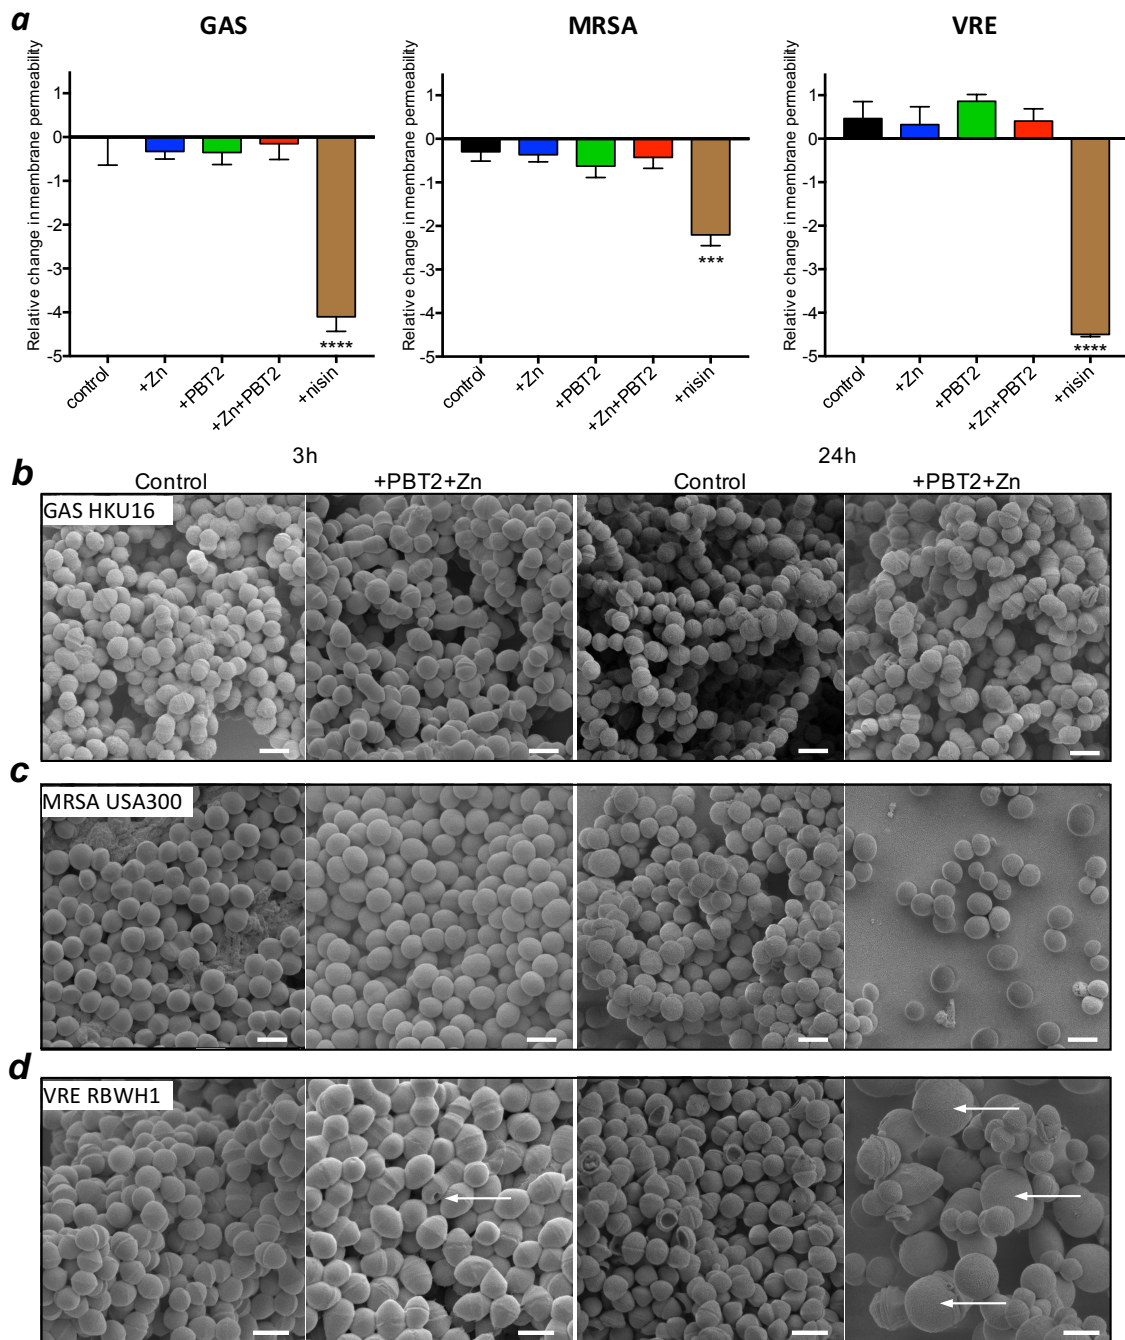

Supplement: mbo006184211sf5.pdf [file mbo006184211sf5.pdf]
