# Supplementary material for: Chemical Synergy between Ionophore PBT2 and Zinc Reverses Antibiotic Resistance
Source: PubMed Central journal article supplement (PMC6299484; doi:10.1128/mbio.02391-18), 2018-12-11
Supplement: mbo006184211st1.pdf [file mbo006184211st1.pdf]

1 *Supplementary Tables*

2

3 *Supplementary Table 1.* PBT2 and zinc are active against Gram-positive bacterial  
4 pathogens.

|                | <b>GAS</b>                                | <b>MRSA</b>                               | <b>VRE</b>                                |
|----------------|-------------------------------------------|-------------------------------------------|-------------------------------------------|
| <b>PBT2</b>    | >30 $\mu\text{M}$                         | 3.75 $\mu\text{M}$                        | 3.75 $\mu\text{M}$                        |
| <b>Zinc</b>    | 2 mM                                      | 3 mM                                      | 3 mM                                      |
| <b>PBT2+Zn</b> | 4 $\mu\text{M}$ PBT2+800 $\mu\text{M}$ Zn | 1 $\mu\text{M}$ PBT2+800 $\mu\text{M}$ Zn | 1 $\mu\text{M}$ PBT2+800 $\mu\text{M}$ Zn |
| <b>PBT2+Zn</b> | 8 $\mu\text{M}$ PBT2+25 $\mu\text{M}$ Zn  | 2 $\mu\text{M}$ PBT2+200 $\mu\text{M}$ Zn | 2 $\mu\text{M}$ PBT2+200 $\mu\text{M}$ Zn |

5 MIC values were determined by broth micro dilution in cation-adjusted Mueller Hinton  
6 broth according to CLSI guidelines, n=3.

7
