# Supplementary material for: Chemical Synergy between Ionophore PBT2 and Zinc Reverses Antibiotic Resistance
Source: PubMed Central journal article supplement (PMC6299484; doi:10.1128/mbio.02391-18), 2018-12-11
Supplement: mbo006184211st2.pdf [file mbo006184211st2.pdf]

7

8 **Supplementary Table 2.** Differentially expressed genes after treatment with PBT2 and  
9 zinc.

10

11 **Supplementary Table 2a.** GAS HKU16 up-regulated genes following 1 h treatment  
12 with 4.75  $\mu$ M PBT2 and 128  $\mu$ M zinc in CAMHB+LHB grown at 37°C.

| Locus_tag* | LogFC** | FDR***   | Gene        | Putative gene product function                           |
|------------|---------|----------|-------------|----------------------------------------------------------|
| 5350       | 3.84    | 1.67E-06 | <i>dacC</i> | Penicillin-binding protein 5, C-terminal domain          |
| 5355       | 3.70    | 1.67E-06 | -           | hypothetical protein                                     |
| 2880       | 3.21    | 3.36E-06 | <i>czcD</i> | zinc exporter                                            |
| 3200       | 2.53    | 1.67E-06 | -           | hypothetical protein                                     |
| 4080       | 2.42    | 4.09E-06 | -           | hypothetical protein                                     |
| 6390       | 2.41    | 4.44E-06 | <i>copY</i> | transcriptional regulator (copper export)                |
| 109275     | 2.40    | 4.82E-05 | <i>YkoI</i> | Uncharacterized membrane protein YkoI                    |
| 8610       | 2.33    | 3.36E-06 | -           | dipicolinate synthase                                    |
| 4750       | 2.19    | 3.36E-06 | <i>glnH</i> | amino acid ABC transporter permease                      |
| 7620       | 2.17    | 1.67E-06 | -           | MerR family transcriptional regulator                    |
| 7615       | 2.17    | 3.36E-06 | <i>glnA</i> | type I glutamate--ammonia ligase                         |
| 8475       | 2.16    | 4.84E-05 | -           | YSIRK-targeted surface antigen transcriptional regulator |
| 6380       | 2.09    | 1.18E-05 | <i>copZ</i> | Copper chaperone CopZ                                    |
| 4755       | 2.06    | 5.46E-06 | -           | amino acid ABC transporter ATP-binding protein           |

|      |      |          |              |                                                        |
|------|------|----------|--------------|--------------------------------------------------------|
| 3080 | 1.98 | 1.22E-05 | <i>rpiA</i>  | ribose-5-phosphate isomerase                           |
| 2055 | 1.97 | 4.09E-06 | -            | hypothetical protein                                   |
| 2155 | 1.97 | 4.09E-06 | -            | hypothetical protein                                   |
| 6385 | 1.97 | 1.69E-05 | <i>copA</i>  | copper-translocating P-type ATPase                     |
| 5640 | 1.94 | 8.75E-05 | <i>dpr</i>   | DNA starvation/stationary phase protection protein     |
| 3085 | 1.84 | 1.43E-05 | <i>deoB</i>  | phosphopentomutase                                     |
| 4010 | 1.82 | 2.53E-05 | -            | lipase/acylhydrolase                                   |
| 6915 | 1.70 | 7.77E-05 | -            | universal stress protein                               |
| 500  | 1.69 | 1.85E-04 | <i>groEL</i> | molecular chaperone GroEL                              |
| 3900 | 1.67 | 3.64E-05 | -            | hypothetical protein                                   |
| 3090 | 1.66 | 1.08E-05 | <i>arsC</i>  | arsenate reductase (glutaredoxin)                      |
| 970  | 1.66 | 1.13E-04 | -            | aldehyde dehydrogenase                                 |
| 7890 | 1.66 | 7.15E-06 | -            | 23S rRNA (guanosine(2251)-2'-O)-methyltransferase RlmB |
| 5550 | 1.64 | 4.09E-06 | <i>mutT</i>  | NUDIX hydrolase                                        |
| 3095 | 1.63 | 1.22E-05 | <i>punA</i>  | purine-nucleoside phosphorylase                        |
| 495  | 1.62 | 9.52E-05 | <i>groES</i> | co-chaperone GroES                                     |
| 2110 | 1.61 | 1.90E-05 | -            | hypothetical protein                                   |
| 6015 | 1.60 | 1.38E-05 | -            | YigZ family protein                                    |
| 1675 | 1.55 | 8.91E-05 | -            | oleate hydratase                                       |
| 5555 | 1.55 | 2.53E-05 | -            | hypothetical protein                                   |
| 1290 | 1.51 | 3.38E-05 | -            | membrane protein                                       |
| 2150 | 1.50 | 2.18E-05 | -            | membrane protein                                       |
| 1155 | 1.50 | 2.56E-04 | -            | O-sialoglycoprotein endopeptidase                      |
| 6065 | 1.49 | 2.18E-05 | <i>fnt</i>   | methionyl-tRNA formyltransferase                       |
| 395  | 1.48 | 1.97E-05 | <i>dexS</i>  | glucohydrolase                                         |
| 3740 | 1.46 | 7.38E-05 | <i>csrA</i>  | peptide-methionine (R)-S-oxide reductase               |
| 1160 | 1.45 | 3.18E-04 | -            | methionine import ATP-binding protein MetN             |
| 1285 | 1.42 | 1.18E-05 | -            | hypothetical protein                                   |
| 7885 | 1.41 | 1.97E-05 | -            | hypothetical protein                                   |
| 2090 | 1.40 | 1.67E-05 | -            | YtxH domain-containing protein                         |
| 465  | 1.38 | 1.90E-03 | <i>noxI</i>  | alkyl hydroperoxide reductase subunit F                |
| 2305 | 1.38 | 4.82E-05 | -            | MBL fold metallo-hydrolase                             |
| 8655 | 1.37 | 7.05E-05 | -            | 4-diphosphocytidyl-2C-methyl-D-erythritol kinase       |
| 470  | 1.35 | 1.43E-03 | <i>ahpC</i>  | peroxiredoxin                                          |
| 7230 | 1.34 | 9.81E-04 | -            | hypothetical protein                                   |
| 8660 | 1.31 | 5.79E-05 | -            | 4-diphosphocytidyl-2C-methyl-D-erythritol kinase       |
| 1165 | 1.31 | 5.53E-04 | -            | methionine ABC transporter permease                    |
| 5245 | 1.29 | 5.36E-04 | -            | phosphocarrier protein HPr                             |
| 1475 | 1.29 | 8.75E-05 | -            | copper homeostasis protein CutC                        |
| 8640 | 1.29 | 3.06E-05 | <i>adcB</i>  | zinc ABC transporter permease                          |
| 745  | 1.25 | 8.91E-05 | <i>speG</i>  | exotoxin                                               |
| 5545 | 1.25 | 1.35E-04 | <i>clpE</i>  | ATP-dependent Clp protease ATP-binding subunit         |
| 2180 | 1.24 | 4.51E-04 | -            | elongation factor Tu                                   |
| 3050 | 1.22 | 1.97E-04 | <i>dys</i>   | dihydrofolate reductase                                |

|      |      |          |             |                                                          |
|------|------|----------|-------------|----------------------------------------------------------|
| 4600 | 1.22 | 5.21E-05 | -           | cation transporter                                       |
| 8645 | 1.20 | 1.97E-05 | <i>adcC</i> | zinc ABC transporter ATP-binding protein                 |
| 1630 | 1.20 | 1.70E-04 | -           | membrane protein                                         |
| 8915 | 1.18 | 4.84E-05 | -           | low molecular weight phosphotyrosine protein phosphatase |
| 7550 | 1.18 | 9.34E-05 | <i>dnaQ</i> | 3'-5' exonuclease                                        |
| 3955 | 1.17 | 1.59E-04 | <i>murB</i> | UDP-N-acetylenolpyruvoylglucosamine reductase            |
| 8230 | 1.16 | 1.57E-04 | -           | integrase                                                |
| 7860 | 1.16 | 4.23E-05 | -           | 30S ribosomal protein S9                                 |
| 9675 | 1.16 | 1.41E-04 | -           | hypothetical protein                                     |
| 4070 | 1.15 | 6.75E-04 | <i>pta</i>  | phosphate acetyltransferase                              |
| 7865 | 1.15 | 2.53E-05 | -           | 50S ribosomal protein L13                                |
| 205  | 1.13 | 2.29E-04 | -           | coenzyme A pyrophosphatase                               |
| 7485 | 1.12 | 6.27E-05 | <i>dinP</i> | DNA polymerase IV                                        |
| 3610 | 1.12 | 8.53E-05 | -           | pyruvate dehydrogenase E1 subunit alpha                  |
| 1005 | 1.12 | 3.64E-05 | -           | ABC transporter ATP-binding protein                      |
| 8010 | 1.11 | 5.79E-05 | -           | thiol reductase thioredoxin                              |
| 4655 | 1.11 | 4.14E-04 | -           | GntR family transcriptional regulator                    |
| 2085 | 1.10 | 2.50E-05 | -           | DUF948 domain containing protein                         |
| 2075 | 1.10 | 4.77E-05 | <i>ptsK</i> | HPr kinase/phosphorylase                                 |
| 1175 | 1.10 | 8.43E-05 | -           | serine/threonine transporter SstT                        |
| 8650 | 1.09 | 5.21E-05 | <i>adcR</i> | transcriptional regulator                                |
| 9375 | 1.09 | 1.19E-04 | -           | hypothetical protein                                     |
| 2070 | 1.09 | 2.55E-05 | -           | membrane protein                                         |
| 5455 | 1.08 | 4.54E-04 | -           | heavy metal translocating P-type ATPase                  |
| 3745 | 1.08 | 5.61E-05 | -           | membrane protein                                         |
| 4660 | 1.07 | 5.71E-04 | -           | ABC transporter ATP-binding protein                      |
| 3250 | 1.07 | 2.57E-05 | <i>apt</i>  | adenine phosphoribosyltransferase                        |
| 3135 | 1.07 | 6.16E-05 | -           | ABC transporter substrate-binding protein                |
| 7545 | 1.06 | 7.38E-05 | -           | MerR family transcriptional regulator                    |
| 2615 | 1.06 | 7.39E-04 | <i>mscL</i> | large-conductance mechanosensitive channel               |
| 5440 | 1.05 | 3.11E-03 | -           | transcriptional regulator                                |
| 5170 | 1.04 | 3.30E-04 | <i>grab</i> | protein G alpha 2M-binding protein                       |
| 8910 | 1.04 | 4.82E-05 | -           | membrane protein                                         |
| 9665 | 1.04 | 1.10E-04 | -           | DUF3042 domain-containing protein                        |
| 2145 | 1.03 | 9.15E-05 | -           | N-acetylmuramoyl-L-alanine amidase                       |
| 5910 | 1.02 | 7.00E-03 | -           | glycosyl hydrolase                                       |
| 1425 | 1.01 | 8.44E-05 | <i>clpP</i> | ATP-dependent Clp protease proteolytic subunit           |
| 5300 | 1.01 | 2.55E-05 | <i>alaS</i> | alanine-tRNA ligase                                      |
| 825  | 1.01 | 1.04E-04 | <i>gltX</i> | glutamate-tRNA ligase                                    |
| 1375 | 1.00 | 8.75E-05 | <i>pflC</i> | pyruvate formate lyase-activating protein                |

13 \*Locus\_tag: identifier corresponding to reference genome sequence, prefix to all  
14 numbers listed is "SPYOHK\_RS", \*\*logFC: log<sub>2</sub> fold change, \*\*\*FDR: false discovery  
15 rate.

- 16 **Supplementary Table 2b.** GAS HKU16 down-regulated genes following 1 h treatment  
 17 with 4.75  $\mu$ M PBT2 and 128  $\mu$ M zinc in CAMHB+LHB grown at 37°C.

| Locus_tag* | LogFC** | FDR***   | Gene          | Putative gene product function                          |
|------------|---------|----------|---------------|---------------------------------------------------------|
| 7930       | -3.77   | 9.05E-05 | -             | transaldolase                                           |
| 3990       | -3.73   | 4.09E-06 | <i>sfcA</i>   | malate dehydrogenase                                    |
| 7935       | -3.69   | 8.15E-05 | <i>ulaA</i>   | PTS ascorbate transporter subunit IIC                   |
| 7940       | -3.54   | 1.07E-04 | -             | PTS maltose transporter subunit IIBC                    |
| 7945       | -3.44   | 8.91E-05 | <i>bglG</i>   | PTS fructose transporter subunit IIA                    |
| 8310       | -2.63   | 1.64E-05 | <i>sgaB</i>   | PTS ascorbate transporter subunit IIB                   |
| 510        | -2.57   | 7.15E-06 | <i>pepD</i>   | dipeptidase                                             |
| 2470       | -2.42   | 4.64E-05 | <i>sagH</i>   | ABC transporter permease                                |
| 8290       | -2.41   | 5.16E-04 | <i>araD</i>   | L-ribulose-5-phosphate 4-epimerase                      |
| 2465       | -2.36   | 8.07E-05 | <i>ccmA</i>   | ABC transporter ATP-binding protein                     |
| 2460       | -2.32   | 6.55E-05 | -             | hypothetical protein                                    |
| 1605       | -2.31   | 3.36E-06 | <i>mtsA</i>   | metal ABC transporter substrate-binding protein         |
| 9380       | -2.29   | 1.18E-05 | -             | hypothetical protein                                    |
| 8630       | -2.21   | 8.91E-05 | -             | tyrosine--tRNA ligase                                   |
| 2475       | -2.19   | 8.18E-05 | -             | ABC transporter permease                                |
| 8295       | -2.16   | 2.14E-04 | -             | L-xylulose 5-phosphate 3-epimerase                      |
| 2680       | -2.12   | 1.14E-04 | -             | membrane protein                                        |
| 8300       | -2.11   | 4.24E-04 | <i>ulaD</i>   | 3-keto-L-gulonate-6-phosphate decarboxylase             |
| 9010       | -2.10   | 1.07E-04 | -             | amidase                                                 |
| 6340       | -2.10   | 1.67E-04 | <i>lacD.1</i> | tagatose-bisphosphate aldolase                          |
| 3865       | -2.08   | 3.63E-05 | -             | serine/threonine dehydratase                            |
| 2675       | -1.99   | 1.08E-05 | -             | glycosyl transferase family 2                           |
| 8025       | -1.98   | 1.79E-04 | -             | ABC transporter ATP-binding protein                     |
| 2450       | -1.98   | 7.32E-05 | -             | streptolysin associated protein SagD                    |
| 2455       | -1.97   | 5.79E-05 | -             | CPBP family intramembrane metalloprotease               |
| 3860       | -1.96   | 9.33E-06 | -             | lanthionine synthetase                                  |
| 8895       | -1.96   | 4.84E-05 | <i>adhA</i>   | zinc-dependent alcohol dehydrogenase                    |
| 2670       | -1.95   | 1.64E-05 | -             | phosphoglycerol transferase                             |
| 695        | -1.90   | 4.12E-05 | <i>emm12</i>  | YSIRK signal domain/LPXTG anchor domain surface protein |
| 6350       | -1.90   | 1.80E-04 | -             | galactose-6-phosphate isomerase                         |
| 8315       | -1.88   | 2.44E-04 | -             | PTS ascorbate transporter subunit IIC                   |
| 460        | -1.87   | 5.62E-04 | <i>hutI</i>   | imidazolonepropionase                                   |
| 8280       | -1.87   | 3.73E-04 | -             | L-ascorbate-6-phosphate lactonase                       |
| 2445       | -1.83   | 9.42E-05 | <i>sagC</i>   | streptolysin associated protein SagC                    |
| 3855       | -1.81   | 4.06E-05 | -             | ABC transporter ATP-binding protein                     |
| 5520       | -1.79   | 9.33E-06 | -             | phosphomannomutase                                      |
| 2440       | -1.72   | 1.10E-04 | <i>sagB</i>   | streptolysin associated protein SagB                    |
| 5680       | -1.72   | 1.05E-03 | <i>asnA</i>   | asparagine synthetase A                                 |
| 8305       | -1.70   | 2.47E-04 | -             | PTS ascorbate transporter subunit IIA                   |

|      |       |          |               |                                                                  |
|------|-------|----------|---------------|------------------------------------------------------------------|
| 6355 | -1.70 | 4.96E-04 | <i>lacA.1</i> | galactose-6-phosphate isomerase subunit LacA                     |
| 2685 | -1.69 | 1.08E-05 | -             | transcriptional activator amrA                                   |
| 6150 | -1.68 | 1.61E-05 | -             | aminopeptidase C                                                 |
| 8480 | -1.67 | 4.24E-06 | -             | hypothetical protein                                             |
| 8485 | -1.64 | 3.84E-06 | -             | SrtB family sortase                                              |
| 2665 | -1.60 | 4.37E-05 | <i>rgpFc</i>  | alpha-L-Rha alpha-1,3-L-rhamnosyltransferase                     |
| 4355 | -1.53 | 4.82E-05 | <i>lpIA</i>   | lipoate--protein ligase A                                        |
| 6250 | -1.53 | 5.36E-04 | -             | transaldolase                                                    |
| 2690 | -1.52 | 4.12E-05 | -             | hypothetical protein                                             |
| 4865 | -1.48 | 2.31E-04 | -             | multidrug transporter MatE                                       |
| 45   | -1.47 | 2.02E-03 | -             | YitT family protein                                              |
| 3885 | -1.47 | 1.84E-04 | <i>srtE</i>   | lantibiotic ABC transporter permease                             |
| 5450 | -1.46 | 2.82E-03 | <i>pyrD</i>   | dihydroorotate oxidase                                           |
| 6255 | -1.45 | 7.08E-04 | -             | DNA-binding protein                                              |
| 2415 | -1.45 | 1.61E-03 | -             | hypothetical protein                                             |
| 35   | -1.42 | 4.84E-04 | -             | copper ABC transporter permease                                  |
| 5875 | -1.40 | 3.74E-03 | -             | ABC transporter substrate-binding protein                        |
| 3850 | -1.39 | 3.18E-04 | <i>srtA</i>   | lantibiotic streptin                                             |
| 4700 | -1.39 | 3.93E-03 | <i>malF</i>   | sugar ABC transporter permease                                   |
| 5220 | -1.38 | 6.65E-04 | <i>udk</i>    | uridine kinase                                                   |
| 4360 | -1.38 | 5.21E-05 | -             | deacetylase SIR2                                                 |
| 2515 | -1.38 | 3.92E-03 | <i>atpH</i>   | ATP synthase subunit delta                                       |
| 3880 | -1.37 | 2.27E-04 | <i>srtF</i>   | lantibiotic transport ATP-binding protein SrtF                   |
| 4350 | -1.36 | 1.54E-05 | <i>fhs.1</i>  | formate-tetrahydrofolate ligase                                  |
| 3890 | -1.35 | 8.53E-05 | <i>srtG</i>   | lantibiotic ABC transporter permease                             |
| 4705 | -1.35 | 2.59E-03 | -             | maltose ABC transporter permease                                 |
| 4870 | -1.35 | 1.40E-04 | -             | ABC transporter ATP-binding protein                              |
| 8490 | -1.34 | 2.37E-05 | -             | QVPTGV class sortase B protein-sorting domain-containing protein |
| 2535 | -1.33 | 1.17E-03 | <i>atpC</i>   | ATP synthase epsilon chain                                       |
| 4695 | -1.32 | 5.63E-03 | -             | maltose/maltodextrin-binding protein                             |
| 2660 | -1.32 | 5.36E-05 | <i>rgpEc</i>  | glycosyl transferase                                             |
| 6260 | -1.30 | 1.69E-03 | -             | NAD(P)/FAD-dependent oxidoreductase                              |
| 2345 | -1.29 | 1.10E-04 | -             | dipeptidase                                                      |
| 40   | -1.28 | 1.81E-04 | -             | ABC-F family ATPase                                              |
| 2655 | -1.27 | 5.21E-05 | <i>rgpDc</i>  | ABC transporter ATP-binding protein                              |
| 5210 | -1.27 | 4.56E-04 | -             | PrsW family intramembrane metalloprotease                        |
| 8495 | -1.27 | 1.11E-04 | -             | signal peptidase I                                               |
| 3650 | -1.26 | 7.52E-05 | -             | membrane protein                                                 |
| 2530 | -1.26 | 1.24E-03 | <i>atpD</i>   | ATP synthase subunit beta                                        |
| 2510 | -1.26 | 3.63E-03 | <i>atpF</i>   | ATP synthase subunit B                                           |
| 6820 | -1.25 | 2.00E-02 | -             | acyl carrier protein                                             |
| 5500 | -1.25 | 5.79E-05 | <i>fps</i>    | geranyltranstransferase                                          |
| 4365 | -1.25 | 8.91E-05 | -             | hypothetical protein                                             |
| 3655 | -1.23 | 6.55E-05 | -             | hypothetical protein                                             |

|      |       |          |               |                                                                   |
|------|-------|----------|---------------|-------------------------------------------------------------------|
| 2500 | -1.21 | 6.40E-03 | <i>atpE</i>   | F0F1 ATP synthase subunit C                                       |
| 2505 | -1.20 | 5.78E-03 | <i>atpB</i>   | ATP synthase subunit A                                            |
| 6920 | -1.19 | 4.88E-04 | -             | haloacid dehalogenase                                             |
| 2650 | -1.19 | 1.42E-04 | <i>rgpCc</i>  | LPS ABC transporter                                               |
| 3895 | -1.18 | 7.99E-04 | -             | transcriptional regulator                                         |
| 2525 | -1.17 | 4.36E-03 | <i>atpG</i>   | ATP synthase subunit gamma                                        |
| 3285 | -1.16 | 8.47E-05 | <i>cpsFP</i>  | dTDP-4-dehydrorhamnose 3,5-epimerase                              |
| 9795 | -1.15 | 5.45E-04 | -             | hypothetical protein                                              |
| 2520 | -1.15 | 4.15E-03 | <i>atpA</i>   | ATP synthase subunit alpha                                        |
| 1040 | -1.14 | 4.65E-05 | -             | peptide ABC transporter substrate-binding protein                 |
| 4000 | -1.14 | 1.42E-03 | -             | acid phosphatase/phosphotransferase                               |
| 6695 | -1.14 | 5.79E-05 | -             | tRNA (guanosine(46)-N7)-methyltransferase TrmB                    |
| 1610 | -1.14 | 1.24E-04 | <i>mtsB</i>   | ABC transporter ATP-binding protein                               |
| 210  | -1.13 | 8.15E-04 | -             | DUF368 domain-containing protein                                  |
| 4405 | -1.13 | 4.74E-05 | <i>pgmA</i>   | phosphoglucomutase                                                |
| 5485 | -1.12 | 5.59E-05 | <i>recN</i>   | DNA repair protein RecN                                           |
| 7510 | -1.10 | 1.40E-02 | <i>glpF.2</i> | aquaporin                                                         |
| 3280 | -1.10 | 8.18E-05 | <i>cpsFO</i>  | glucose-1-phosphate thymidyltransferase                           |
| 690  | -1.09 | 1.89E-04 | <i>mga</i>    | transcriptional regulator                                         |
| 4325 | -1.08 | 1.90E-03 | -             | membrane protein                                                  |
| 2160 | -1.08 | 4.82E-05 | <i>bsaA</i>   | glutathione peroxidase                                            |
| 105  | -1.08 | 6.26E-04 | <i>pgsA</i>   | CDP-diacylglycerol-glycerol-3-phosphate 3-phosphatidyltransferase |
| 2850 | -1.07 | 1.14E-04 | -             | ABC transporter permease                                          |
| 3290 | -1.07 | 8.44E-05 | <i>cpsFQ</i>  | dTDP-glucose 4,6-dehydratase                                      |
| 5880 | -1.07 | 4.97E-03 | -             | carbohydrate ABC transporter permease                             |
| 1910 | -1.06 | 2.84E-03 | <i>acpA</i>   | ribonuclease 3                                                    |
| 2645 | -1.05 | 5.79E-05 | <i>rgpBc</i>  | alpha-L-Rha alpha-1,3-L-rhamnosyltransferase                      |
| 5720 | -1.05 | 5.05E-04 | -             | arginine regulator                                                |
| 4250 | -1.05 | 1.10E-04 | <i>satD</i>   | DNA-binding protein                                               |
| 2480 | -1.04 | 4.84E-05 | -             | nuclease                                                          |
| 2855 | -1.04 | 3.74E-05 | -             | glycerophosphodiester phosphodiesterase                           |
| 2125 | -1.03 | 6.60E-04 | -             | HAD family hydrolase                                              |
| 3780 | -1.02 | 9.11E-05 | -             | iron ABC transporter substrate-binding protein                    |
| 1340 | -1.02 | 2.89E-04 | -             | membrane protein insertion efficiency factor YidD                 |
| 4830 | -1.01 | 2.42E-02 | -             | diaminopimelate epimerase                                         |
| 875  | -1.01 | 2.90E-02 | -             | sugar ABC transporter permease                                    |
| 5495 | -1.01 | 8.28E-05 | <i>hlyA1</i>  | TlyA family rRNA (cytidine-2'-O)-methyltransferase                |
| 4670 | -1.00 | 4.82E-05 | -             | TVP38/TMEM64 family protein                                       |
| 4875 | -1.00 | 4.77E-04 | -             | ABC transporter ATP-binding protein                               |

18 \*Locus\_tag: identifier corresponding to reference genome sequence, prefix to all  
19 numbers listed is “SPYOHK\_RS”, \*\*logFC: log<sub>2</sub> fold change, \*\*\*FDR: false discovery  
20 rate.

- 21 **Supplementary Table 2c.** MRSA USA300 up-regulated genes following 1 h treatment  
 22 with 2  $\mu$ M PBT2 and 50  $\mu$ M zinc in CAMHB grown at 37°C.

| Locus_tag* | LogFC** | FDR***   | Gene        | Putative gene product function                              |
|------------|---------|----------|-------------|-------------------------------------------------------------|
| 280        | 8.27    | 2.18E-10 | <i>frmA</i> | alcohol dehydrogenase                                       |
| 3005       | 6.61    | 3.85E-11 | <i>vraX</i> | protein VraX                                                |
| 670        | 6.38    | 1.21E-10 | <i>butA</i> | diacetyl reductase ((S)-acetoin forming)                    |
| 13850      | 6.22    | 7.50E-10 | -           | hypothetical protein                                        |
| 10975      | 6.10    | 3.21E-10 | <i>amt</i>  | ammonia permease                                            |
| 11055      | 6.04    | 3.85E-11 | <i>leuA</i> | 2-isopropylmalate synthase                                  |
| 13940      | 6.04    | 7.52E-10 | <i>ynzC</i> | hypothetical protein                                        |
| 11050      | 6.00    | 9.11E-11 | <i>ilvC</i> | ketol-acid reductoisomerase                                 |
| 11060      | 5.80    | 1.18E-10 | <i>leuB</i> | 3-isopropylmalate dehydrogenase                             |
| 11065      | 5.75    | 6.55E-11 | <i>leuC</i> | 3-isopropylmalate dehydratase large subunit                 |
| 11070      | 5.67    | 4.15E-10 | <i>leuD</i> | 3-isopropylmalate dehydratase small subunit                 |
| 13935      | 5.67    | 1.01E-09 | -           | unknown                                                     |
| 11075      | 5.63    | 8.76E-11 | <i>ilvA</i> | L-threonine dehydratase biosynthetic IlvA                   |
| 13860      | 5.57    | 5.46E-12 | <i>copZ</i> | copper chaperone CopZ                                       |
| 13855      | 5.56    | 1.08E-11 | <i>zntA</i> | copper-exporting P-type ATPase A                            |
| 11045      | 5.54    | 3.47E-09 | <i>ilvN</i> | acetolactate synthase                                       |
| 3085       | 5.52    | 2.18E-10 | -           | transcriptional regulator                                   |
| 11040      | 5.32    | 2.91E-10 | <i>ilvB</i> | acetolactate synthase, large subunit, biosynthetic type     |
| 11035      | 5.26    | 4.18E-10 | <i>ilvD</i> | dihydroxy-acid dehydratase                                  |
| 3080       | 5.25    | 8.96E-11 | -           | dihydrolipoamide dehydrogenase                              |
| 13600      | 5.23    | 5.87E-10 | -           | MarR family transcriptional regulator                       |
| 4080       | 5.15    | 6.05E-10 | <i>gap</i>  | aldehyde dehydrogenase                                      |
| 13080      | 5.15    | 6.55E-11 | <i>hlgB</i> | gamma-hemolysin component B                                 |
| 4090       | 5.10    | 3.77E-10 | <i>tpiA</i> | triose-phosphate isomerase                                  |
| 4095       | 5.08    | 4.27E-10 | <i>gpmI</i> | 2,3-bisphosphoglycerate-independent phosphoglycerate mutase |
| 4085       | 5.06    | 5.31E-10 | <i>pgk</i>  | phosphoglycerate kinase                                     |
| 13385      | 4.98    | 8.27E-10 | -           | carboxymuconolactone decarboxylase family protein           |
| 13075      | 4.89    | 8.96E-11 | <i>hlgC</i> | gamma-hemolysin component C                                 |
| 13595      | 4.76    | 6.05E-10 | -           | MFS transporter                                             |
| 13730      | 4.73    | 1.72E-10 | -           | thiol reductase thioredoxin                                 |
| 4075       | 4.71    | 1.28E-09 | -           | transcriptional regulator                                   |
| 395        | 4.66    | 3.56E-11 | -           | copper-translocating P-type ATPase                          |
| 400        | 4.64    | 1.69E-11 | -           | hypothetical protein                                        |
| 13070      | 4.64    | 1.03E-10 | <i>hlgA</i> | gamma-hemolysin component A                                 |
| 10265      | 4.58    | 2.61E-10 | -           | DNA polymerase IV                                           |
| 4730       | 4.54    | 3.02E-09 | <i>clpB</i> | chaperone protein ClpB                                      |
| 2725       | 4.50    | 1.98E-09 | -           | protein arginine kinase                                     |
| 4990       | 4.44    | 2.48E-09 | -           | hypothetical protein                                        |
| 11830      | 4.44    | 3.65E-10 | -           | NADP-dependent oxidoreductase                               |

|       |      |          |              |                                                     |
|-------|------|----------|--------------|-----------------------------------------------------|
| 2715  | 4.40 | 1.69E-09 | <i>ctsR</i>  | transcriptional regulator CtsR                      |
| 3960  | 4.37 | 1.52E-09 | <i>yfiA</i>  | ribosomal subunit interface protein                 |
| 13170 | 4.34 | 1.03E-10 | -            | hypothetical protein                                |
| 6480  | 4.33 | 8.54E-11 | -            | MerR family transcriptional regulator               |
| 6485  | 4.31 | 3.85E-11 | <i>glnA</i>  | glutamine synthetase                                |
| 13635 | 4.28 | 8.40E-09 | -            | ring-cleaving dioxygenase                           |
| 2730  | 4.27 | 1.37E-09 | <i>clpC</i>  | ATP-dependent Clp protease ATP-binding subunit ClpC |
| 13630 | 4.27 | 1.39E-09 | -            | carboxylesterase                                    |
| 3245  | 4.20 | 2.61E-10 | -            | alpha/beta hydrolase                                |
| 6490  | 4.19 | 1.94E-08 | -            | hypothetical protein                                |
| 2110  | 4.18 | 6.05E-10 | -            | hypothetical protein                                |
| 13735 | 4.17 | 1.48E-10 | -            | acyl-CoA thioester hydrolase                        |
| 13780 | 4.16 | 4.00E-08 | -            | hypothetical protein                                |
| 1980  | 4.07 | 5.87E-10 | -            | peptidase                                           |
| 14120 | 4.06 | 3.58E-10 | -            | antibiotic biosynthesis monooxygenase               |
| 11870 | 4.03 | 1.03E-10 | <i>lacA</i>  | unknown                                             |
| 340   | 4.00 | 3.83E-09 | -            | universal stress protein                            |
| 11805 | 4.00 | 2.18E-10 | <i>asp23</i> | Asp23/Gls24 family envelope stress response protein |
| 3310  | 4.00 | 6.55E-11 | -            | sodium:proton antiporter                            |
| 3270  | 3.98 | 4.96E-10 | -            | recombinase                                         |
| 13785 | 3.97 | 1.49E-09 | -            | hypothetical protein                                |
| 11810 | 3.97 | 2.61E-10 | -            | hypothetical protein                                |
| 13725 | 3.96 | 8.96E-11 | -            | alpha/beta hydrolase                                |
| 12160 | 3.92 | 2.35E-10 | -            | hypothetical protein                                |
| 11815 | 3.92 | 2.99E-10 | -            | hypothetical protein                                |
| 11860 | 3.89 | 2.18E-10 | <i>lacC</i>  | tagatose-6-phosphate kinase                         |
| 14620 | 3.89 | 3.28E-09 | -            | membrane protein                                    |
| 9425  | 3.89 | 3.67E-11 | -            | transaldolase                                       |
| 11430 | 3.84 | 2.18E-10 | -            | aldehyde dehydrogenase family protein               |
| 2105  | 3.82 | 2.74E-10 | -            | NAD(P)-dependent oxidoreductase                     |
| 14615 | 3.82 | 6.44E-09 | -            | arylamine N-acetyltransferase                       |
| 9640  | 3.82 | 5.77E-09 | <i>epiE</i>  | hypothetical protein                                |
| 2025  | 3.81 | 1.89E-10 | <i>ahpC</i>  | alkyl hydroperoxide reductase subunit C             |
| 14095 | 3.80 | 2.87E-09 | -            | hypothetical protein                                |
| 13775 | 3.78 | 1.02E-08 | -            | hypothetical protein                                |
| 10855 | 3.77 | 9.68E-11 | -            | succinyl-diaminopimelate desuccinylase              |
| 11855 | 3.77 | 3.41E-10 | <i>lacD</i>  | tagatose 1,6-diphosphate aldolase                   |
| 9645  | 3.72 | 1.66E-09 | <i>epiF</i>  | bacitracin ABC transporter ATP-binding protein      |
| 13750 | 3.71 | 2.38E-10 | <i>cidB</i>  | holin-like protein CidB                             |
| 8075  | 3.70 | 1.97E-08 | -            | hypothetical protein                                |
| 11840 | 3.67 | 2.45E-10 | <i>lacG</i>  | 6-phospho-beta-galactosidase                        |
| 13745 | 3.66 | 1.10E-10 | <i>cidC</i>  | pyruvate oxidase                                    |
| 12860 | 3.66 | 7.52E-10 | -            | general stress protein                              |
| 4225  | 3.66 | 2.18E-10 | -            | hypothetical protein                                |



|       |      |          |             |                                                          |
|-------|------|----------|-------------|----------------------------------------------------------|
| 7505  | 3.62 | 8.76E-11 | -           | hypothetical protein                                     |
| 5270  | 3.62 | 1.62E-09 | -           | hypothetical protein                                     |
| 2030  | 3.61 | 6.65E-11 | -           | NADPH-dependent oxidoreductase                           |
| 3815  | 3.61 | 2.09E-10 | -           | lipid kinase                                             |
| 545   | 3.61 | 2.91E-09 | -           | amidohydrolase                                           |
| 13290 | 3.61 | 2.18E-10 | -           | peptidase M28                                            |
| 12605 | 3.60 | 2.45E-10 | <i>hutG</i> | formimidoylglutamase                                     |
| 11930 | 3.60 | 1.34E-09 | -           | toxin                                                    |
| 550   | 3.60 | 1.34E-09 | -           | MFS transporter                                          |
| 11550 | 3.58 | 1.21E-10 | -           | NAD(P)-dependent oxidoreductase                          |
| 4400  | 3.55 | 2.09E-10 | -           | CsbD family protein                                      |
| 11850 | 3.54 | 4.97E-10 | <i>lacF</i> | lactose-specific phosphotransferase enzyme IIA component |
| 8750  | 3.54 | 7.52E-10 | -           | DUF4930 domain-containing protein                        |
| 13145 | 3.48 | 4.96E-10 | -           | GtrA family protein                                      |
| 355   | 3.47 | 1.38E-09 | -           | lysophospholipase                                        |
| 2100  | 3.44 | 4.00E-08 | -           | membrane protein                                         |
| 10140 | 3.44 | 8.96E-10 | -           | glutamine amidotransferase                               |
| 4065  | 3.42 | 2.84E-10 | -           | epimerase                                                |
| 1805  | 3.41 | 2.72E-10 | -           | NAD(P)H-dependent oxidoreductase                         |
| 1795  | 3.39 | 3.03E-10 | -           | glyoxalase                                               |
| 12575 | 3.38 | 8.96E-11 | -           | oxidoreductase                                           |
| 13805 | 3.38 | 1.13E-09 | -           | ATP-dependent Clp protease ATP-binding subunit           |
| 12320 | 3.38 | 1.35E-10 | <i>fdhD</i> | sulfurtransferase FdhD                                   |
| 9040  | 3.38 | 9.44E-09 | -           | universal stress protein UspA                            |
| 4100  | 3.37 | 2.63E-09 | <i>eno</i>  | enolase                                                  |
| 3305  | 3.34 | 1.54E-10 | -           | cation:proton antiporter                                 |
| 3275  | 3.34 | 1.10E-10 | -           | cation:proton antiporter                                 |
| 2020  | 3.34 | 3.01E-10 | <i>ahpF</i> | alkyl hydroperoxide reductase subunit F                  |
| 1800  | 3.34 | 2.35E-10 | -           | LLM class flavin-dependent oxidoreductase                |
| 13655 | 3.34 | 8.62E-10 | <i>frp</i>  | NAD(P)H-dependent oxidoreductase                         |
| 2055  | 3.33 | 1.86E-10 | -           | hypothetical protein                                     |
| 8395  | 3.32 | 1.88E-08 | <i>dnaK</i> | molecular chaperone DnaK                                 |
| 10425 | 3.31 | 2.20E-08 | -           | hypothetical protein                                     |
| 3280  | 3.31 | 1.01E-09 | -           | Na(+)/H(+) antiporter subunit B                          |
| 10105 | 3.29 | 9.16E-10 | -           | metal-dependent hydrolase                                |
| 14010 | 3.27 | 8.96E-10 | -           | fructosamine kinase family protein                       |
| 13800 | 3.27 | 7.82E-08 | -           | methylated-DNA--[protein]-cysteine S-methyltransferase   |
| 1090  | 3.27 | 4.76E-10 | -           | peptidase M23                                            |
| 1240  | 3.25 | 7.57E-10 | -           | nitric oxide dioxygenase                                 |
| 9020  | 3.25 | 2.50E-09 | -           | metal-dependent hydrolase                                |
| 3285  | 3.24 | 2.63E-09 | -           | cation:proton antiporter                                 |
| 8080  | 3.19 | 3.87E-09 | -           | mannosyl-glycoprotein endo-beta-N-acetylglucosamidase    |
| 14090 | 3.18 | 4.48E-08 | -           | aspartate aminotransferase family protein                |
| 1750  | 3.17 | 7.03E-10 | -           | aldehyde reductase                                       |

|       |      |          |             |                                                          |
|-------|------|----------|-------------|----------------------------------------------------------|
| 7325  | 3.17 | 2.18E-10 | <i>nth</i>  | endonuclease III                                         |
| 4060  | 3.16 | 4.18E-10 | <i>clpP</i> | ATP-dependent Clp protease proteolytic subunit           |
| 1235  | 3.14 | 1.15E-07 | -           | hypothetical protein                                     |
| 3585  | 3.14 | 4.95E-10 | -           | hypothetical protein                                     |
| 4030  | 3.14 | 2.18E-10 | <i>trxB</i> | thioredoxin reductase                                    |
| 3290  | 3.13 | 2.18E-10 | -           | cation:proton antiporter                                 |
| 7330  | 3.13 | 1.65E-10 | -           | chromosome replication protein DnaD                      |
| 2550  | 3.13 | 4.54E-10 | -           | stage V sporulation protein G                            |
| 14560 | 3.11 | 4.43E-09 | -           | polyisoprenoid-binding protein                           |
| 3575  | 3.10 | 2.18E-10 | -           | Rossmann fold protein, TIGR00730 family                  |
| 3300  | 3.10 | 3.63E-10 | -           | cation:proton antiporter                                 |
| 9790  | 3.10 | 7.48E-10 | -           | hypothetical protein                                     |
| 8405  | 3.10 | 5.26E-08 | <i>hrcA</i> | HrcA family transcriptional regulator                    |
| 11835 | 3.09 | 2.18E-10 | -           | alpha/beta hydrolase                                     |
| 13140 | 3.07 | 8.68E-09 | -           | hypothetical protein                                     |
| 14370 | 3.07 | 1.03E-09 | -           | accessory Sec system translocase SecA2                   |
| 3295  | 3.06 | 2.72E-08 | -           | Na <sup>+</sup> /H <sup>+</sup> antiporter subunit E     |
| 1645  | 3.06 | 4.56E-10 | -           | peptide ABC transporter permease                         |
| 9210  | 3.05 | 9.94E-10 | -           | DUF948 domain containing protein                         |
| 7365  | 3.04 | 6.76E-10 | -           | zinc metallopeptidase                                    |
| 3730  | 3.04 | 1.72E-09 | -           | 7-carboxy-7-deazaguanine synthase QueE                   |
| 4045  | 3.03 | 2.74E-10 | -           | YvcK family protein                                      |
| 7320  | 3.03 | 1.54E-10 | -           | hypothetical protein                                     |
| 12790 | 3.03 | 5.36E-09 | -           | hypothetical protein                                     |
| 7975  | 3.02 | 1.38E-09 | -           | hypothetical protein                                     |
| 3725  | 3.02 | 3.84E-10 | -           | hypothetical protein                                     |
| 5805  | 3.01 | 1.18E-08 | -           | hypothetical protein                                     |
| 8400  | 2.99 | 2.39E-08 | <i>grpE</i> | nucleotide exchange factor GrpE                          |
| 1650  | 2.97 | 4.96E-10 | -           | ABC transporter ATP-binding protein                      |
| 7045  | 2.95 | 2.72E-10 | -           | hypothetical protein                                     |
| 2545  | 2.94 | 4.75E-10 | -           | RidA family protein                                      |
| 3910  | 2.94 | 2.61E-10 | -           | glycerate kinase                                         |
| 4050  | 2.93 | 1.79E-10 | -           | sporulation regulator WhiA                               |
| 7160  | 2.93 | 2.10E-09 | -           | hypothetical protein                                     |
| 9055  | 2.92 | 1.43E-10 | <i>tpx</i>  | 2-Cys peroxiredoxin                                      |
| 7485  | 2.91 | 4.26E-10 | <i>ebpS</i> | elastin-binding protein EbpS                             |
| 10450 | 2.91 | 2.38E-09 | -           | thioredoxin family protein                               |
| 7165  | 2.90 | 1.38E-09 | <i>crr</i>  | glucose-specific phosphotransferase enzyme IIA component |
| 13640 | 2.89 | 1.78E-09 | -           | MarR family transcriptional regulator                    |
| 10475 | 2.88 | 4.25E-10 | -           | GntR family transcriptional regulator                    |
| 4635  | 2.88 | 2.45E-10 | -           | NADH-dependent flavin oxidoreductase                     |
| 12400 | 2.88 | 9.63E-09 | -           | hypothetical protein                                     |
| 5895  | 2.87 | 2.83E-10 | -           | glyoxalase                                               |
| 4260  | 2.87 | 8.62E-10 | -           | thiol reductase thioredoxin                              |

|       |      |          |              |                                                                     |
|-------|------|----------|--------------|---------------------------------------------------------------------|
| 4245  | 2.87 | 4.38E-09 | -            | organic hydroperoxide reductase OsmC/OhrA                           |
| 7615  | 2.87 | 5.40E-09 | -            | tail protein                                                        |
| 3580  | 2.86 | 7.50E-10 | -            | DUF188 domain-containing protein                                    |
| 5605  | 2.85 | 2.18E-10 | -            | colicin V production protein CvpA                                   |
| 11825 | 2.85 | 6.51E-10 | -            | zinc-binding alcohol dehydrogenase                                  |
| 13370 | 2.84 | 7.28E-10 | -            | hypothetical protein                                                |
| 740   | 2.83 | 8.24E-09 | <i>deoB</i>  | phosphopentomutase                                                  |
| 3735  | 2.82 | 1.43E-08 | -            | 6-carboxytetrahydropterin synthase QueD                             |
| 5735  | 2.82 | 6.71E-09 | -            | hypothetical protein                                                |
| 11615 | 2.80 | 9.42E-10 | <i>mtlA</i>  | PTS mannitol transporter subunit IIA                                |
| 13975 | 2.80 | 5.75E-10 | -            | alpha/beta hydrolase                                                |
| 8610  | 2.80 | 2.32E-10 | -            | LLM class flavin-dependent oxidoreductase                           |
| 9650  | 2.79 | 3.11E-09 | <i>epiP</i>  | peptidase S8                                                        |
| 10900 | 2.78 | 3.07E-08 | <i>groL</i>  | molecular chaperone GroEL                                           |
| 7970  | 2.77 | 1.43E-09 | <i>gnd</i>   | phosphogluconate dehydrogenase (NADP(+)-dependent, decarboxylating) |
| 5630  | 2.77 | 1.48E-10 | -            | excinuclease ABC subunit C                                          |
| 3940  | 2.77 | 7.62E-10 | -            | YigZ family protein                                                 |
| 1990  | 2.77 | 2.20E-10 | -            | GlsB/YeaQ/YmgE family stress response membrane protein              |
| 4550  | 2.77 | 2.53E-10 | -            | hypothetical protein                                                |
| 5285  | 2.75 | 2.61E-10 | -            | hypothetical protein                                                |
| 9240  | 2.75 | 3.42E-09 | -            | glutamyl aminopeptidase                                             |
| 11530 | 2.74 | 5.17E-10 | -            | hypothetical protein                                                |
| 11620 | 2.74 | 3.16E-10 | <i>mtlD</i>  | mannitol-1-phosphate 5-dehydrogenase                                |
| 3235  | 2.74 | 3.73E-09 | -            | hypothetical protein                                                |
| 12470 | 2.73 | 7.52E-10 | -            | hypothetical protein                                                |
| 7620  | 2.72 | 5.13E-08 | -            | tail protein                                                        |
| 14355 | 2.71 | 1.44E-08 | -            | hypothetical protein                                                |
| 4295  | 2.67 | 4.86E-09 | -            | thiol reductase thioredoxin                                         |
| 12510 | 2.67 | 1.28E-09 | -            | MurR/RpiR family transcriptional regulator                          |
| 12475 | 2.67 | 8.74E-10 | -            | formate dehydrogenase subunit alpha                                 |
| 7170  | 2.67 | 4.86E-09 | <i>msrB</i>  | peptide-methionine (R)-S-oxide reductase                            |
| 6725  | 2.67 | 2.45E-09 | -            | transketolase                                                       |
| 10470 | 2.64 | 1.04E-09 | -            | ABC transporter ATP-binding protein                                 |
| 4845  | 2.63 | 1.24E-09 | -            | adaptor protein MecA                                                |
| 10905 | 2.62 | 3.30E-08 | <i>groES</i> | co-chaperone GroES                                                  |
| 5405  | 2.62 | 2.83E-10 | -            | membrane protein                                                    |
| 8795  | 2.61 | 5.56E-08 | -            | hypothetical protein                                                |
| 8745  | 2.61 | 5.14E-09 | -            | hypothetical protein                                                |
| 11775 | 2.58 | 3.83E-09 | -            | IucA/IucC family siderophore biosynthesis protein                   |
| 14675 | 2.58 | 8.10E-10 | -            | nucleoid occlusion protein                                          |
| 13415 | 2.57 | 4.96E-10 | -            | hypothetical protein                                                |
| 11230 | 2.55 | 1.49E-08 | -            | hypothetical protein                                                |
| 8260  | 2.55 | 9.04E-10 | -            | superoxide dismutase                                                |
| 6680  | 2.54 | 1.75E-07 | -            | catalase                                                            |

|       |      |          |             |                                                                         |
|-------|------|----------|-------------|-------------------------------------------------------------------------|
| 3410  | 2.54 | 9.00E-10 | -           | dihydroxyacetone kinase subunit DhaK                                    |
| 11610 | 2.53 | 6.05E-10 | -           | PTS lactose transporter subunit IIB                                     |
| 11590 | 2.53 | 1.74E-09 | -           | HAD family phosphatase                                                  |
| 2280  | 2.52 | 4.47E-08 | -           | NADH dehydrogenase subunit 5                                            |
| 8790  | 2.52 | 2.56E-10 | -           | aminopeptidase                                                          |
| 3700  | 2.52 | 4.62E-09 | -           | glycosyltransferase                                                     |
| 7600  | 2.51 | 3.93E-09 | -           | phage tail tape measure protein                                         |
| 8615  | 2.51 | 2.74E-10 | -           | hypothetical protein                                                    |
| 4290  | 2.49 | 2.06E-09 | -           | topoisomerase                                                           |
| 9275  | 2.48 | 2.18E-10 | -           | YtxH domain-containing protein                                          |
| 995   | 2.48 | 6.78E-10 | <i>ipdC</i> | indolepyruvate decarboxylase                                            |
| 13270 | 2.46 | 5.79E-09 | <i>pnbA</i> | carboxylesterase/lipase family protein                                  |
| 705   | 2.45 | 2.92E-10 | -           | Superoxide dismutase [Mn/Fe] 2                                          |
| 10465 | 2.44 | 2.06E-09 | -           | ABC-2 transporter family protein                                        |
| 10455 | 2.44 | 2.56E-09 | -           | membrane protein                                                        |
| 13685 | 2.44 | 5.69E-09 | -           | N-acetyltransferase                                                     |
| 990   | 2.43 | 8.25E-10 | <i>entB</i> | isochorismatase                                                         |
| 10065 | 2.42 | 2.20E-10 | -           | 2-hydroxyacid dehydrogenase                                             |
| 10070 | 2.41 | 2.23E-10 | -           | peroxiredoxin                                                           |
| 5620  | 2.40 | 3.33E-10 | <i>trx</i>  | thiol reductase thioredoxin                                             |
| 8620  | 2.40 | 2.31E-09 | -           | CsbD family protein                                                     |
| 4860  | 2.39 | 2.56E-10 | -           | hypothetical protein                                                    |
| 725   | 2.39 | 6.30E-07 | <i>deoD</i> | purine-nucleoside phosphorylase                                         |
| 9490  | 2.39 | 2.99E-10 | -           | membrane protein insertion efficiency factor YidD                       |
| 730   | 2.39 | 8.89E-08 | -           | tetracycline efflux MFS transporter Tet(38)                             |
| 7175  | 2.38 | 3.19E-09 | <i>msrA</i> | peptide-methionine (S)-S-oxide reductase                                |
| 6305  | 2.38 | 3.09E-10 | <i>ribF</i> | bifunctional riboflavin kinase/FMN adenylyltransferase                  |
| 14365 | 2.38 | 2.46E-09 | -           | accessory Sec system glycosyltransferase GtfA                           |
| 9105  | 2.37 | 4.96E-10 | -           | peroxiredoxin                                                           |
| 595   | 2.37 | 4.56E-10 | <i>sirC</i> | iron ABC transporter permease                                           |
| 14315 | 2.37 | 1.29E-06 | <i>isaB</i> | hypothetical protein                                                    |
| 14450 | 2.37 | 1.81E-09 | <i>tetR</i> | biofilm operon icaADBC HTH-type negative transcriptional regulator IcaR |
| 7475  | 2.36 | 5.20E-10 | -           | thioredoxin reductase                                                   |
| 8365  | 2.36 | 1.81E-09 | -           | hypothetical protein                                                    |
| 10925 | 2.36 | 3.01E-09 | -           | hydrolase in agr operon                                                 |
| 6805  | 2.35 | 3.38E-09 | -           | protein GlcT                                                            |
| 3335  | 2.35 | 8.58E-09 | -           | membrane protein                                                        |
| 2865  | 2.35 | 7.19E-10 | -           | Molecular chaperone Hsp31 and glyoxalase 3                              |
| 8360  | 2.33 | 8.74E-10 | -           | hypothetical protein                                                    |
| 12620 | 2.33 | 1.21E-09 | -           | MOSC domain-containing protein                                          |
| 7940  | 2.33 | 2.74E-10 | <i>zwf</i>  | glucose-6-phosphate dehydrogenase                                       |
| 8355  | 2.32 | 1.09E-09 | -           | hypothetical protein                                                    |
| 13420 | 2.32 | 4.00E-08 | -           | hypothetical protein                                                    |
| 10875 | 2.30 | 1.66E-09 | -           | N-acetyltransferase                                                     |

|       |      |          |             |                                                       |
|-------|------|----------|-------------|-------------------------------------------------------|
| 9770  | 2.30 | 1.44E-09 | -           | signal transduction protein TRAP                      |
| 4425  | 2.29 | 3.01E-10 | -           | iron-sulfur cluster assembly scaffold protein NifU    |
| 9875  | 2.29 | 5.10E-10 | -           | glucosamine-6-phosphate isomerase                     |
| 7295  | 2.29 | 1.22E-09 | -           | hypothetical protein                                  |
| 2285  | 2.28 | 1.22E-07 | -           | hypothetical protein                                  |
| 9870  | 2.28 | 6.51E-10 | -           | hypothetical protein                                  |
| 4415  | 2.28 | 3.58E-10 | <i>sufD</i> | Fe-S cluster assembly protein SufD                    |
| 14415 | 2.28 | 5.75E-10 | -           | hypothetical protein                                  |
| 11560 | 2.27 | 4.13E-10 | <i>czcD</i> | cation transporter                                    |
| 10390 | 2.26 | 1.81E-09 | -           | pectate lyase                                         |
| 3450  | 2.26 | 1.43E-09 | -           | N-acetyltransferase                                   |
| 8385  | 2.26 | 3.71E-08 | <i>prmA</i> | 50S ribosomal protein L11 methyltransferase           |
| 8390  | 2.26 | 4.83E-08 | <i>dnaJ</i> | molecular chaperone DnaJ                              |
| 220   | 2.26 | 5.28E-08 | -           | hypothetical protein                                  |
| 12285 | 2.26 | 1.96E-09 | <i>moeA</i> | molybdopterin molybdenumtransferase                   |
| 9455  | 2.25 | 2.82E-10 | -           | aldo/keto reductase                                   |
| 8880  | 2.25 | 8.12E-10 | <i>lysP</i> | gamma-aminobutyrate permease                          |
| 14630 | 2.25 | 4.87E-07 | -           | ABC transporter permease                              |
| 9235  | 2.25 | 3.52E-09 | -           | thiol reductase thioredoxin                           |
| 3415  | 2.24 | 1.43E-09 | -           | dihydroxyacetone kinase subunit L                     |
| 6060  | 2.24 | 2.99E-10 | <i>recG</i> | DNA helicase RecG                                     |
| 12560 | 2.23 | 3.64E-08 | -           | hypothetical protein                                  |
| 4865  | 2.22 | 1.55E-09 | -           | hypothetical protein                                  |
| 14350 | 2.22 | 1.26E-08 | -           | cysteine hydrolase                                    |
| 3955  | 2.22 | 3.29E-07 | -           | competence protein ComF                               |
| 5795  | 2.21 | 1.15E-08 | -           | hemolytic protein                                     |
| 5965  | 2.20 | 3.20E-10 | -           | hypothetical protein                                  |
| 4430  | 2.20 | 3.03E-10 | <i>sufB</i> | Fe-S cluster assembly protein SufB                    |
| 5790  | 2.20 | 5.80E-09 | -           | hemolytic protein                                     |
| 5810  | 2.19 | 4.43E-09 | -           | bacillithiol biosynthesis cysteine-adding enzyme BshC |
| 10460 | 2.19 | 1.88E-09 | -           | ABC transporter ATP-binding protein                   |
| 560   | 2.19 | 1.07E-07 | -           | oleate hydratase                                      |
| 13970 | 2.19 | 6.43E-10 | -           | amidohydrolase                                        |
| 12490 | 2.18 | 1.43E-09 | -           | YafY family transcriptional regulator                 |
| 4555  | 2.18 | 5.45E-10 | -           | iron-sulfur cluster assembly accessory protein        |
| 575   | 2.17 | 1.55E-07 | -           | hypothetical protein                                  |
| 2955  | 2.16 | 2.33E-09 | -           | glucosamine-6-phosphate deaminase                     |
| 6365  | 2.15 | 6.78E-10 | <i>cinA</i> | competence protein CinA                               |
| 6380  | 2.13 | 1.72E-09 | -           | hypothetical protein                                  |
| 8925  | 2.12 | 1.54E-09 | <i>polA</i> | DNA polymerase I                                      |
| 6815  | 2.12 | 6.78E-10 | -           | AI-2E family transporter                              |
| 7235  | 2.12 | 2.39E-09 | -           | hyperosmolarity resistance protein Ebh                |
| 12675 | 2.11 | 4.19E-09 | -           | 3-hydroxyacyl-CoA dehydrogenase                       |
| 4040  | 2.11 | 4.96E-10 | -           | RNase adaptor protein RapZ                            |

|       |      |          |              |                                                                       |
|-------|------|----------|--------------|-----------------------------------------------------------------------|
| 1415  | 2.11 | 5.37E-09 | -            | ribose transporter RbsU                                               |
| 4410  | 2.10 | 3.68E-10 | <i>sufC</i>  | ABC transporter ATP-binding protein                                   |
| 6200  | 2.09 | 2.33E-09 | <i>hslV</i>  | HslU--HslV peptidase proteolytic subunit                              |
| 7300  | 2.09 | 7.29E-09 | -            | hypothetical protein                                                  |
| 6685  | 2.08 | 5.89E-07 | -            | 50S ribosomal protein L33                                             |
| 6630  | 2.08 | 1.81E-09 | -            | hypothetical protein                                                  |
| 8915  | 2.07 | 1.78E-09 | <i>coaE</i>  | dephospho-CoA kinase                                                  |
| 11500 | 2.07 | 3.71E-08 | -            | membrane protein                                                      |
| 10260 | 2.05 | 6.68E-09 | -            | DNA polymerase III subunit epsilon                                    |
| 12260 | 2.04 | 4.96E-10 | <i>moaA</i>  | cyclic pyranopterin monophosphate synthase                            |
| 6215  | 2.04 | 2.20E-07 | -            | hypothetical protein                                                  |
| 12280 | 2.04 | 1.04E-09 | <i>mobB</i>  | molybdopterin-guanine dinucleotide biosynthesis protein B             |
| 9325  | 2.03 | 1.65E-08 | <i>rot</i>   | MarR family transcriptional regulator                                 |
| 10170 | 2.02 | 3.45E-09 | -            | protein-tyrosine-phosphatase                                          |
| 7060  | 2.02 | 6.25E-10 | -            | tellurite resistance protein Tela                                     |
| 5980  | 2.01 | 4.96E-10 | <i>coaBC</i> | phosphopantothenoylecysteine decarboxylase                            |
| 3420  | 2.01 | 1.92E-08 | -            | PTS-dependent dihydroxyacetone kinase phosphotransferase subunit DhaM |
| 12265 | 2.01 | 2.73E-09 | <i>mobA</i>  | molybdenum cofactor guanylyltransferase                               |
| 6465  | 2.00 | 8.62E-10 | -            | glutathione peroxidase                                                |
| 8920  | 2.00 | 1.34E-09 | <i>mutM</i>  | DNA-formamidopyrimidine glycosylase                                   |
| 4700  | 2.00 | 1.19E-08 | -            | hypothetical protein                                                  |
| 485   | 1.99 | 5.21E-08 | -            | LysR family transcriptional regulator                                 |
| 900   | 1.98 | 3.12E-08 | -            | cation transporter                                                    |
| 4670  | 1.98 | 3.12E-09 | <i>pgi</i>   | glucose-6-phosphate isomerase                                         |
| 6765  | 1.98 | 9.14E-09 | <i>acnA</i>  | aconitate hydratase                                                   |
| 14075 | 1.97 | 2.61E-08 | -            | L-lactate dehydrogenase                                               |
| 12420 | 1.96 | 2.81E-08 | -            | hypothetical protein                                                  |
| 7355  | 1.96 | 1.74E-09 | -            | N-acetyl-alpha-D-glucosaminyl L-malate synthase BshA                  |
| 14605 | 1.96 | 7.44E-08 | -            | DNA-binding protein                                                   |
| 6195  | 1.95 | 5.96E-09 | <i>xerC</i>  | tyrosine recombinase XerC                                             |
| 12940 | 1.94 | 2.03E-07 | -            | uroporphyrinogen-III C-methyltransferase                              |
| 12680 | 1.93 | 1.81E-09 | -            | hypothetical protein                                                  |
| 4445  | 1.93 | 3.79E-09 | -            | HlyC/CorC family transporter                                          |
| 14360 | 1.92 | 1.31E-08 | -            | accessory Sec system glycosylation chaperone GtfB                     |
| 5290  | 1.91 | 1.81E-09 | <i>ptsH</i>  | phosphocarrier protein HPr                                            |
| 3530  | 1.91 | 1.24E-09 | -            | LysR family transcriptional regulator                                 |
| 2350  | 1.90 | 3.01E-09 | -            | hypothetical protein                                                  |
| 6210  | 1.90 | 8.49E-09 | <i>codY</i>  | GTP-sensing pleiotropic transcriptional regulator CodY                |
| 11950 | 1.89 | 2.12E-07 | -            | hypothetical protein                                                  |
| 13280 | 1.89 | 3.41E-08 | -            | iron export ABC transporter permease subunit FetB                     |
| 6205  | 1.88 | 2.69E-09 | <i>hslU</i>  | HslU--HslV peptidase ATPase subunit                                   |
| 8955  | 1.88 | 2.03E-09 | <i>gltA</i>  | citrate synthase                                                      |
| 7050  | 1.88 | 5.23E-09 | -            | acylphosphatase                                                       |
| 10175 | 1.88 | 8.62E-10 | -            | hypothetical protein                                                  |

|       |      |          |             |                                                                   |
|-------|------|----------|-------------|-------------------------------------------------------------------|
| 6810  | 1.88 | 1.99E-07 | -           | hypothetical protein                                              |
| 14100 | 1.87 | 7.52E-10 | -           | class I fructose-bisphosphate aldolase                            |
| 8950  | 1.87 | 5.27E-09 | <i>icd</i>  | isocitrate dehydrogenase (NADP(+))                                |
| 3250  | 1.87 | 7.61E-09 | <i>sarA</i> | transcriptional regulator                                         |
| 5010  | 1.86 | 2.00E-06 | -           | putative holin-like toxin                                         |
| 12550 | 1.86 | 6.95E-09 | <i>glvC</i> | PTS alpha-glucoside transporter subunit IIBC                      |
| 3525  | 1.85 | 2.19E-09 | -           | hypothetical protein                                              |
| 4695  | 1.85 | 2.89E-09 | <i>rexA</i> | ATP-dependent helicase/nuclease subunit A                         |
| 14690 | 1.84 | 4.46E-09 | <i>trmE</i> | tRNA uridine-5-carboxymethylaminomethyl(34) synthesis GTPase MnmE |
| 9205  | 1.84 | 9.63E-09 | -           | membrane protein                                                  |
| 4165  | 1.84 | 2.14E-09 | <i>clfA</i> | clumping factor A                                                 |
| 14685 | 1.84 | 2.77E-09 | <i>gidA</i> | tRNA uridine-5-carboxymethylaminomethyl(34) synthesis enzyme MnmG |
| 7985  | 1.82 | 1.43E-09 | -           | membrane protein                                                  |
| 5295  | 1.82 | 2.10E-09 | <i>ptsI</i> | phosphoenolpyruvate--protein phosphotransferase                   |
| 13260 | 1.82 | 2.24E-09 | -           | hypothetical protein                                              |
| 7445  | 1.82 | 9.67E-09 | <i>rpsA</i> | 30S ribosomal protein S1                                          |
| 4690  | 1.82 | 2.81E-09 | <i>rexB</i> | ATP-dependent helicase/deoxyribonuclease subunit B                |
| 13845 | 1.81 | 9.50E-09 | -           | maltose O-acetyltransferase                                       |
| 1410  | 1.81 | 8.58E-09 | <i>rbsD</i> | D-ribose pyranase                                                 |
| 2965  | 1.81 | 4.26E-09 | -           | 6-phospho-3-hexuloisomerase                                       |
| 14115 | 1.81 | 9.94E-10 | -           | acetyl-CoA synthetase                                             |
| 14680 | 1.81 | 7.29E-09 | <i>gidB</i> | ribosomal RNA small subunit methyltransferase G                   |
| 13285 | 1.80 | 4.17E-09 | -           | ABC transporter ATP-binding protein                               |
| 7360  | 1.80 | 3.62E-09 | -           | hypothetical protein                                              |
| 5395  | 1.80 | 5.91E-08 | <i>potD</i> | spermidine/putrescine ABC transporter substrate-binding protein   |
| 11555 | 1.80 | 1.43E-09 | <i>arsR</i> | transcriptional regulator                                         |
| 6590  | 1.79 | 1.96E-07 | -           | hypothetical protein                                              |
| 12295 | 1.78 | 1.67E-08 | <i>moaB</i> | molybdenum cofactor biosynthesis protein                          |
| 2960  | 1.77 | 5.93E-09 | -           | 3-hexulose-6-phosphate synthase                                   |
| 6690  | 1.76 | 6.27E-07 | <i>rpmN</i> | 30S ribosomal protein S14                                         |
| 5365  | 1.75 | 4.25E-09 | <i>lpdA</i> | dihydrolipoyl dehydrogenase                                       |
| 11905 | 1.75 | 1.42E-07 | -           | MerR family transcriptional regulator                             |
| 5275  | 1.75 | 2.35E-09 | -           | hypothetical protein                                              |
| 5355  | 1.75 | 5.32E-09 | <i>pdhB</i> | pyruvate dehydrogenase E1 component subunit beta                  |
| 3495  | 1.75 | 1.55E-08 | -           | hypothetical protein                                              |
| 2290  | 1.74 | 7.23E-09 | -           | hypothetical protein                                              |
| 13765 | 1.74 | 1.06E-08 | -           | hypothetical protein                                              |
| 4885  | 1.73 | 9.44E-09 | -           | NAD(+) kinase                                                     |
| 13680 | 1.73 | 2.06E-09 | <i>srtA</i> | class A sortase SrtA                                              |
| 225   | 1.72 | 1.42E-08 | -           | ATPase AAA                                                        |
| 2050  | 1.72 | 1.97E-09 | -           | hypothetical protein                                              |
| 12485 | 1.72 | 3.33E-08 | -           | inositol monophosphatase                                          |
| 5070  | 1.71 | 1.60E-08 | -           | acetyltransferase                                                 |

|       |      |          |             |                                                                                           |
|-------|------|----------|-------------|-------------------------------------------------------------------------------------------|
| 3965  | 1.71 | 1.04E-08 | <i>secA</i> | preprotein translocase subunit SecA                                                       |
| 12800 | 1.70 | 4.92E-09 | -           | quinone oxidoreductase                                                                    |
| 5420  | 1.70 | 7.32E-08 | -           | inositol monophosphatase                                                                  |
| 1405  | 1.69 | 3.58E-09 | <i>rbsK</i> | ribokinase                                                                                |
| 14590 | 1.69 | 5.77E-09 | -           | DinB family protein                                                                       |
| 10060 | 1.69 | 4.18E-08 | -           | transcriptional repressor                                                                 |
| 13570 | 1.69 | 6.82E-09 | -           | hypothetical protein                                                                      |
| 7350  | 1.68 | 2.31E-09 | -           | CCA-adding enzyme                                                                         |
| 9365  | 1.68 | 6.68E-04 | <i>ribE</i> | riboflavin synthase                                                                       |
| 735   | 1.67 | 2.73E-07 | <i>deoC</i> | 2-deoxyribose-5-phosphate aldolase                                                        |
| 8835  | 1.67 | 1.71E-09 | <i>clpX</i> | ATP-dependent Clp protease ATP-binding subunit ClpX                                       |
| 12960 | 1.67 | 6.44E-07 | -           | N-acetyltransferase                                                                       |
| 4195  | 1.66 | 1.27E-07 | -           | hypothetical protein                                                                      |
| 12950 | 1.66 | 2.01E-07 | <i>nirB</i> | nitrite reductase large subunit                                                           |
| 5350  | 1.65 | 6.15E-09 | <i>pdhA</i> | pyruvate dehydrogenase E1 component subunit alpha                                         |
| 7115  | 1.65 | 4.33E-09 | <i>arlR</i> | DNA-binding response regulator                                                            |
| 13650 | 1.65 | 2.29E-08 | -           | glyoxalase                                                                                |
| 13965 | 1.64 | 1.18E-07 | -           | short-chain dehydrogenase                                                                 |
| 5360  | 1.64 | 2.80E-09 | -           | dihydrolipoyllysine-residue acetyltransferase component of pyruvate dehydrogenase complex |
| 3630  | 1.63 | 1.07E-07 | -           | deoxyribodipyrimidine photo-lyase                                                         |
| 13740 | 1.63 | 6.69E-08 | <i>ptsG</i> | PTS glucoside EIICBA component                                                            |
| 3535  | 1.63 | 1.64E-07 | -           | hypothetical protein                                                                      |
| 13410 | 1.63 | 5.10E-09 | -           | oxidoreductase                                                                            |
| 6165  | 1.63 | 3.73E-09 | <i>sucD</i> | succinyl-CoA ligase subunit alpha                                                         |
| 945   | 1.62 | 3.10E-08 | -           | MFS transporter                                                                           |
| 13205 | 1.62 | 3.72E-09 | -           | protein flp                                                                               |
| 9250  | 1.61 | 5.14E-09 | -           | MBL fold metallo-hydrolase                                                                |
| 4070  | 1.61 | 2.86E-08 | -           | DUF4887 domain-containing protein                                                         |
| 12275 | 1.61 | 5.24E-09 | <i>moaE</i> | molybdopterin synthase catalytic subunit                                                  |
| 2190  | 1.60 | 8.35E-08 | -           | hypothetical protein                                                                      |
| 11310 | 1.59 | 1.71E-09 | <i>fabZ</i> | beta-hydroxyacyl-ACP dehydratase                                                          |
| 4640  | 1.59 | 1.73E-08 | <i>rocD</i> | Ornithine aminotransferase 2                                                              |
| 4250  | 1.59 | 1.47E-08 | <i>aroD</i> | 3-dehydroquinase                                                                          |
| 65    | 1.59 | 4.48E-09 | -           | homoserine O-acetyltransferase                                                            |
| 13645 | 1.58 | 6.11E-07 | -           | N-acetyltransferase                                                                       |
| 7990  | 1.58 | 1.32E-08 | -           | hypothetical protein                                                                      |
| 5650  | 1.58 | 1.41E-08 | <i>murI</i> | glutamate racemase                                                                        |
| 11900 | 1.58 | 9.36E-09 | -           | aldo/keto reductase                                                                       |
| 1310  | 1.56 | 3.70E-09 | -           | 2-C-methyl-D-erythritol 4-phosphate cytidyltransferase                                    |
| 13960 | 1.56 | 7.54E-07 | -           | TetR family transcriptional regulator                                                     |
| 5610  | 1.55 | 1.70E-08 | -           | DNA polymerase/3'-5' exonuclease PolX                                                     |
| 3375  | 1.55 | 4.36E-09 | -           | ABC transporter ATP-binding protein                                                       |
| 3565  | 1.53 | 1.37E-08 | -           | hypothetical protein                                                                      |
| 4645  | 1.53 | 1.43E-08 | <i>gudB</i> | NAD-specific glutamate dehydrogenase                                                      |



|       |      |          |              |                                                                                              |
|-------|------|----------|--------------|----------------------------------------------------------------------------------------------|
| 11320 | 1.53 | 8.36E-09 | -            | membrane protein                                                                             |
| 12730 | 1.52 | 2.22E-08 | <i>tcaR</i>  | transcriptional regulator                                                                    |
| 12270 | 1.51 | 4.59E-06 | <i>moaD</i>  | molybdopterin synthase sulfur carrier subunit                                                |
| 14125 | 1.51 | 1.76E-06 | -            | hypothetical protein                                                                         |
| 6230  | 1.51 | 1.41E-08 | <i>tsf</i>   | elongation factor Ts                                                                         |
| 3065  | 1.51 | 5.63E-09 | <i>mvaD</i>  | diphosphomevalonate decarboxylase                                                            |
| 13615 | 1.50 | 4.35E-09 | -            | fructose 1,6-bisphosphatase                                                                  |
| 4995  | 1.49 | 8.55E-09 | -            | lipoate--protein ligase A                                                                    |
| 7695  | 1.49 | 2.39E-07 | -            | hypothetical protein                                                                         |
| 9340  | 1.49 | 8.49E-09 | -            | alpha/beta hydrolase                                                                         |
| 11770 | 1.48 | 2.73E-07 | -            | alanine racemase                                                                             |
| 6375  | 1.48 | 4.34E-09 | -            | ribonuclease Y                                                                               |
| 7945  | 1.48 | 4.26E-09 | -            | AraC family transcriptional regulator                                                        |
| 6850  | 1.48 | 3.21E-08 | -            | aminopeptidase                                                                               |
| 5190  | 1.48 | 8.28E-08 | <i>folD</i>  | bifunctional methylenetetrahydrofolate dehydrogenase/methenyltetrahydrofolate cyclohydrolase |
| 4380  | 1.48 | 3.22E-08 | -            | phage capsid protein                                                                         |
| 9185  | 1.47 | 3.31E-09 | <i>ccpA</i>  | catabolite control protein A                                                                 |
| 7090  | 1.47 | 2.13E-07 | -            | hypothetical protein                                                                         |
| 7590  | 1.46 | 7.89E-06 | -            | peptidase                                                                                    |
| 6905  | 1.46 | 1.28E-07 | -            | SWIM zinc finger family protein                                                              |
| 9360  | 1.46 | 1.12E-03 | <i>ribBA</i> | riboflavin biosynthesis protein RibBA                                                        |
| 4715  | 1.46 | 6.31E-09 | -            | HAD family phosphatase                                                                       |
| 8975  | 1.45 | 2.54E-07 | <i>pyk</i>   | pyruvate kinase                                                                              |
| 7095  | 1.45 | 8.45E-08 | -            | hypothetical protein                                                                         |
| 3545  | 1.45 | 1.14E-08 | -            | membrane protein                                                                             |
| 7515  | 1.45 | 1.87E-07 | -            | hypothetical protein                                                                         |
| 12300 | 1.45 | 3.77E-08 | <i>moeB</i>  | molybdopterin biosynthesis protein MoeB                                                      |
| 11705 | 1.44 | 2.97E-09 | -            | chromosome partitioning protein ParA                                                         |
| 11525 | 1.44 | 9.83E-05 | <i>dps</i>   | DNA starvation/stationary phase protection protein                                           |
| 13495 | 1.44 | 9.78E-08 | -            | MFS transporter                                                                              |
| 2380  | 1.44 | 1.28E-07 | <i>gltB</i>  | glutamate synthase large subunit                                                             |
| 4880  | 1.43 | 3.50E-08 | -            | GTP pyrophosphokinase                                                                        |
| 7345  | 1.42 | 6.44E-09 | <i>birA</i>  | bifunctional biotin--[acetyl-CoA-carboxylase] synthetase/biotin operon repressor             |
| 2395  | 1.42 | 2.06E-04 | <i>treP</i>  | PTS ascorbate transporter subunit IIA                                                        |
| 175   | 1.42 | 1.30E-07 | -            | type I restriction endonuclease                                                              |
| 10580 | 1.41 | 1.69E-06 | -            | hypothetical protein                                                                         |
| 5095  | 1.41 | 9.30E-09 | <i>menB</i>  | 1,4-dihydroxy-2-naphthoyl-CoA synthase                                                       |
| 8085  | 1.41 | 8.47E-08 | -            | membrane protein                                                                             |
| 3540  | 1.40 | 2.14E-08 | -            | MFS transporter                                                                              |
| 8335  | 1.40 | 1.45E-07 | <i>cdd</i>   | cytidine deaminase                                                                           |
| 1050  | 1.40 | 6.28E-08 | -            | RES domain-containing protein                                                                |
| 5440  | 1.39 | 7.29E-09 | -            | hypothetical protein                                                                         |
| 7290  | 1.39 | 4.29E-08 | -            | cell cycle protein GpsB                                                                      |

|       |      |          |              |                                                                                                   |
|-------|------|----------|--------------|---------------------------------------------------------------------------------------------------|
| 8340  | 1.39 | 1.64E-07 | <i>dgkA</i>  | diacylglycerol kinase                                                                             |
| 4005  | 1.39 | 2.99E-08 | <i>uvrA</i>  | excinuclease ABC subunit A                                                                        |
| 5320  | 1.39 | 1.59E-07 | -            | hypothetical protein                                                                              |
| 14030 | 1.38 | 1.60E-07 | -            | VOC family protein                                                                                |
| 12775 | 1.37 | 3.73E-08 | <i>mgo</i>   | malate:quinone oxidoreductase                                                                     |
| 8440  | 1.37 | 1.87E-08 | -            | ComE operon protein 2                                                                             |
| 10075 | 1.37 | 6.42E-09 | <i>hemL</i>  | glutamate-1-semialdehyde 2,1-aminomutase                                                          |
| 8310  | 1.36 | 7.68E-08 | -            | phosphoenolpyruvate synthetase regulatory protein                                                 |
| 8150  | 1.36 | 3.70E-07 | -            | membrane protein                                                                                  |
| 7100  | 1.36 | 2.13E-08 | <i>sucB</i>  | dihydrolipoyllysine-residue succinyltransferase component of 2-oxoglutarate dehydrogenase complex |
| 6160  | 1.36 | 2.44E-08 | <i>sucC</i>  | succinyl-CoA ligase subunit beta                                                                  |
| 13210 | 1.36 | 3.52E-08 | -            | NAD(P)-dependent oxidoreductase                                                                   |
| 12365 | 1.36 | 3.05E-07 | <i>ureC</i>  | urease subunit alpha                                                                              |
| 9355  | 1.35 | 1.04E-03 | <i>ribH</i>  | 6,7-dimethyl-8-ribityllumazine synthase                                                           |
| 9550  | 1.35 | 8.12E-06 | -            | hypothetical protein                                                                              |
| 14600 | 1.35 | 4.31E-08 | <i>rarD</i>  | protein RarD                                                                                      |
| 14580 | 1.35 | 1.01E-06 | -            | hypothetical protein                                                                              |
| 5085  | 1.35 | 2.44E-08 | <i>menD</i>  | 2-succinyl-5-enolpyruvyl-6-hydroxy-3- cyclohexene-1-carboxylate synthase                          |
| 2975  | 1.35 | 2.58E-08 | -            | proline/betaine transporter                                                                       |
| 14035 | 1.34 | 2.24E-07 | -            | TetR/AcrR family transcriptional regulator                                                        |
| 7105  | 1.34 | 5.35E-08 | <i>sucA</i>  | 2-oxoglutarate dehydrogenase E1 component                                                         |
| 1890  | 1.33 | 3.35E-08 | -            | metal-dependent hydrolase                                                                         |
| 170   | 1.32 | 6.18E-08 | -            | beta-lactam sensor/signal transducer MecR1                                                        |
| 5615  | 1.32 | 4.06E-08 | <i>mutS2</i> | endonuclease MutS2                                                                                |
| 4970  | 1.32 | 3.45E-08 | -            | bifunctional metallophosphatase/5'-nucleotidase                                                   |
| 3070  | 1.32 | 6.66E-09 | -            | phosphomevalonate kinase                                                                          |
| 3240  | 1.32 | 3.83E-08 | -            | hypothetical protein                                                                              |
| 3650  | 1.31 | 5.57E-08 | <i>norA</i>  | multidrug efflux MFS transporter NorA                                                             |
| 12985 | 1.31 | 1.06E-06 | -            | Txe/YoeB family addiction module toxin                                                            |
| 5315  | 1.31 | 4.77E-08 | <i>trkA</i>  | potassium transporter Trk                                                                         |
| 8980  | 1.31 | 3.52E-07 | <i>pfkA</i>  | ATP-dependent 6-phosphofructokinase                                                               |
| 3675  | 1.31 | 4.47E-06 | <i>fruA</i>  | PTS fructose transporter subunit IIC                                                              |
| 4775  | 1.31 | 6.71E-08 | <i>fabF</i>  | beta-ketoacyl-[acyl-carrier-protein] synthase II                                                  |
| 4240  | 1.31 | 3.25E-07 | -            | N-acetyltransferase                                                                               |
| 7110  | 1.29 | 1.55E-08 | <i>arlS</i>  | two-component sensor histidine kinase                                                             |
| 8350  | 1.28 | 6.26E-08 | <i>phoH</i>  | PhoH family protein                                                                               |
| 5985  | 1.27 | 1.44E-08 | <i>priA</i>  | primosomal protein N'                                                                             |
| 8345  | 1.27 | 9.58E-08 | -            | endoribonuclease YbeY                                                                             |
| 9800  | 1.27 | 1.51E-08 | <i>prsA</i>  | foldase                                                                                           |
| 3720  | 1.27 | 5.21E-08 | -            | hypothetical protein                                                                              |
| 5435  | 1.26 | 4.77E-08 | -            | DUF2197 domain-containing protein                                                                 |
| 10870 | 1.26 | 1.78E-06 | -            | potassium transporter KtrB                                                                        |
| 3595  | 1.26 | 3.18E-08 | -            | cysteine ABC transporter ATP-binding protein                                                      |

|       |      |          |              |                                                                 |
|-------|------|----------|--------------|-----------------------------------------------------------------|
| 10135 | 1.26 | 5.97E-08 | <i>sgtB</i>  | monofunctional glycosyltransferase                              |
| 3600  | 1.25 | 7.44E-08 | -            | cysteine ABC transporter ATP-binding protein                    |
| 5655  | 1.25 | 2.94E-07 | -            | non-canonical purine NTP pyrophosphatase                        |
| 4935  | 1.25 | 1.13E-08 | -            | diacylglycerol beta-glucosyltransferase                         |
| 10755 | 1.25 | 4.93E-07 | -            | ATPase                                                          |
| 12220 | 1.24 | 1.29E-06 | -            | hypothetical protein                                            |
| 10095 | 1.24 | 2.20E-08 | -            | hypothetical protein                                            |
| 12380 | 1.24 | 2.71E-07 | <i>ureG</i>  | urease accessory protein UreG                                   |
| 6825  | 1.24 | 2.49E-08 | <i>msrA</i>  | peptide-methionine (S)-S-oxide reductase                        |
| 8070  | 1.23 | 1.23E-06 | -            | hypothetical protein                                            |
| 8145  | 1.23 | 5.30E-08 | -            | hypothetical protein                                            |
| 10750 | 1.23 | 8.52E-07 | -            | recombinase                                                     |
| 1970  | 1.23 | 2.79E-07 | -            | toxin                                                           |
| 11315 | 1.22 | 1.00E-08 | <i>murA</i>  | UDP-N-acetylglucosamine 1-carboxyvinyltransferase               |
| 9085  | 1.22 | 1.74E-08 | -            | hypothetical protein                                            |
| 12375 | 1.21 | 3.45E-07 | <i>ureF</i>  | urease accessory protein UreF                                   |
| 11595 | 1.21 | 3.89E-07 | -            | iron ABC transporter ATP-binding protein                        |
| 12370 | 1.20 | 8.80E-06 | <i>ureE</i>  | urease accessory protein UreE                                   |
| 14420 | 1.20 | 5.44E-07 | -            | hypothetical protein                                            |
| 10130 | 1.20 | 8.47E-08 | -            | regulatory protein RecX                                         |
| 10410 | 1.19 | 4.08E-08 | <i>aldA2</i> | aldehyde dehydrogenase                                          |
| 5090  | 1.19 | 2.59E-08 | -            | 2-succinyl-6-hydroxy-2, 4-cyclohexadiene-1-carboxylate synthase |
| 7190  | 1.19 | 3.18E-08 | <i>thyA</i>  | thymidylate synthase                                            |
| 5300  | 1.19 | 3.26E-07 | -            | NrdH-redoxin                                                    |
| 9400  | 1.19 | 5.72E-08 | -            | hypothetical protein                                            |
| 13870 | 1.18 | 3.68E-08 | -            | N-succinyldiaminopimelate aminotransferase                      |
| 11505 | 1.18 | 1.42E-06 | <i>pdp</i>   | pyrimidine-nucleoside phosphorylase                             |
| 14020 | 1.18 | 3.99E-06 | -            | hypothetical protein                                            |
| 12850 | 1.18 | 1.85E-07 | -            | hypothetical protein                                            |
| 10785 | 1.17 | 3.92E-06 | -            | oxidoreductase                                                  |
| 45    | 1.17 | 6.59E-08 | <i>hutH</i>  | histidine ammonia-lyase                                         |
| 4925  | 1.17 | 2.39E-06 | -            | hypothetical protein                                            |
| 6320  | 1.16 | 2.81E-08 | -            | ribonuclease J 2                                                |
| 445   | 1.16 | 8.66E-07 | -            | MBL fold metallo-hydrolase                                      |
| 4875  | 1.14 | 5.90E-08 | -            | hypothetical protein                                            |
| 4200  | 1.14 | 1.35E-07 | -            | hypothetical protein                                            |
| 7950  | 1.14 | 2.56E-07 | -            | alpha-glucosidase                                               |
| 12385 | 1.14 | 3.37E-07 | <i>ureD</i>  | urease accessory protein                                        |
| 8095  | 1.13 | 7.87E-07 | -            | ATPase AAA                                                      |
| 13890 | 1.13 | 4.54E-07 | -            | diapolycopene oxygenase                                         |
| 4545  | 1.11 | 2.04E-06 | -            | NADH dehydrogenase family protein                               |
| 3345  | 1.11 | 2.34E-08 | <i>tagH</i>  | teichoic acids export ATP-binding protein TagH                  |
| 13175 | 1.11 | 6.23E-07 | -            | phosphohydrolase                                                |
| 2385  | 1.11 | 2.16E-05 | <i>gltD</i>  | glutamate synthase subunit beta                                 |

|       |      |          |                |                                                    |
|-------|------|----------|----------------|----------------------------------------------------|
| 3190  | 1.10 | 1.75E-06 | <i>adh</i>     | zinc-dependent alcohol dehydrogenase               |
| 4120  | 1.10 | 6.05E-08 | <i>rnr</i>     | ribonuclease R                                     |
| 4115  | 1.10 | 3.45E-08 | <i>est</i>     | carboxylesterase                                   |
| 25    | 1.09 | 5.32E-07 | <i>recF</i>    | DNA replication and repair protein RecF            |
| 10480 | 1.09 | 7.78E-05 | -              | hypothetical protein                               |
| 6945  | 1.09 | 3.71E-05 | <i>phoU</i>    | phosphate transport system regulatory protein PhoU |
| 3460  | 1.08 | 7.30E-08 | -              | DNA-binding response regulator                     |
| 4000  | 1.08 | 6.25E-07 | <i>uvrB</i>    | excinuclease ABC subunit B                         |
| 3695  | 1.08 | 6.60E-07 | -              | aldo/keto reductase                                |
| 12990 | 1.08 | 5.32E-06 | -              | prevent-host-death protein                         |
| 8800  | 1.06 | 4.61E-07 | <i>hemL</i>    | glutamate-1-semialdehyde 2,1-aminomutase           |
| 2195  | 1.05 | 4.13E-07 | -              | hypothetical protein                               |
| 13885 | 1.05 | 2.43E-07 | -              | 4,4'-diaponeurosporenoate glycosyltransferase      |
| 8805  | 1.05 | 6.15E-07 | <i>hemB</i>    | delta-aminolevulinic acid dehydratase              |
| 30    | 1.05 | 4.48E-07 | <i>gyrB</i>    | DNA gyrase subunit B                               |
| 8455  | 1.04 | 3.00E-07 | -              | ribosome silencing factor RsfS                     |
| 13310 | 1.04 | 1.14E-06 | -              | hypothetical protein                               |
| 5485  | 1.04 | 3.68E-07 | -              | regulator                                          |
| 1335  | 1.03 | 7.57E-07 | -              | ribitol-5-phosphate dehydrogenase                  |
| 2935  | 1.03 | 2.68E-06 | -              | glycosyl transferase family 1                      |
| 11710 | 1.03 | 1.90E-07 | -              | MFS transporter                                    |
| 6710  | 1.02 | 5.21E-06 | <i>lexA</i>    | LexA repressor                                     |
| 7540  | 1.02 | 2.12E-07 | <i>lukF-PV</i> | beta-channel forming cytotoxin                     |
| 5480  | 1.02 | 1.52E-06 | -              | hypothetical protein                               |
| 3455  | 1.02 | 7.91E-08 | -              | NAD(P)-dependent oxidoreductase                    |
| 1985  | 1.01 | 4.15E-07 | -              | transcriptional regulator                          |
| 2240  | 1.01 | 2.76E-05 | -              | tandem-type lipoprotein                            |
| 310   | 1.01 | 1.84E-07 | <i>arcC</i>    | carbamate kinase                                   |
| 4370  | 1.00 | 1.16E-05 | -              | hypothetical protein                               |
| 710   | 1.00 | 4.12E-05 | -              | hypothetical protein                               |

23 \*Locus\_tag: identifier corresponding to reference genome sequence, prefix to all  
24 numbers listed is "SAUSA300\_RS", \*\*logFC: log<sub>2</sub> fold change, \*\*\*FDR: false  
25 discovery rate.

26

27 **Supplementary Table 2d.** MRSA USA300 down-regulated genes following 1 h  
28 treatment with 2 μM PBT2 and 50 μM zinc in CAMHB grown at 37°C.

| Locus_tag* | LogFC** | FDR***   | Gene        | Putative gene product function                  |
|------------|---------|----------|-------------|-------------------------------------------------|
| 3325       | -7.80   | 3.55E-12 | <i>znuC</i> | phosphonate ABC transporter ATP-binding protein |
| 3320       | -7.46   | 3.55E-12 | <i>znuB</i> | metal ABC transporter permease                  |

|       |       |          |             |                                                                                           |
|-------|-------|----------|-------------|-------------------------------------------------------------------------------------------|
| 915   | -7.43 | 2.18E-10 | <i>tauB</i> | sulfonate ABC transporter ATP-binding protein                                             |
| 3315  | -7.30 | 5.46E-12 | <i>znuA</i> | metal ABC transporter substrate-binding protein                                           |
| 5540  | -6.61 | 3.16E-10 | <i>isdA</i> | iron-regulated surface determinant protein A                                              |
| 1635  | -6.36 | 2.18E-10 | -           | 5'-nucleotidase, lipoprotein e(P4) family                                                 |
| 920   | -6.32 | 9.59E-11 | -           | hypothetical protein                                                                      |
| 925   | -6.27 | 6.44E-10 | -           | ABC transporter permease                                                                  |
| 2060  | -6.22 | 6.55E-11 | <i>xpt</i>  | xanthine phosphoribosyltransferase                                                        |
| 910   | -6.20 | 2.18E-10 | -           | hypothetical protein                                                                      |
| 5050  | -5.38 | 2.92E-10 | -           | hypothetical protein                                                                      |
| 1790  | -5.34 | 8.76E-11 | <i>glpT</i> | glycerol-3-phosphate transporter                                                          |
| 1510  | -5.28 | 5.87E-10 | -           | protein EssB                                                                              |
| 2065  | -5.20 | 1.15E-11 | <i>pbuX</i> | xanthine permease                                                                         |
| 4185  | -5.04 | 6.55E-11 | <i>nuc</i>  | thermonuclease                                                                            |
| 13355 | -4.88 | 3.82E-10 | -           | hypothetical protein                                                                      |
| 605   | -4.83 | 1.12E-08 | <i>sirA</i> | iron ABC transporter substrate-binding protein                                            |
| 5550  | -4.67 | 2.23E-08 | -           | hypothetical protein                                                                      |
| 1495  | -4.58 | 2.09E-10 | -           | type VII secretion protein EsaA                                                           |
| 1470  | -4.48 | 2.18E-10 | -           | hypothetical protein                                                                      |
| 11760 | -4.48 | 3.52E-09 | -           | ABC transporter substrate-binding protein                                                 |
| 7830  | -4.47 | 5.75E-10 | -           | hypothetical protein                                                                      |
| 5545  | -4.46 | 1.24E-08 | -           | iron-regulated surface determinant protein C                                              |
| 12500 | -4.42 | 1.55E-10 | -           | CPBP family intramembrane metalloprotease                                                 |
| 1515  | -4.40 | 1.89E-10 | -           | protein EssC                                                                              |
| 6435  | -4.28 | 2.03E-10 | <i>glpF</i> | aquaporin family protein                                                                  |
| 4985  | -4.21 | 6.99E-10 | <i>comK</i> | competence protein ComK                                                                   |
| 12155 | -4.18 | 1.14E-09 | <i>rpsJ</i> | 30S ribosomal protein S10                                                                 |
| 12645 | -4.12 | 1.10E-09 | -           | sodium ABC transporter ATP-binding protein                                                |
| 5915  | -4.08 | 1.58E-09 | <i>pyrR</i> | bifunctional pyrimidine operon transcriptional regulator/uracil phosphoribosyltransferase |
| 9520  | -4.06 | 3.31E-09 | -           | hypothetical protein                                                                      |
| 13365 | -4.04 | 3.09E-09 | -           | diaminopimelate epimerase                                                                 |
| 11755 | -4.02 | 1.04E-08 | -           | iron ABC transporter permease                                                             |
| 3435  | -4.02 | 1.43E-09 | -           | alpha/beta hydrolase                                                                      |
| 3825  | -4.01 | 1.21E-09 | -           | MFS transporter                                                                           |
| 8910  | -4.00 | 1.43E-10 | <i>gap</i>  | aldehyde dehydrogenase                                                                    |
| 13335 | -3.99 | 2.41E-09 | -           | ABC transporter ATP-binding protein                                                       |
| 1025  | -3.92 | 9.48E-11 | -           | MurR/RpiR family transcriptional regulator                                                |
| 10300 | -3.92 | 2.35E-10 | <i>gatC</i> | Asp-tRNA(Asn)/Glu-tRNA(Gln) amidotransferase GatCAB subunit C                             |
| 6440  | -3.91 | 1.21E-10 | <i>glpK</i> | glycerol kinase                                                                           |
| 1065  | -3.91 | 9.16E-09 | -           | ABC transporter permease                                                                  |
| 1020  | -3.89 | 1.86E-10 | -           | permease                                                                                  |
| 4220  | -3.88 | 3.46E-09 | -           | hypothetical protein                                                                      |
| 7075  | -3.88 | 5.43E-10 | <i>brnQ</i> | branched-chain amino acid transport system II carrier protein                             |
| 1680  | -3.87 | 2.10E-09 | <i>nanA</i> | N-acetylneuraminate lyase                                                                 |

|       |       |          |              |                                                           |
|-------|-------|----------|--------------|-----------------------------------------------------------|
| 12150 | -3.87 | 4.05E-10 | <i>rplC</i>  | 50S ribosomal protein L3                                  |
| 1500  | -3.84 | 5.55E-09 | -            | protein EssA                                              |
| 930   | -3.84 | 2.18E-10 | -            | acyl-CoA dehydrogenase                                    |
| 2180  | -3.82 | 7.52E-10 | -            | restriction endonuclease subunit S                        |
| 1015  | -3.81 | 6.39E-10 | -            | N-acetylmuramic acid 6-phosphate etherase                 |
| 1875  | -3.80 | 9.02E-10 | <i>ltrA</i>  | hypothetical protein                                      |
| 1465  | -3.75 | 2.36E-09 | -            | ABC transporter permease                                  |
| 5375  | -3.74 | 2.07E-09 | -            | XRE family transcriptional regulator                      |
| 12415 | -3.74 | 7.80E-10 | <i>ssaA</i>  | CHAP domain-containing protein                            |
| 14175 | -3.73 | 4.47E-10 | <i>nrdD</i>  | anaerobic ribonucleoside-triphosphate reductase           |
| 7835  | -3.72 | 5.87E-10 | -            | hypothetical protein                                      |
| 12145 | -3.72 | 3.60E-09 | <i>rplD</i>  | 50S ribosomal protein L4                                  |
| 4320  | -3.71 | 6.05E-10 | <i>sek</i>   | exotoxin                                                  |
| 12140 | -3.70 | 1.88E-09 | <i>rplW</i>  | 50S ribosomal protein L23                                 |
| 12555 | -3.69 | 5.52E-10 | -            | MurR/RpiR family transcriptional regulator                |
| 7405  | -3.64 | 1.45E-10 | <i>ndk</i>   | nucleoside-diphosphate kinase                             |
| 3120  | -3.64 | 9.28E-09 | -            | hypothetical protein                                      |
| 1170  | -3.63 | 1.81E-09 | -            | glycerophosphoryl diester phosphodiesterase               |
| 3115  | -3.62 | 9.53E-10 | -            | DUF443 domain-containing protein                          |
| 12440 | -3.61 | 2.04E-06 | <i>ssaA</i>  | CHAP domain-containing protein                            |
| 13360 | -3.61 | 1.07E-08 | -            | hypothetical protein                                      |
| 600   | -3.60 | 2.45E-09 | <i>sirB</i>  | iron ABC transporter permease                             |
| 7825  | -3.60 | 4.96E-09 | -            | transcriptional regulator                                 |
| 8540  | -3.58 | 3.11E-09 | -            | allophanate hydrolase                                     |
| 3140  | -3.57 | 7.85E-09 | -            | DUF443 domain-containing protein                          |
| 12660 | -3.56 | 1.10E-08 | <i>gltS</i>  | sodium/glutamate symporter                                |
| 2070  | -3.55 | 2.12E-10 | <i>guaB</i>  | IMP dehydrogenase                                         |
| 10530 | -3.53 | 2.11E-08 | <i>chs</i>   | chemotaxis inhibitory protein                             |
| 12130 | -3.52 | 2.97E-09 | <i>rpsS</i>  | 30S ribosomal protein S19                                 |
| 3850  | -3.51 | 4.44E-09 | -            | ribonucleotide-diphosphate reductase subunit beta         |
| 6565  | -3.50 | 1.08E-08 | -            | hypothetical protein                                      |
| 3125  | -3.48 | 5.40E-09 | -            | hypothetical protein                                      |
| 12125 | -3.48 | 1.09E-08 | <i>rplV</i>  | 50S ribosomal protein L22                                 |
| 1520  | -3.47 | 8.87E-07 | -            | protein EsaC                                              |
| 12115 | -3.46 | 1.60E-09 | <i>rplP</i>  | 50S ribosomal protein L16                                 |
| 8535  | -3.46 | 3.00E-09 | -            | allophanate hydrolase                                     |
| 4510  | -3.46 | 6.73E-09 | -            | teichoic acid D-Ala incorporation-associated protein DltX |
| 1675  | -3.45 | 1.61E-09 | -            | hypothetical protein                                      |
| 2925  | -3.45 | 8.62E-10 | <i>sdrE</i>  | MSCRAMM family adhesin SdrE                               |
| 1685  | -3.44 | 9.00E-10 | -            | ROK family protein                                        |
| 13180 | -3.44 | 1.89E-10 | -            | alanine glycine permease                                  |
| 860   | -3.40 | 3.02E-09 | <i>cap5L</i> | glycosyltransferase WbuB                                  |
| 12110 | -3.40 | 1.88E-09 | <i>rpmC</i>  | 50S ribosomal protein L29                                 |
| 9435  | -3.39 | 1.37E-08 | -            | camphor resistance protein CrcB                           |

|       |       |          |              |                                                                                              |
|-------|-------|----------|--------------|----------------------------------------------------------------------------------------------|
| 12120 | -3.37 | 1.81E-09 | <i>rpsC</i>  | 30S ribosomal protein S3                                                                     |
| 12105 | -3.37 | 5.17E-10 | <i>rpsQ</i>  | 30S ribosomal protein S17                                                                    |
| 9415  | -3.35 | 9.15E-09 | -            | hypothetical protein                                                                         |
| 12100 | -3.34 | 4.96E-10 | <i>rplN</i>  | 50S ribosomal protein L14                                                                    |
| 13915 | -3.34 | 2.21E-08 | <i>isaA</i>  | transglycosylase IsaA                                                                        |
| 12870 | -3.34 | 1.26E-09 | <i>glT</i>   | proton/sodium-glutamate symport protein GlT                                                  |
| 9620  | -3.33 | 3.93E-09 | <i>splA</i>  | serine protease SplA                                                                         |
| 13330 | -3.33 | 3.26E-08 | -            | ABC transporter ATP-binding protein                                                          |
| 8520  | -3.33 | 3.16E-09 | -            | hypothetical protein                                                                         |
| 2075  | -3.32 | 1.03E-10 | <i>guaA</i>  | GMP synthase (glutamine-hydrolyzing)                                                         |
| 4515  | -3.32 | 2.00E-10 | <i>dltA</i>  | D-alanine--poly(phosphoribitol) ligase                                                       |
| 130   | -3.31 | 3.02E-09 | -            | multifunctional 2',3'-cyclic-nucleotide 2'-phosphodiesterase/5'-nucleotidase/3'-nucleotidase |
| 12095 | -3.31 | 3.20E-10 | <i>rplX</i>  | 50S ribosomal protein L24                                                                    |
| 9525  | -3.29 | 4.95E-08 | -            | hypothetical protein                                                                         |
| 5780  | -3.29 | 1.46E-08 | -            | hypothetical protein                                                                         |
| 6250  | -3.29 | 3.52E-10 | <i>cdsA</i>  | phosphatidate cytidylyltransferase                                                           |
| 4570  | -3.28 | 4.72E-09 | -            | sodium:proton antiporter                                                                     |
| 1720  | -3.26 | 1.05E-07 | -            | hypothetical protein                                                                         |
| 8525  | -3.24 | 4.96E-10 | <i>accC</i>  | acetyl-CoA carboxylase biotin carboxylase subunit                                            |
| 5200  | -3.24 | 4.39E-07 | <i>purK</i>  | 5-(carboxyamino)imidazole ribonucleotide synthase                                            |
| 855   | -3.24 | 5.96E-09 | <i>cap5K</i> | capsular polysaccharide biosynthesis protein                                                 |
| 12090 | -3.22 | 4.45E-10 | <i>rplE</i>  | 50S ribosomal protein L5                                                                     |
| 9600  | -3.21 | 3.24E-08 | <i>splE</i>  | serine protease SplE                                                                         |
| 7020  | -3.21 | 4.69E-09 | <i>alr2</i>  | alanine racemase 2                                                                           |
| 2710  | -3.19 | 1.86E-10 | <i>nupC</i>  | pyrimidine nucleoside transporter NupC                                                       |
| 2320  | -3.19 | 1.88E-07 | <i>cysM</i>  | cysteine synthase                                                                            |
| 13900 | -3.18 | 1.28E-09 | -            | CHAP domain-containing protein                                                               |
| 13340 | -3.16 | 1.73E-08 | -            | nickel ABC transporter permease                                                              |
| 5380  | -3.15 | 8.96E-09 | <i>potA</i>  | spermidine/putrescine import ATP-binding protein PotA                                        |
| 5570  | -3.14 | 2.14E-06 | -            | monooxygenase IsdI                                                                           |
| 9630  | -3.14 | 6.75E-09 | -            | hypothetical protein                                                                         |
| 10295 | -3.14 | 3.03E-10 | <i>gatA</i>  | Asp-tRNA(Asn)/Glu-tRNA(Gln) amidotransferase GatCAB subunit A                                |
| 8530  | -3.14 | 9.44E-09 | <i>accB</i>  | acetyl-CoA carboxylase biotin carboxyl carrier protein subunit                               |
| 14180 | -3.13 | 1.88E-09 | -            | citrate transporter                                                                          |
| 9835  | -3.13 | 2.00E-08 | -            | transcriptional regulator                                                                    |
| 5210  | -3.12 | 6.11E-08 | <i>purS</i>  | phosphoribosylformylglycinamide synthase                                                     |
| 865   | -3.12 | 3.61E-09 | <i>cap5M</i> | sugar transferase                                                                            |
| 11740 | -3.10 | 1.08E-09 | -            | hypothetical protein                                                                         |
| 5990  | -3.10 | 6.91E-10 | -            | hypothetical protein                                                                         |
| 835   | -3.09 | 5.06E-08 | <i>cap5G</i> | UDP-N-acetylglucosamine 2-epimerase (non-hydrolyzing)                                        |
| 10980 | -3.08 | 1.82E-08 | -            | oxidoreductase                                                                               |
| 9465  | -3.08 | 2.14E-08 | <i>metK</i>  | S-adenosylmethionine synthase                                                                |
| 14525 | -3.08 | 2.98E-08 | -            | ATP phosphoribosyltransferase regulatory subunit                                             |

|       |       |          |               |                                                                         |
|-------|-------|----------|---------------|-------------------------------------------------------------------------|
| 6760  | -3.07 | 3.20E-10 | <i>opuD</i>   | glycine/betaine ABC transporter                                         |
| 1770  | -3.07 | 4.79E-09 | -             | hypothetical protein                                                    |
| 5555  | -3.06 | 1.50E-07 | -             | heme uptake system protein IsdE                                         |
| 7840  | -3.06 | 9.14E-10 | -             | hypothetical protein                                                    |
| 1360  | -3.03 | 1.13E-09 | -             | DNA-binding response regulator                                          |
| 840   | -3.02 | 1.23E-08 | <i>cap5H</i>  | O-acetyltransferase                                                     |
| 4655  | -3.01 | 1.14E-08 | <i>glpQ</i>   | glycerophosphodiester phosphodiesterase                                 |
| 6335  | -3.01 | 2.50E-10 | -             | peptidase M16                                                           |
| 1810  | -3.01 | 1.12E-09 | -             | membrane protein                                                        |
| 3370  | -3.00 | 5.34E-08 | <i>pbp4</i>   | D-alanyl-D-alanine carboxypeptidase                                     |
| 1695  | -3.00 | 1.18E-09 | -             | N-acetylmannosamine-6-phosphate 2-epimerase                             |
| 870   | -2.97 | 2.55E-09 | <i>cap5N</i>  | UDP-glucose 4-epimerase                                                 |
| 830   | -2.97 | 2.98E-08 | <i>cap5F</i>  | capsular polysaccharide biosynthesis protein Cap8F                      |
| 12600 | -2.97 | 2.86E-08 | <i>fosB</i>   | metallothiol transferase FosB                                           |
| 10865 | -2.96 | 3.79E-07 | -             | ferrichrome-binding protein FhuD                                        |
| 12085 | -2.96 | 7.43E-10 | <i>rpsN</i>   | 30S ribosomal protein S14 type Z                                        |
| 4325  | -2.96 | 1.03E-09 | <i>seq</i>    | enterotoxin                                                             |
| 11295 | -2.96 | 1.04E-08 | -             | transglycosylase SceD                                                   |
| 1525  | -2.96 | 8.95E-09 | -             | virulence factor EsxB                                                   |
| 3135  | -2.95 | 1.27E-07 | -             | hypothetical protein                                                    |
| 825   | -2.95 | 2.69E-08 | <i>cap5E</i>  | UDP-glucose 4-epimerase                                                 |
| 13910 | -2.93 | 2.62E-08 | -             | N-acetyltransferase                                                     |
| 4330  | -2.93 | 1.25E-09 | -             | hypothetical protein                                                    |
| 14170 | -2.93 | 4.34E-09 | <i>nrdG</i>   | anaerobic ribonucleoside-triphosphate reductase activating protein      |
| 13905 | -2.92 | 1.54E-10 | -             | O-acetyltransferase OatA                                                |
| 10535 | -2.92 | 2.11E-09 | -             | peptidoglycan hydrolase                                                 |
| 1395  | -2.92 | 8.12E-08 | -             | SAM-dependent methyltransferase                                         |
| 2870  | -2.92 | 1.43E-09 | -             | ribulokinase                                                            |
| 3020  | -2.91 | 4.30E-09 | -             | hypothetical protein                                                    |
| 14015 | -2.90 | 1.86E-09 | <i>pyrD</i>   | dihydroorotate dehydrogenase (quinone)                                  |
| 13350 | -2.89 | 9.83E-10 | <i>opp-1A</i> | nickel ABC transporter, nickel/metallophore periplasmic binding protein |
| 845   | -2.89 | 1.04E-08 | <i>cap5I</i>  | capsular polysaccharide biosynthesis protein                            |
| 4485  | -2.88 | 2.42E-07 | -             | hypothetical protein                                                    |
| 2895  | -2.87 | 1.41E-08 | -             | deoxynucleoside kinase                                                  |
| 5205  | -2.87 | 7.05E-06 | <i>purC</i>   | phosphoribosylaminoimidazolesuccinocarboxamide synthase                 |
| 3395  | -2.87 | 1.87E-09 | <i>fhuA</i>   | ABC transporter ATP-binding protein                                     |
| 12875 | -2.85 | 1.78E-08 | -             | hypothetical protein                                                    |
| 5470  | -2.84 | 7.21E-09 | -             | membrane protein                                                        |
| 8960  | -2.83 | 2.01E-09 | -             | alanine glycine permease                                                |
| 815   | -2.83 | 1.52E-08 | <i>cap5C</i>  | capsular polysaccharide biosynthesis protein Cap8C                      |
| 5215  | -2.83 | 1.26E-07 | <i>purQ</i>   | phosphoribosylformylglycinamide synthase subunit PurQ                   |
| 4855  | -2.81 | 8.36E-09 | <i>pepF</i>   | oligoendopeptidase F                                                    |
| 1070  | -2.81 | 5.69E-09 | -             | peptide ABC transporter substrate-binding protein                       |



|       |       |          |              |                                                                   |
|-------|-------|----------|--------------|-------------------------------------------------------------------|
| 2175  | -2.80 | 7.37E-09 | <i>hsdM</i>  | type I restriction-modification system subunit M                  |
| 9310  | -2.80 | 1.55E-08 | -            | MFS transporter                                                   |
| 8565  | -2.79 | 5.77E-09 | -            | O-methyltransferase                                               |
| 13185 | -2.79 | 7.52E-10 | -            | sodium:proton antiporter                                          |
| 10290 | -2.79 | 3.33E-10 | <i>gatB</i>  | Asp-tRNA(Asn)/Glu-tRNA(Gln) amidotransferase GatCAB subunit B     |
| 10910 | -2.79 | 5.96E-10 | -            | CPBP family intramembrane metalloprotease                         |
| 8515  | -2.78 | 5.10E-09 | -            | divalent metal cation transporter                                 |
| 1765  | -2.78 | 3.09E-07 | -            | PTS ascorbate transporter subunit IIA                             |
| 6675  | -2.78 | 1.54E-10 | -            | gamma-aminobutyrate permease                                      |
| 12080 | -2.77 | 8.74E-10 | <i>rpsH</i>  | 30S ribosomal protein S8                                          |
| 11545 | -2.77 | 3.16E-10 | <i>manA</i>  | mannose-6-phosphate isomerase                                     |
| 11405 | -2.77 | 1.95E-08 | -            | protein-(glutamine-N5) methyltransferase, release factor-specific |
| 6535  | -2.76 | 2.25E-08 | -            | hypothetical protein                                              |
| 14700 | -2.76 | 5.35E-09 | <i>rpmH</i>  | 50S ribosomal protein L34                                         |
| 3400  | -2.75 | 1.23E-08 | <i>fhuB</i>  | iron ABC transporter permease                                     |
| 9615  | -2.75 | 5.96E-09 | <i>splB</i>  | serine protease SplB                                              |
| 875   | -2.75 | 2.45E-10 | <i>cap5O</i> | nucleotide sugar dehydrogenase                                    |
| 8675  | -2.74 | 1.21E-09 | <i>recJ</i>  | single-stranded-DNA-specific exonuclease RecJ                     |
| 8650  | -2.71 | 2.98E-08 | <i>hisS</i>  | histidine--tRNA ligase                                            |
| 2330  | -2.70 | 3.59E-07 | -            | methionine import ATP-binding protein MetN 1                      |
| 12445 | -2.70 | 1.48E-06 | -            | hypothetical protein                                              |
| 11345 | -2.69 | 9.15E-09 | <i>atpA</i>  | ATP synthase subunit alpha                                        |
| 1610  | -2.67 | 1.40E-07 | -            | TIGR01741 family protein                                          |
| 11340 | -2.66 | 1.81E-09 | <i>atpG</i>  | ATP synthase subunit gamma                                        |
| 11265 | -2.66 | 5.68E-09 | <i>oxaA</i>  | protein translocase component YidC                                |
| 2365  | -2.65 | 2.79E-08 | -            | hypothetical protein                                              |
| 12970 | -2.65 | 1.15E-06 | -            | hypothetical protein                                              |
| 810   | -2.63 | 2.63E-08 | <i>cap5B</i> | capsular polysaccharide biosynthesis protein Cap5B                |
| 10815 | -2.63 | 1.44E-09 | -            | ATP-dependent helicase                                            |
| 985   | -2.62 | 3.35E-10 | <i>brnQ</i>  | branched-chain amino acid transporter II carrier protein          |
| 11005 | -2.60 | 8.69E-09 | -            | DNA mismatch repair protein MutS                                  |
| 1760  | -2.60 | 3.04E-08 | -            | PTS lactose transporter subunit IIB                               |
| 880   | -2.59 | 2.56E-10 | -            | UDP-N-acetylglucosamine 2-epimerase (non-hydrolyzing)             |
| 1755  | -2.58 | 6.15E-09 | -            | PTS ascorbate transporter subunit IIC                             |
| 9440  | -2.58 | 4.32E-08 | -            | camphor resistance protein CrcB                                   |
| 10215 | -2.58 | 2.87E-09 | -            | membrane protein                                                  |
| 6635  | -2.57 | 1.64E-09 | -            | hypothetical protein                                              |
| 13265 | -2.57 | 2.61E-08 | -            | amino acid:proton symporter                                       |
| 5385  | -2.55 | 3.07E-08 | <i>potB</i>  | spermidine/putrescine ABC transporter permease                    |
| 11410 | -2.54 | 3.64E-09 | <i>prfA</i>  | peptide chain release factor 1                                    |
| 11750 | -2.53 | 1.11E-08 | -            | iron-dicitrate ABC transporter permease                           |
| 3025  | -2.52 | 1.43E-08 | -            | DUF423 domain-containing protein                                  |
| 5390  | -2.52 | 1.31E-08 | <i>potC</i>  | spermidine/putrescine ABC transporter permease                    |

|       |       |          |              |                                                           |
|-------|-------|----------|--------------|-----------------------------------------------------------|
| 12690 | -2.52 | 3.49E-08 | -            | hypothetical protein                                      |
| 12865 | -2.52 | 2.46E-09 | -            | DUF4889 domain-containing protein                         |
| 9135  | -2.52 | 4.32E-09 | -            | 1-acyl-sn-glycerol-3-phosphate acyltransferase            |
| 11350 | -2.51 | 2.07E-09 | <i>atpH</i>  | ATP synthase subunit delta                                |
| 1485  | -2.51 | 1.42E-08 | -            | CHAP domain-containing protein                            |
| 10375 | -2.51 | 5.66E-09 | <i>pheA</i>  | prephenate dehydratase                                    |
| 4205  | -2.51 | 9.71E-09 | -            | hypothetical protein                                      |
| 4145  | -2.51 | 1.25E-09 | -            | DUF5067 domain-containing protein                         |
| 11540 | -2.50 | 2.95E-08 | -            | hypothetical protein                                      |
| 11355 | -2.50 | 1.04E-08 | <i>atpF</i>  | ATP synthase subunit B                                    |
| 11415 | -2.50 | 1.45E-09 | <i>tdk</i>   | thymidine kinase                                          |
| 12075 | -2.49 | 4.66E-09 | <i>rplF</i>  | 50S ribosomal protein L6                                  |
| 5890  | -2.49 | 7.52E-10 | <i>ileS</i>  | isoleucine--tRNA ligase                                   |
| 5465  | -2.49 | 5.10E-09 | <i>cyoE</i>  | protoheme IX farnesyltransferase                          |
| 5045  | -2.48 | 1.56E-09 | -            | glycosyl transferase family 1                             |
| 3015  | -2.48 | 2.81E-09 | <i>ung</i>   | uracil-DNA glycosylase                                    |
| 9605  | -2.48 | 1.78E-08 | <i>splD</i>  | serine protease SplD                                      |
| 3490  | -2.48 | 5.72E-07 | -            | peptidase M23                                             |
| 10340 | -2.48 | 2.33E-09 | -            | staphopain A                                              |
| 11395 | -2.48 | 5.96E-09 | -            | protein-tyrosine-phosphatase                              |
| 10445 | -2.47 | 5.93E-09 | -            | membrane protein                                          |
| 10305 | -2.47 | 5.69E-09 | <i>putP</i>  | sodium:proline symporter                                  |
| 3205  | -2.46 | 1.47E-09 | <i>argS</i>  | arginine--tRNA ligase                                     |
| 1590  | -2.45 | 8.69E-08 | -            | TIGR01741 family protein                                  |
| 2475  | -2.45 | 5.59E-10 | <i>holB</i>  | DNA polymerase III subunit delta'                         |
| 2615  | -2.45 | 6.96E-09 | -            | tRNA(Ile)-lysidine synthetase                             |
| 5115  | -2.45 | 6.73E-08 | -            | N-acetyl-L,L-diaminopimelate aminotransferase             |
| 5595  | -2.45 | 2.11E-08 | <i>rmhC</i>  | ribonuclease HIII                                         |
| 3380  | -2.44 | 3.44E-10 | -            | nucleoside permease                                       |
| 9610  | -2.44 | 2.99E-09 | <i>splC</i>  | serine protease SplC                                      |
| 1460  | -2.43 | 5.28E-08 | -            | ABC transporter permease                                  |
| 1035  | -2.43 | 5.87E-10 | <i>hsdR</i>  | type-1 restriction enzyme R protein                       |
| 3895  | -2.43 | 1.21E-06 | -            | GrpB family protein                                       |
| 9595  | -2.42 | 2.59E-08 | <i>splF</i>  | serine protease SplF                                      |
| 9130  | -2.42 | 4.96E-10 | <i>nagE</i>  | PTS glucose transporter subunit IIBC                      |
| 11335 | -2.41 | 3.13E-09 | <i>atpD</i>  | ATP synthase subunit beta                                 |
| 14510 | -2.41 | 6.69E-08 | <i>hisC</i>  | histidinol-phosphate aminotransferase                     |
| 5220  | -2.41 | 9.30E-08 | <i>purL</i>  | phosphoribosylformylglycinamide synthase subunit PurL     |
| 6745  | -2.41 | 8.83E-08 | <i>sbcD</i>  | exonuclease sbcCD subunit D                               |
| 805   | -2.40 | 4.89E-08 | <i>cap5A</i> | capsular polysaccharide type 5 biosynthesis protein cap5A |
| 11785 | -2.40 | 1.71E-09 | -            | IucA/IucC family siderophore biosynthesis protein         |
| 2530  | -2.38 | 3.09E-10 | -            | hypothetical protein                                      |
| 5230  | -2.36 | 2.50E-07 | <i>purM</i>  | phosphoribosylformylglycinamide cyclo-ligase              |
| 975   | -2.36 | 2.14E-07 | <i>argC</i>  | N-acetyl-gamma-glutamyl-phosphate reductase               |

|       |       |          |             |                                                       |
|-------|-------|----------|-------------|-------------------------------------------------------|
| 12640 | -2.36 | 2.06E-09 | -           | sodium ABC transporter permease                       |
| 5225  | -2.33 | 1.42E-07 | <i>purF</i> | amidophosphoribosyltransferase                        |
| 13520 | -2.33 | 1.03E-09 | <i>galU</i> | UTP--glucose-1-phosphate uridylyltransferase          |
| 4795  | -2.33 | 1.90E-06 | <i>oppD</i> | ABC transporter ATP-binding protein                   |
| 14270 | -2.32 | 2.14E-09 | <i>clfB</i> | clumping factor B                                     |
| 12070 | -2.32 | 3.38E-09 | <i>rplR</i> | 50S ribosomal protein L18                             |
| 8870  | -2.30 | 2.21E-09 | <i>rpmI</i> | 50S ribosomal protein L35                             |
| 1745  | -2.29 | 5.72E-08 | -           | lipoate--protein ligase A                             |
| 4140  | -2.29 | 6.12E-09 | -           | hypothetical protein                                  |
| 13470 | -2.29 | 8.80E-08 | -           | (deoxy)nucleoside triphosphate pyrophosphohydrolase   |
| 5920  | -2.29 | 1.00E-05 | <i>pyrP</i> | uracil permease                                       |
| 2700  | -2.29 | 3.17E-09 | -           | pyridoxal 5'-phosphate synthase lyase subunit PdxS    |
| 1725  | -2.29 | 8.33E-09 | -           | LLM class flavin-dependent oxidoreductase             |
| 6755  | -2.27 | 4.62E-09 | <i>mscL</i> | large-conductance mechanosensitive channel            |
| 390   | -2.27 | 1.31E-07 | -           | NAD <sup>+</sup> synthetase                           |
| 8645  | -2.26 | 4.72E-09 | <i>aspS</i> | aspartate--tRNA ligase                                |
| 6800  | -2.26 | 2.22E-08 | -           | alanine:cation symporter family protein               |
| 7270  | -2.25 | 2.40E-06 | -           | PepSY domain-containing protein                       |
| 5450  | -2.25 | 1.72E-08 | -           | cell division protein FtsW                            |
| 3475  | -2.25 | 4.62E-09 | -           | ABC transporter permease                              |
| 11360 | -2.25 | 2.90E-08 | <i>atpE</i> | ATP synthase subunit C                                |
| 515   | -2.25 | 3.64E-08 | <i>plc</i>  | 1-phosphatidylinositol phosphodiesterase              |
| 11425 | -2.25 | 4.69E-09 | <i>rho</i>  | transcription termination factor Rho                  |
| 5260  | -2.25 | 2.98E-08 | -           | thiamine ABC transporter permease                     |
| 5110  | -2.23 | 4.88E-09 | <i>sspA</i> | serine protease                                       |
| 4315  | -2.23 | 2.38E-06 | <i>int</i>  | site-specific integrase                               |
| 5560  | -2.22 | 3.32E-06 | -           | hemin ABC transporter permease                        |
| 12340 | -2.22 | 3.80E-09 | -           | ferrichrome ABC transporter substrate-binding protein |
| 9795  | -2.20 | 8.98E-07 | -           | hypothetical protein                                  |
| 55    | -2.20 | 1.95E-07 | -           | branched-chain amino acid ABC transporter permease    |
| 2480  | -2.20 | 9.86E-10 | -           | signal peptidase II                                   |
| 1740  | -2.19 | 8.13E-09 | -           | deacetylase SIR2                                      |
| 1475  | -2.19 | 2.15E-06 | -           | DUF5079 domain-containing protein                     |
| 2375  | -2.19 | 1.62E-07 | <i>glcC</i> | LysR family transcriptional regulator                 |
| 1055  | -2.18 | 8.50E-09 | -           | ABC transporter ATP-binding protein                   |
| 9580  | -2.18 | 8.69E-08 | <i>hsdS</i> | specificity determinant HsdS                          |
| 1735  | -2.18 | 1.38E-07 | -           | hypothetical protein                                  |
| 11330 | -2.17 | 1.08E-09 | <i>atpC</i> | ATP synthase epsilon chain                            |
| 8865  | -2.17 | 1.10E-08 | <i>rplT</i> | 50S ribosomal protein L20                             |
| 3340  | -2.17 | 1.66E-09 | <i>tagA</i> | N-acetylmannosaminyltransferase                       |
| 12065 | -2.16 | 5.65E-09 | <i>rpsE</i> | 30S ribosomal protein S5                              |
| 5175  | -2.16 | 3.16E-10 | <i>qoxA</i> | quinol oxidase subunit 2                              |
| 980   | -2.16 | 1.72E-07 | <i>rocD</i> | ornithine aminotransferase 1                          |
| 8590  | -2.16 | 1.17E-09 | -           | hypothetical protein                                  |

|       |       |          |              |                                                          |
|-------|-------|----------|--------------|----------------------------------------------------------|
| 2620  | -2.15 | 1.81E-09 | -            | hypoxanthine-guanine phosphoribosyltransferase           |
| 4175  | -2.14 | 6.52E-07 | <i>empbp</i> | hypothetical protein                                     |
| 7015  | -2.14 | 1.68E-07 | -            | hydrolase                                                |
| 4335  | -2.14 | 1.49E-08 | -            | transcriptional regulator                                |
| 12965 | -2.14 | 1.08E-07 | -            | formate/nitrite transporter                              |
| 10335 | -2.13 | 1.90E-08 | <i>purB</i>  | adenylosuccinate lyase                                   |
| 4785  | -2.13 | 1.65E-08 | <i>oppB</i>  | ABC transporter permease                                 |
| 2805  | -2.13 | 1.78E-08 | <i>rplJ</i>  | 50S ribosomal protein L10                                |
| 2705  | -2.13 | 5.97E-09 | -            | pyridoxal 5'-phosphate synthase glutaminase subunit PdxT |
| 610   | -2.13 | 9.06E-07 | -            | siderophore biosynthesis protein SbnA                    |
| 6900  | -2.13 | 2.78E-08 | -            | hydrolase                                                |
| 5040  | -2.12 | 2.86E-07 | -            | hypothetical protein                                     |
| 4790  | -2.11 | 6.28E-07 | <i>oppC</i>  | ABC transporter permease                                 |
| 5770  | -2.11 | 7.07E-08 | -            | hypothetical protein                                     |
| 5235  | -2.11 | 2.60E-06 | <i>purN</i>  | phosphoribosylglycinamide formyltransferase              |
| 6385  | -2.11 | 6.75E-09 | -            | metallophosphoesterase                                   |
| 14390 | -2.11 | 3.04E-07 | -            | accessory Sec system protein translocase subunit SecY2   |
| 6245  | -2.10 | 2.29E-09 | <i>uppS</i>  | isoprenyl transferase                                    |
| 4800  | -2.10 | 3.52E-08 | <i>oppF</i>  | peptide ABC transporter ATP-binding protein              |
| 9530  | -2.09 | 7.52E-07 | -            | hypothetical protein                                     |
| 1375  | -2.09 | 1.58E-09 | -            | GntR family transcriptional regulator                    |
| 9145  | -2.09 | 3.19E-09 | <i>tyrS</i>  | tyrosine--tRNA ligase                                    |
| 11780 | -2.09 | 7.43E-08 | -            | MFS transporter                                          |
| 2335  | -2.08 | 4.35E-08 | -            | ABC transporter permease                                 |
| 12205 | -2.07 | 3.23E-07 | -            | hypothetical protein                                     |
| 6340  | -2.07 | 1.85E-09 | -            | peptidase M16                                            |
| 9515  | -2.06 | 1.21E-09 | -            | DUF4352 domain-containing protein                        |
| 2890  | -2.06 | 2.49E-08 | -            | deoxynucleoside kinase                                   |
| 12060 | -2.06 | 1.38E-08 | <i>rpmD</i>  | 50S ribosomal protein L30                                |
| 11365 | -2.06 | 3.65E-09 | <i>atpB</i>  | ATP synthase subunit A                                   |
| 11480 | -2.05 | 2.52E-08 | -            | DUF2750 domain-containing protein                        |
| 7080  | -2.05 | 7.89E-07 | -            | nitric oxide reductase activation protein NorD           |
| 5140  | -2.05 | 4.28E-07 | -            | GNAT family N-acetyltransferase                          |
| 12330 | -2.03 | 1.68E-07 | -            | biotin transporter BioY                                  |
| 7085  | -2.03 | 2.94E-07 | -            | hypothetical protein                                     |
| 10370 | -2.02 | 1.94E-08 | -            | nitric oxide synthase oxygenase                          |
| 2000  | -2.01 | 1.08E-07 | -            | histidine phosphatase family protein                     |
| 2905  | -2.01 | 4.55E-08 | -            | HAD family phosphatase                                   |
| 13690 | -2.01 | 5.21E-06 | -            | hypothetical protein                                     |
| 60    | -2.01 | 2.04E-07 | -            | membrane protein                                         |
| 4680  | -2.00 | 3.71E-08 | <i>spsA</i>  | inactive signal peptidase IA                             |
| 4135  | -2.00 | 5.37E-09 | -            | hypothetical protein                                     |
| 10820 | -2.00 | 2.44E-07 | -            | hypothetical protein                                     |
| 6025  | -2.00 | 5.96E-09 | <i>pknB</i>  | serine/threonine protein kinase                          |

|       |       |          |             |                                                                           |
|-------|-------|----------|-------------|---------------------------------------------------------------------------|
| 1075  | -2.00 | 5.57E-09 | <i>ggt</i>  | gamma-glutamyltransferase                                                 |
| 8420  | -1.99 | 1.04E-08 | <i>lepA</i> | elongation factor 4                                                       |
| 12610 | -1.99 | 3.23E-07 | -           | lysostaphin resistance protein A                                          |
| 7390  | -1.99 | 1.18E-07 | <i>aroB</i> | 3-dehydroquinate synthase                                                 |
| 14655 | -1.98 | 1.14E-07 | -           | cold-shock protein                                                        |
| 12565 | -1.98 | 1.30E-08 | -           | sodium:proton antiporter                                                  |
| 2485  | -1.98 | 6.46E-09 | -           | initiation-control protein YabA                                           |
| 1135  | -1.97 | 1.09E-07 | <i>uhpT</i> | hexose phosphate transporter                                              |
| 6640  | -1.97 | 1.29E-06 | -           | aspartate kinase                                                          |
| 4805  | -1.95 | 3.73E-08 | <i>oppA</i> | peptide ABC transporter substrate-binding protein                         |
| 12595 | -1.94 | 1.31E-08 | -           | LysR family transcriptional regulator                                     |
| 8425  | -1.94 | 1.97E-08 | <i>rpsT</i> | 30S ribosomal protein S20                                                 |
| 12465 | -1.94 | 2.85E-07 | -           | hypothetical protein                                                      |
| 14340 | -1.94 | 1.70E-09 | -           | phage infection protein                                                   |
| 4950  | -1.93 | 5.21E-08 | <i>prfC</i> | peptide chain release factor 3                                            |
| 5170  | -1.93 | 1.28E-09 | <i>qoxB</i> | cytochrome ubiquinol oxidase subunit I                                    |
| 8480  | -1.93 | 1.49E-08 | -           | ribosome biogenesis GTPase YqeH                                           |
| 3470  | -1.93 | 3.34E-08 | -           | ABC transporter ATP-binding protein                                       |
| 4520  | -1.92 | 5.87E-10 | <i>dltB</i> | D-alanyl-lipoteichoic acid biosynthesis protein DltB                      |
| 7285  | -1.92 | 1.04E-07 | -           | RNA methyltransferase                                                     |
| 3605  | -1.92 | 1.47E-07 | -           | MarR family transcriptional regulator                                     |
| 6985  | -1.91 | 4.19E-08 | -           | ABC transporter ATP-binding protein                                       |
| 7935  | -1.91 | 8.18E-08 | -           | ribonuclease Z                                                            |
| 9315  | -1.90 | 2.55E-08 | -           | TIGR01212 family radical SAM protein                                      |
| 1480  | -1.88 | 6.57E-07 | -           | DUF5080 domain-containing protein                                         |
| 9430  | -1.88 | 1.49E-07 | -           | hypothetical protein                                                      |
| 13345 | -1.87 | 3.09E-08 | -           | peptide ABC transporter permease                                          |
| 1430  | -1.86 | 1.39E-07 | -           | hypothetical protein                                                      |
| 1145  | -1.86 | 4.69E-08 | -           | sensor histidine kinase                                                   |
| 365   | -1.86 | 2.09E-07 | -           | methyltransferase                                                         |
| 4530  | -1.85 | 7.57E-10 | <i>dltD</i> | D-alanyl-lipoteichoic acid biosynthesis protein DltD                      |
| 970   | -1.85 | 2.62E-07 | <i>argJ</i> | bifunctional glutamate N-acetyltransferase/amino-acid N-acetyltransferase |
| 9290  | -1.84 | 8.89E-08 | -           | aminoacetone oxidase family FAD-binding enzyme                            |
| 4770  | -1.84 | 4.08E-09 | <i>fabH</i> | 3-oxoacyl-ACP synthase III                                                |
| 5975  | -1.83 | 9.93E-08 | <i>rpoZ</i> | DNA-directed RNA polymerase subunit omega                                 |
| 8670  | -1.83 | 6.09E-08 | <i>apt</i>  | adenine phosphoribosyltransferase                                         |
| 4940  | -1.83 | 9.85E-09 | <i>murE</i> | UDP-N-acetylmuramoyl-L-alanyl-D-glutamate--L- lysine ligase               |
| 13770 | -1.82 | 1.72E-06 | -           | CHAP domain-containing protein                                            |
| 13025 | -1.82 | 1.95E-09 | -           | amino acid ABC transporter substrate-binding protein                      |
| 5925  | -1.81 | 8.21E-06 | <i>pyrB</i> | aspartate carbamoyltransferase                                            |
| 4965  | -1.81 | 2.00E-08 | -           | Ktr system potassium uptake protein D                                     |
| 4525  | -1.81 | 3.91E-09 | <i>dltC</i> | D-alanine--poly(phosphoribitol) ligase subunit 2                          |
| 2985  | -1.81 | 1.83E-06 | -           | long-chain-fatty-acid--CoA ligase                                         |

|       |       |          |             |                                                                              |
|-------|-------|----------|-------------|------------------------------------------------------------------------------|
| 12325 | -1.81 | 3.45E-08 | -           | N-acetyltransferase                                                          |
| 13130 | -1.80 | 1.28E-05 | -           | ABC transporter ATP-binding protein                                          |
| 8765  | -1.80 | 2.25E-06 | -           | prepilin peptidase                                                           |
| 6625  | -1.80 | 5.25E-06 | <i>nuc</i>  | thermonuclease                                                               |
| 4490  | -1.80 | 3.21E-08 | -           | DUF86 domain-containing protein                                              |
| 2260  | -1.79 | 8.98E-09 | -           | hypothetical protein                                                         |
| 7150  | -1.79 | 1.89E-09 | <i>ctpA</i> | serine protease                                                              |
| 10830 | -1.79 | 7.44E-08 | -           | toxin MazF                                                                   |
| 9860  | -1.78 | 1.08E-07 | -           | hypothetical protein                                                         |
| 11460 | -1.78 | 1.79E-08 | <i>rpoE</i> | DNA-directed RNA polymerase subunit delta                                    |
| 3550  | -1.77 | 2.15E-06 | -           | hypothetical protein                                                         |
| 8815  | -1.77 | 2.51E-08 | <i>hemC</i> | hydroxymethylbilane synthase                                                 |
| 2800  | -1.76 | 3.47E-08 | <i>rplA</i> | 50S ribosomal protein L1                                                     |
| 3150  | -1.76 | 7.67E-07 | -           | DUF443 domain-containing protein                                             |
| 5835  | -1.76 | 5.32E-09 | <i>mraY</i> | phospho-N-acetylmuramoyl-pentapeptide- transferase                           |
| 3095  | -1.76 | 2.39E-09 | -           | transposase                                                                  |
| 7470  | -1.75 | 2.87E-08 | <i>ansA</i> | L-asparaginase                                                               |
| 2340  | -1.75 | 4.90E-08 | -           | ABC transporter substrate-binding protein                                    |
| 8375  | -1.75 | 2.90E-09 | -           | tRNA (N(6)-L-threonylcarbamoyladenosine(37)-C(2))-methylthiotransferase MtaB |
| 5720  | -1.75 | 5.23E-08 | -           | alpha-hemolysin                                                              |
| 4685  | -1.75 | 3.68E-08 | -           | signal peptidase IB                                                          |
| 9470  | -1.74 | 5.07E-09 | <i>pckA</i> | phosphoenolpyruvate carboxykinase (ATP)                                      |
| 3840  | -1.74 | 9.96E-08 | <i>nrdI</i> | protein NrdI                                                                 |
| 2640  | -1.74 | 1.53E-07 | <i>folP</i> | dihydropteroate synthase                                                     |
| 1730  | -1.74 | 3.00E-07 | -           | glycine cleavage system protein H                                            |
| 8475  | -1.74 | 2.37E-08 | <i>aroE</i> | shikimate dehydrogenase                                                      |
| 11135 | -1.74 | 1.95E-09 | <i>rsbU</i> | serine phosphatase                                                           |
| 3405  | -1.73 | 1.73E-08 | <i>fhuG</i> | iron ABC transporter permease                                                |
| 9740  | -1.73 | 1.55E-06 | -           | serine hydrolase family protein                                              |
| 4660  | -1.73 | 5.58E-07 | <i>argH</i> | argininosuccinate lyase                                                      |
| 4665  | -1.73 | 4.73E-07 | <i>argG</i> | argininosuccinate synthase                                                   |
| 160   | -1.73 | 1.09E-07 | -           | hypothetical protein                                                         |
| 9840  | -1.73 | 9.30E-08 | -           | DNA-binding response regulator                                               |
| 10430 | -1.72 | 2.38E-07 | -           | choloylglycine hydrolase                                                     |
| 10955 | -1.72 | 1.93E-07 | -           | hypothetical protein                                                         |
| 6820  | -1.72 | 2.25E-08 | <i>fntC</i> | phosphatidylglycerol lysyltransferase                                        |
| 12200 | -1.72 | 3.56E-06 | -           | hypothetical protein                                                         |
| 6830  | -1.72 | 8.50E-09 | <i>msrR</i> | regulatory protein MsrR                                                      |
| 2900  | -1.71 | 6.19E-07 | -           | tRNA-specific adenosine deaminase                                            |
| 6020  | -1.71 | 4.76E-08 | -           | protein phosphatase                                                          |
| 13325 | -1.70 | 2.98E-07 | -           | MFS transporter                                                              |
| 10345 | -1.70 | 1.57E-07 | -           | staphostatin A                                                               |
| 9845  | -1.69 | 7.17E-08 | -           | sensor histidine kinase                                                      |
| 385   | -1.69 | 2.02E-07 | -           | ABC transporter ATP-binding protein                                          |

|       |       |          |             |                                                                                                             |
|-------|-------|----------|-------------|-------------------------------------------------------------------------------------------------------------|
| 3845  | -1.69 | 1.08E-07 | -           | ribonucleotide-diphosphate reductase subunit alpha                                                          |
| 10860 | -1.69 | 2.81E-06 | -           | hypothetical protein                                                                                        |
| 1250  | -1.69 | 2.12E-07 | -           | L-lactate dehydrogenase                                                                                     |
| 8285  | -1.69 | 3.83E-09 | -           | DEAD/DEAH box family ATP-dependent RNA helicase                                                             |
| 12185 | -1.68 | 1.15E-07 | <i>glcU</i> | glucose uptake protein GlcU                                                                                 |
| 10810 | -1.68 | 1.41E-07 | -           | XRE family transcriptional regulator                                                                        |
| 2345  | -1.68 | 4.08E-05 | -           | N-acetylmuramoyl-L-alanine amidase                                                                          |
| 430   | -1.68 | 1.37E-06 | -           | anion permease                                                                                              |
| 5970  | -1.67 | 1.32E-08 | <i>gmk</i>  | guanylate kinase                                                                                            |
| 10420 | -1.67 | 5.98E-06 | -           | YolD-like family protein                                                                                    |
| 5240  | -1.66 | 9.17E-07 | <i>purH</i> | bifunctional phosphoribosylaminoimidazolecarboxamide formyltransferase/inosine monophosphate cyclohydrolase |
| 8025  | -1.66 | 8.36E-09 | -           | geranyltranstransferase                                                                                     |
| 8595  | -1.65 | 1.66E-07 | -           | hypothetical protein                                                                                        |
| 8680  | -1.65 | 2.69E-07 | <i>secF</i> | protein translocase subunit SecDF                                                                           |
| 5940  | -1.65 | 4.59E-08 | <i>carB</i> | carbamoyl-phosphate synthase large chain                                                                    |
| 10385 | -1.64 | 5.37E-09 | -           | sodium-dependent dicarboxylate transporter SdcS                                                             |
| 5690  | -1.64 | 1.02E-07 | <i>efb</i>  | fibrinogen-binding protein                                                                                  |
| 1620  | -1.64 | 7.97E-09 | -           | membrane protein                                                                                            |
| 2510  | -1.64 | 2.12E-09 | <i>metS</i> | methionine--tRNA ligase                                                                                     |
| 11250 | -1.64 | 1.53E-07 | -           | phosphohydrolase                                                                                            |
| 7035  | -1.62 | 3.09E-09 | -           | cold-shock protein CspA                                                                                     |
| 8280  | -1.62 | 3.46E-08 | -           | endonuclease                                                                                                |
| 12410 | -1.62 | 9.26E-08 | -           | AraC family transcriptional regulator                                                                       |
| 1555  | -1.62 | 2.76E-05 | -           | DUF5080 domain-containing protein                                                                           |
| 1150  | -1.62 | 8.19E-08 | -           | lipoprotein                                                                                                 |
| 8490  | -1.62 | 1.78E-07 | <i>mtnN</i> | 5'-methylthioadenosine/S-adenosylhomocysteine nucleosidase                                                  |
| 1005  | -1.61 | 3.71E-08 | <i>ptsG</i> | PTS glucose EIICBA component                                                                                |
| 5695  | -1.61 | 2.88E-07 | -           | fibrinogen-binding protein                                                                                  |
| 2585  | -1.60 | 3.74E-08 | <i>mfd</i>  | transcription-repair coupling factor                                                                        |
| 4675  | -1.60 | 2.24E-07 | -           | TVP38/TMEM64 family protein                                                                                 |
| 5930  | -1.60 | 2.42E-07 | <i>pyrC</i> | dihydroorotase                                                                                              |
| 8485  | -1.60 | 1.47E-07 | -           | hypothetical protein                                                                                        |
| 13380 | -1.60 | 3.06E-07 | -           | transporter                                                                                                 |
| 13160 | -1.59 | 1.15E-07 | -           | Bcr/CflA family drug resistance efflux transporter                                                          |
| 14385 | -1.59 | 1.15E-05 | -           | accessory Sec system protein Asp1                                                                           |
| 10825 | -1.58 | 2.76E-06 | -           | hypothetical protein                                                                                        |
| 11180 | -1.58 | 9.24E-08 | <i>kdpC</i> | potassium-transporting ATPase subunit C                                                                     |
| 11185 | -1.56 | 2.74E-07 | <i>kdpB</i> | potassium-transporting ATPase subunit B                                                                     |
| 1095  | -1.56 | 8.33E-07 | -           | sugar ABC transporter ATP-binding protein                                                                   |
| 6345  | -1.56 | 4.55E-08 | -           | 3-oxoacyl-ACP reductase                                                                                     |
| 12855 | -1.56 | 6.27E-09 | -           | transcriptional regulator                                                                                   |
| 7280  | -1.55 | 6.15E-07 | -           | DUF4889 domain-containing protein                                                                           |
| 4910  | -1.55 | 2.73E-09 | -           | AI-2E family transporter                                                                                    |

|       |       |          |             |                                                        |
|-------|-------|----------|-------------|--------------------------------------------------------|
| 665   | -1.55 | 1.07E-07 | -           | MFS transporter                                        |
| 1550  | -1.55 | 4.66E-06 | -           | DUF5079 domain-containing protein                      |
| 5165  | -1.54 | 1.27E-08 | <i>qoxC</i> | quinol oxidase subunit 3                               |
| 7865  | -1.54 | 2.51E-08 | -           | hypothetical protein                                   |
| 11190 | -1.54 | 2.73E-07 | <i>kdpA</i> | potassium-transporting ATPase A chain                  |
| 510   | -1.53 | 1.62E-07 | -           | hypothetical protein                                   |
| 11455 | -1.53 | 3.00E-06 | <i>pyrG</i> | CTP synthetase                                         |
| 6135  | -1.53 | 2.89E-09 | <i>rplS</i> | 50S ribosomal protein L19                              |
| 4835  | -1.52 | 1.36E-08 | <i>trpS</i> | tryptophan--tRNA ligase                                |
| 12975 | -1.52 | 2.40E-07 | -           | glutathione S-transferase                              |
| 9115  | -1.51 | 4.73E-07 | <i>serA</i> | D-3-phosphoglycerate dehydrogenase                     |
| 9665  | -1.51 | 3.18E-07 | <i>epiB</i> | hypothetical protein                                   |
| 11720 | -1.51 | 8.47E-08 | -           | MFS transporter                                        |
| 2795  | -1.50 | 1.25E-08 | <i>rplK</i> | 50S ribosomal protein L11                              |
| 12230 | -1.50 | 2.16E-05 | -           | MarR family transcriptional regulator                  |
| 14535 | -1.49 | 4.70E-07 | -           | N-acetyltransferase                                    |
| 2910  | -1.49 | 7.54E-07 | -           | FMN-dependent NADPH-azoreductase                       |
| 3000  | -1.49 | 1.36E-05 | -           | hypothetical protein                                   |
| 7870  | -1.49 | 3.18E-08 | <i>srrB</i> | two-component sensor histidine kinase                  |
| 8730  | -1.49 | 3.88E-08 | <i>rplU</i> | 50S ribosomal protein L21                              |
| 5005  | -1.48 | 7.23E-06 | -           | hypothetical protein                                   |
| 890   | -1.48 | 7.37E-06 | -           | DUF454 domain-containing protein                       |
| 8655  | -1.47 | 5.49E-07 | <i>lytH</i> | cell wall amidase                                      |
| 12290 | -1.47 | 4.27E-08 | <i>moaC</i> | cyclic pyranopterin monophosphate synthase MoaC        |
| 7395  | -1.47 | 1.82E-07 | <i>aroC</i> | chorismate synthase                                    |
| 4280  | -1.47 | 8.42E-08 | -           | hypothetical protein                                   |
| 5000  | -1.46 | 8.06E-06 | -           | DUF2187 domain-containing protein                      |
| 5105  | -1.46 | 1.86E-07 | <i>sspB</i> | staphopain B                                           |
| 5255  | -1.46 | 1.61E-08 | -           | ABC transporter ATP-binding protein                    |
| 1820  | -1.45 | 1.45E-06 | -           | RimJ/RimL family protein N-acetyltransferase           |
| 12335 | -1.45 | 8.53E-07 | -           | purine nucleosidase                                    |
| 13320 | -1.45 | 3.69E-07 | -           | hypothetical protein                                   |
| 11450 | -1.45 | 7.83E-08 | -           | hypothetical protein                                   |
| 2005  | -1.45 | 1.03E-07 | -           | hypothetical protein                                   |
| 7370  | -1.45 | 9.18E-07 | -           | membrane protein                                       |
| 6940  | -1.44 | 1.49E-08 | <i>pepF</i> | oligoendopeptidase F                                   |
| 90    | -1.44 | 1.42E-03 | <i>purA</i> | adenylosuccinate synthetase                            |
| 11565 | -1.44 | 6.77E-09 | -           | lytic regulatory protein                               |
| 3640  | -1.44 | 1.51E-05 | -           | hypothetical protein                                   |
| 2820  | -1.43 | 9.67E-08 | -           | DNA-directed RNA polymerase subunit beta               |
| 8465  | -1.43 | 5.08E-08 | <i>nadD</i> | nicotinate-nicotinamide nucleotide adenylyltransferase |
| 2645  | -1.42 | 1.05E-07 | <i>folB</i> | dihydroneopterin aldolase                              |
| 2520  | -1.42 | 1.31E-07 | -           | ribonuclease M5                                        |
| 10850 | -1.42 | 3.93E-07 | -           | succinyl-diaminopimelate desuccinylase                 |



|       |       |          |               |                                                                            |
|-------|-------|----------|---------------|----------------------------------------------------------------------------|
| 5830  | -1.42 | 8.39E-09 | <i>pbpA</i>   | penicillin-binding protein                                                 |
| 505   | -1.41 | 1.14E-08 | -             | ATPase                                                                     |
| 370   | -1.41 | 1.16E-07 | -             | nickel ABC transporter substrate-binding protein                           |
| 1850  | -1.41 | 1.62E-05 | -             | hypothetical protein                                                       |
| 3925  | -1.40 | 2.13E-06 | -             | membrane protein                                                           |
| 11195 | -1.40 | 4.56E-05 | -             | potassium-transporting ATPase subunit F                                    |
| 380   | -1.40 | 6.47E-06 | <i>opp-3C</i> | ABC transporter permease                                                   |
| 3830  | -1.40 | 2.23E-07 | <i>folE</i>   | NADPH-dependent 7-cyano-7-deazaguanine reductase QueF                      |
| 2325  | -1.39 | 1.06E-06 | <i>metB</i>   | cystathionine gamma-synthase                                               |
| 13565 | -1.39 | 6.12E-09 | -             | GTP pyrophosphokinase                                                      |
| 755   | -1.39 | 2.32E-05 | <i>phnC</i>   | phosphonates import ATP-binding protein PhnC                               |
| 2810  | -1.39 | 2.44E-06 | <i>rplL</i>   | 50S ribosomal protein L7/L12                                               |
| 6235  | -1.39 | 5.74E-08 | <i>pyrH</i>   | UMP kinase                                                                 |
| 12700 | -1.38 | 9.93E-06 | -             | HlyD family secretion protein                                              |
| 14530 | -1.37 | 4.77E-06 | -             | polysaccharide deacetylase                                                 |
| 1605  | -1.37 | 2.08E-05 | -             | TIGR01741 family protein                                                   |
| 1455  | -1.37 | 2.24E-06 | -             | ABC transporter ATP-binding protein                                        |
| 9270  | -1.37 | 5.96E-09 | -             | dipeptidase PepV                                                           |
| 11280 | -1.37 | 2.33E-05 | <i>thiD</i>   | bifunctional hydroxymethylpyrimidine kinase/phosphomethylpyrimidine kinase |
| 11285 | -1.36 | 1.69E-05 | -             | thiaminase II                                                              |
| 13830 | -1.36 | 8.47E-08 | -             | TetR/AcrR family transcriptional regulator                                 |
| 11275 | -1.36 | 1.73E-05 | <i>thiM</i>   | hydroxyethylthiazole kinase                                                |
| 9260  | -1.35 | 1.08E-07 | -             | phosphotransferase                                                         |
| 5245  | -1.35 | 2.32E-06 | <i>purD</i>   | phosphoribosylamine--glycine ligase                                        |
| 14130 | -1.35 | 5.38E-06 | <i>betA</i>   | oxygen-dependent choline dehydrogenase                                     |
| 3645  | -1.35 | 2.15E-06 | -             | hypothetical protein                                                       |
| 9265  | -1.35 | 1.17E-08 | <i>dat</i>    | D-alanine aminotransferase                                                 |
| 5585  | -1.35 | 2.41E-07 | <i>pheS</i>   | phenylalanine--tRNA ligase subunit alpha                                   |
| 9900  | -1.34 | 7.28E-07 | -             | PTS transporter subunit IIC                                                |
| 4565  | -1.34 | 1.18E-08 | <i>ampA</i>   | cytosol aminopeptidase                                                     |
| 12405 | -1.34 | 7.83E-06 | -             | transcriptional regulator                                                  |
| 2650  | -1.33 | 3.15E-08 | <i>folK</i>   | 2-amino-4-hydroxy-6- hydroxymethyl dihydropteridine diphosphokinase        |
| 13060 | -1.33 | 2.27E-07 | <i>sbi</i>    | immunoglobulin-binding protein sbi                                         |
| 1825  | -1.33 | 3.37E-04 | -             | EfeM/EfeO family lipoprotein                                               |
| 6315  | -1.33 | 2.41E-07 | <i>pnpA</i>   | polyribonucleotide nucleotidyltransferase                                  |
| 7385  | -1.32 | 3.56E-08 | <i>aroA</i>   | 3-phosphoshikimate 1-carboxyvinyltransferase                               |
| 11245 | -1.31 | 5.68E-07 | -             | cardiolipin synthase                                                       |
| 2835  | -1.31 | 1.00E-06 | <i>rpsL</i>   | 30S ribosomal protein S12                                                  |
| 12180 | -1.31 | 1.12E-07 | -             | N-acetyltransferase                                                        |
| 14320 | -1.30 | 6.05E-06 | -             | hypothetical protein                                                       |
| 800   | -1.30 | 2.26E-06 | <i>adhE</i>   | bifunctional acetaldehyde-CoA/alcohol dehydrogenase                        |
| 13605 | -1.30 | 6.79E-06 | -             | lantibiotic ABC transporter ATP-binding protein                            |
| 5430  | -1.30 | 2.42E-07 | <i>typA</i>   | translational GTPase TypA                                                  |

|       |       |          |               |                                                                           |
|-------|-------|----------|---------------|---------------------------------------------------------------------------|
| 4735  | -1.30 | 4.08E-06 | -             | LysR family transcriptional regulator                                     |
| 2885  | -1.29 | 4.67E-07 | -             | HAD family hydrolase                                                      |
| 10440 | -1.29 | 4.33E-06 | -             | hypothetical protein                                                      |
| 13125 | -1.29 | 2.63E-05 | -             | ABC transporter ATP-binding protein                                       |
| 6125  | -1.29 | 1.38E-05 | <i>rimM</i>   | ribosome maturation factor RimM                                           |
| 5825  | -1.28 | 2.25E-08 | <i>ftsL</i>   | cell division protein FtsL                                                |
| 2830  | -1.28 | 1.30E-06 | -             | 50S ribosomal protein L7ae-like protein                                   |
| 6785  | -1.28 | 2.46E-06 | -             | DNA topoisomerase IV subunit B                                            |
| 7525  | -1.27 | 7.04E-05 | -             | hypothetical protein                                                      |
| 7855  | -1.26 | 2.39E-05 | -             | site-specific integrase                                                   |
| 13485 | -1.25 | 4.73E-07 | -             | hypothetical protein                                                      |
| 4495  | -1.25 | 5.99E-07 | -             | TIGR01457 family HAD-type hydrolase                                       |
| 2255  | -1.25 | 2.17E-07 | -             | hypothetical protein                                                      |
| 6130  | -1.24 | 1.17E-05 | <i>trmD</i>   | tRNA (guanosine(37)-N1)-methyltransferase TrmD                            |
| 2750  | -1.24 | 5.30E-08 | <i>gltX</i>   | glutamate--tRNA ligase                                                    |
| 1705  | -1.23 | 2.50E-07 | -             | lipase                                                                    |
| 13435 | -1.23 | 3.02E-05 | -             | hypothetical protein                                                      |
| 6790  | -1.23 | 2.23E-07 | <i>parC</i>   | DNA topoisomerase 4 subunit A                                             |
| 2590  | -1.22 | 1.61E-07 | -             | stage V sporulation protein B                                             |
| 8030  | -1.22 | 8.29E-07 | <i>xseB</i>   | exodeoxyribonuclease 7 small subunit                                      |
| 12880 | -1.21 | 3.64E-08 | -             | transcriptional regulator                                                 |
| 12235 | -1.21 | 2.39E-05 | -             | MFS transporter                                                           |
| 4755  | -1.21 | 5.55E-05 | -             | phosphatidylethanolamine-binding protein                                  |
| 5120  | -1.21 | 1.00E-05 | -             | acyltransferase                                                           |
| 8810  | -1.21 | 2.68E-06 | <i>hemD</i>   | uroporphyrinogen III methyltransferase                                    |
| 3750  | -1.21 | 1.01E-06 | -             | para-aminobenzoate synthetase subunit I                                   |
| 12455 | -1.20 | 2.32E-07 | -             | hypothetical protein                                                      |
| 8995  | -1.20 | 2.85E-08 | -             | NAD-dependent malic enzyme 4                                              |
| 12055 | -1.20 | 5.44E-07 | <i>rplO</i>   | 50S ribosomal protein L15                                                 |
| 3655  | -1.20 | 3.96E-07 | -             | hypothetical protein                                                      |
| 9895  | -1.20 | 1.61E-04 | <i>(glnH)</i> | ABC transporter permease                                                  |
| 1540  | -1.20 | 4.87E-08 | -             | hypothetical protein                                                      |
| 12540 | -1.19 | 2.93E-06 | -             | sodium transporter                                                        |
| 1385  | -1.19 | 1.38E-06 | <i>bglA</i>   | 6-phospho-beta-glucosidase                                                |
| 10635 | -1.19 | 2.54E-05 | -             | phage major capsid protein                                                |
| 2970  | -1.19 | 2.35E-05 | -             | HAD family hydrolase                                                      |
| 2535  | -1.19 | 3.53E-07 | <i>ispE</i>   | 4-diphosphocytidyl-2C-methyl-D-erythritol kinase                          |
| 5935  | -1.18 | 3.82E-06 | <i>carA</i>   | carbamoyl-phosphate synthase small chain                                  |
| 9405  | -1.18 | 2.62E-04 | -             | RNA polymerase sigma factor SigS                                          |
| 965   | -1.18 | 1.74E-05 | <i>argB</i>   | acetylglutamate kinase                                                    |
| 375   | -1.17 | 3.63E-06 | <i>opp-3B</i> | ABC transporter permease                                                  |
| 9775  | -1.17 | 6.42E-08 | -             | multidrug ABC transporter ATP-binding protein                             |
| 12515 | -1.16 | 5.16E-06 | -             | alanine glycine permease                                                  |
| 760   | -1.16 | 2.04E-04 | -             | phosphate/phosphite/phosphonate ABC transporter substrate-binding protein |

|       |       |          |             |                                                         |
|-------|-------|----------|-------------|---------------------------------------------------------|
| 5100  | -1.16 | 1.37E-05 | <i>sspC</i> | staphostatin B                                          |
| 2575  | -1.16 | 1.67E-07 | -           | 50S ribosomal protein L25/general stress protein Ctc    |
| 2655  | -1.15 | 8.24E-07 | -           | hypothetical protein                                    |
| 9255  | -1.15 | 8.47E-08 | <i>trmB</i> | tRNA (guanosine(46)-N7)-methyltransferase TrmB          |
| 50    | -1.15 | 1.49E-07 | <i>serS</i> | serine--tRNA ligase                                     |
| 3835  | -1.15 | 2.02E-06 | -           | EamA/RhaT family transporter                            |
| 8725  | -1.15 | 2.48E-07 | -           | hypothetical protein                                    |
| 11990 | -1.15 | 5.49E-07 | <i>rplM</i> | 50S ribosomal protein L13                               |
| 10115 | -1.14 | 6.49E-06 | -           | membrane protein                                        |
| 9150  | -1.14 | 2.50E-07 | <i>sgtA</i> | transglycosylase                                        |
| 9535  | -1.13 | 3.90E-05 | -           | hypothetical protein                                    |
| 6570  | -1.13 | 7.63E-06 | -           | hypothetical protein                                    |
| 3590  | -1.12 | 3.44E-07 | -           | undecaprenyl-diphosphatase                              |
| 6430  | -1.12 | 5.41E-06 | <i>glpP</i> | glycerol-3-phosphate responsive antiterminator          |
| 1560  | -1.11 | 2.08E-05 | -           | hypothetical protein                                    |
| 3745  | -1.11 | 1.22E-05 | <i>pabA</i> | aminodeoxychorismate/anthranilate synthase component II |
| 2460  | -1.11 | 2.01E-06 | <i>tmk</i>  | thymidylate kinase                                      |
| 6425  | -1.11 | 6.98E-07 | <i>mutL</i> | DNA mismatch repair protein MutL                        |
| 8250  | -1.10 | 3.95E-07 | <i>rpmG</i> | 50S ribosomal protein L33                               |
| 13815 | -1.10 | 4.39E-04 | <i>feoB</i> | ferrous iron transporter B                              |
| 2845  | -1.10 | 4.85E-07 | <i>fusA</i> | elongation factor G                                     |
| 11175 | -1.09 | 1.25E-06 | -           | hypothetical protein                                    |
| 14325 | -1.09 | 1.02E-06 | -           | PTS mannose transporter subunit IIA                     |
| 10435 | -1.09 | 5.52E-08 | -           | hypothetical protein                                    |
| 4620  | -1.08 | 9.82E-06 | -           | kinase                                                  |
| 3615  | -1.08 | 1.24E-07 | -           | aldo/keto reductase                                     |
| 6750  | -1.08 | 1.18E-07 | <i>sbcC</i> | nuclease SbcCD subunit C                                |
| 12435 | -1.07 | 1.29E-06 | -           | membrane protein                                        |
| 13000 | -1.07 | 2.63E-06 | -           | protein disulfide-isomerase                             |
| 3755  | -1.07 | 1.32E-05 | -           | aminodeoxychorismate lyase                              |
| 6400  | -1.07 | 7.37E-06 | -           | hypothetical protein                                    |
| 12830 | -1.07 | 2.50E-06 | -           | phage infection protein                                 |
| 5590  | -1.06 | 2.01E-07 | <i>pheT</i> | phenylalanine--tRNA ligase subunit beta                 |
| 2085  | -1.06 | 1.26E-04 | -           | MazF/PemK family toxin                                  |
| 11170 | -1.06 | 4.70E-07 | -           | hypothetical protein                                    |
| 7375  | -1.06 | 5.33E-06 | -           | hypothetical protein                                    |
| 5160  | -1.06 | 1.26E-07 | <i>qoxD</i> | quinol oxidase subunit 4                                |
| 5500  | -1.05 | 1.40E-04 | -           | hypothetical protein                                    |
| 14025 | -1.05 | 2.66E-06 | -           | hypothetical protein                                    |
| 8470  | -1.04 | 2.77E-06 | -           | RNA-binding protein                                     |
| 2515  | -1.04 | 1.45E-07 | -           | TatD family deoxyribonuclease                           |
| 14155 | -1.04 | 3.60E-05 | <i>bccT</i> | choline transporter BetT                                |
| 7315  | -1.03 | 5.44E-07 | <i>pbp2</i> | penicillin-binding protein 2                            |
| 11160 | -1.03 | 3.06E-06 | <i>acpS</i> | holo-ACP synthase                                       |

|       |       |          |            |                                                               |
|-------|-------|----------|------------|---------------------------------------------------------------|
| 1140  | -1.03 | 1.58E-05 | -          | DNA-binding response regulator                                |
| 1915  | -1.03 | 1.25E-05 | -          | chromosome partitioning protein ParB                          |
| 6005  | -1.03 | 6.94E-07 | <i>fnt</i> | methionyl-tRNA formyltransferase                              |
| 500   | -1.03 | 2.70E-05 | -          | hypothetical protein                                          |
| 3690  | -1.02 | 6.12E-06 | -          | HlyC/CorC family transporter                                  |
| 3770  | -1.02 | 1.78E-06 | -          | allophanate hydrolase                                         |
| 2490  | -1.02 | 3.23E-04 | -          | tRNA1(Val) (adenine(37)-N6)-methyltransferase                 |
| 14540 | -1.02 | 1.23E-05 | -          | energy-coupling factor transporter transmembrane protein EcfT |
| 13440 | -1.01 | 7.41E-05 | -          | hypothetical protein                                          |
| 9380  | -1.01 | 9.06E-05 | -          | transcriptional regulator                                     |
| 3210  | -1.01 | 9.80E-04 | -          | endonuclease III domain-containing protein                    |
| 7215  | -1.01 | 2.69E-04 | -          | membrane protein                                              |

29 \*Locus\_tag: identifier corresponding to reference genome sequence, prefix to all  
30 numbers listed is “SAUSA300\_RS”, \*\*logFC: log<sub>2</sub> fold change, \*\*\*FDR: false  
31 discovery rate.

32

33

34 **Supplementary Table 2e.** VRE RBWH1 up-regulated genes following 1 h treatment  
35 with 1.75 μM PBT2 and 128 μM zinc in CAMHB grown at 37°C.

| Locus_tag* | LogFC** | FDR***   | Gene         | Putative gene product function                                                                                          |
|------------|---------|----------|--------------|-------------------------------------------------------------------------------------------------------------------------|
| 1891       | 7.20    | 3.48E-10 | <i>copZ3</i> | copper chaperone CopZ,Activator of copYZAB                                                                              |
| 1892       | 7.07    | 3.48E-10 | <i>copY</i>  | CopY/TcrY family copper transport repressor                                                                             |
| 1785       | 6.89    | 6.08E-11 | <i>budB</i>  | Acetolactate synthase                                                                                                   |
| 1269       | 6.74    | 1.02E-11 | <i>zosA</i>  | metal transporter                                                                                                       |
| 1896       | 6.50    | 8.19E-12 | <i>cadA3</i> | zinc/cadmium/mercury/lead-transporting ATPase                                                                           |
| 1890       | 6.19    | 2.67E-11 | <i>copA</i>  | copper transporter                                                                                                      |
| 1784       | 5.74    | 2.67E-11 | <i>aldC</i>  | Alpha-acetolactate decarboxylase                                                                                        |
| 987        | 5.51    | 4.58E-11 | <i>ziaA</i>  | cadmium ATPase                                                                                                          |
| 49         | 5.14    | 1.15E-07 | <i>tcpE</i>  | conjugative transposon membrane protein,TcpE family                                                                     |
| 725        | 4.84    | 9.93E-10 | <i>glnR</i>  | MerR family transcriptional regulator,HTH-type transcriptional regulator glnR,zinc-responsive transcriptional regulator |
| 354        | 4.79    | 5.49E-11 | -            | zinc-containing alcohol dehydrogenase                                                                                   |
| 1889       | 4.55    | 3.10E-11 | <i>copB</i>  | copper-translocating P-type ATPase                                                                                      |
| 1553       | 4.43    | 1.87E-04 | -            | LPXTG-motif protein cell wall anchor domain protein                                                                     |
| 616        | 4.42    | 4.72E-08 | <i>vanXI</i> | D-alanyl-D-alanine dipeptidase                                                                                          |
| 2100       | 4.23    | 7.27E-08 | -            | Sulfite exporter TauE/SafE                                                                                              |
| 726        | 4.22    | 3.70E-10 | <i>glnA</i>  | glutamine synthetase, type I                                                                                            |
| 615        | 4.20    | 1.06E-06 | <i>vanBI</i> | Vancomycin B-type resistance protein VanB,D-alanine--D-lactate ligase                                                   |

|      |      |          |              |                                                                                                                                      |
|------|------|----------|--------------|--------------------------------------------------------------------------------------------------------------------------------------|
| 50   | 4.16 | 8.53E-09 | -            | ATP/GTP-binding protein, Type IV secretory pathway, VirB4 components, type-IV secretion system protein TraC, AAA-like domain         |
| 1521 | 4.12 | 1.28E-08 | <i>gspA1</i> | glycosyl transferase family protein, General stress protein A                                                                        |
| 2747 | 4.05 | 6.67E-05 | -            | transcriptional regulator, LacI family, DNA-binding transcriptional repressor MalI, ABC-type sugar transport system                  |
| 1520 | 4.05 | 9.81E-07 | -            | hypothetical protein                                                                                                                 |
| 1268 | 4.04 | 5.55E-10 | -            | integral membrane protein, Protein of unknown function (DUF441)                                                                      |
| 2759 | 3.98 | 9.63E-10 | <i>dps</i>   | Non-specific DNA-binding protein Dps, iron-binding ferritin-like antioxidant protein/ferroxidase                                     |
| 1504 | 3.96 | 1.02E-05 | <i>amt</i>   | ammonium transporter family protein                                                                                                  |
| 1522 | 3.94 | 1.34E-10 | <i>gspA2</i> | glycosyl transferase family protein, rhamnosyltransferase                                                                            |
| 1246 | 3.86 | 6.52E-08 | <i>suhB</i>  | Inositol-1-monophosphatase                                                                                                           |
| 289  | 3.84 | 5.55E-09 | <i>mobB</i>  | plasmid recombinase enzyme Pre, Plasmid recombination enzyme                                                                         |
| 614  | 3.82 | 4.84E-06 | <i>vanH1</i> | oxidoreductase, aldo/keto reductase family protein                                                                                   |
| 1642 | 3.76 | 2.52E-09 | -            | hypothetical protein                                                                                                                 |
| 1169 | 3.75 | 5.16E-10 | -            | putative lipase/esterase, Arylesterase, esterase, Predicted esterase, Alpha/beta hydrolase family                                    |
| 1245 | 3.75 | 4.83E-07 | -            | UPF0223 family protein, hypothetical protein, hypothetical protein, Uncharacterised protein family (UPF0223)                         |
| 1519 | 3.72 | 7.67E-08 | <i>corA2</i> | Mg <sup>2+</sup> cation transporter, Magnesium transport protein CorA, zinc transporter, magnesium and cobalt transport protein CorA |
| 1641 | 3.63 | 1.08E-09 | -            | hypothetical protein                                                                                                                 |
| 1168 | 3.58 | 1.13E-09 | -            | hypothetical protein                                                                                                                 |
| 1713 | 3.57 | 3.90E-06 | <i>phnW</i>  | 2-aminoethylphosphonate--pyruvate transaminase                                                                                       |
| 216  | 3.53 | 1.27E-08 | -            | plasmid stabilization system protein, addiction module toxin, Txe/YoeB family, Plasmid encoded toxin Txe                             |
| 2099 | 3.53 | 4.36E-08 | -            | GNAT family acetyltransferase, ribosomal-protein-alanine acetyltransferase                                                           |
| 1575 | 3.50 | 1.08E-09 | <i>clpB</i>  | ATP-dependent Clp protease                                                                                                           |
| 2278 | 3.48 | 2.37E-09 | <i>lmrA</i>  | Multidrug resistance ABC transporter                                                                                                 |
| 215  | 3.47 | 4.68E-09 | -            | prevent-host-death protein Phd, prevent-host-death family protein, Phd_YefM                                                          |
| 1524 | 3.46 | 9.75E-10 | -            | isochorismatase, Isochorismatase family                                                                                              |
| 355  | 3.43 | 3.48E-10 | <i>hchA</i>  | DJ-1/PfpI family protein, Molecular chaperone Hsp31 and glyoxalase 3                                                                 |
| 1715 | 3.32 | 5.60E-07 | <i>phnX2</i> | Phosphonoacetaldehyde hydrolase                                                                                                      |
| 1286 | 3.32 | 5.48E-10 | -            | hypothetical protein                                                                                                                 |
| 1523 | 3.31 | 9.75E-10 | <i>yidA3</i> | HAD superfamily hydrolase, Phosphatase YidA                                                                                          |
| 1714 | 3.29 | 1.47E-03 | <i>phnX1</i> | Phosphonoacetaldehyde hydrolase                                                                                                      |
| 1434 | 3.27 | 1.13E-09 | -            | hypothetical protein, Uncharacterized protein conserved in bacteria, conserved domain, Domain of unknown function (DUF2382)          |
| 611  | 3.26 | 2.51E-09 | <i>vanYB</i> | D-alanyl-D-alanine carboxypeptidase                                                                                                  |
| 1048 | 3.26 | 1.94E-07 | -            | hypothetical protein                                                                                                                 |
| 2279 | 3.25 | 1.16E-08 | -            | TetR family transcriptional regulator, Bacterial regulatory proteins, tetR family                                                    |
| 2614 | 3.22 | 4.65E-08 | -            | hypothetical protein                                                                                                                 |

|      |      |          |              |                                                                                                              |
|------|------|----------|--------------|--------------------------------------------------------------------------------------------------------------|
| 1672 | 3.19 | 4.29E-09 | <i>hrcA</i>  | heat-inducible transcription repressor HrcA                                                                  |
| 513  | 3.19 | 3.03E-06 | -            | peptidyl-prolyl cis-trans isomerase                                                                          |
| 1518 | 3.18 | 3.27E-09 | <i>yghA</i>  | short chain dehydrogenase/reductase family oxidoreductase                                                    |
| 507  | 3.16 | 2.33E-10 | <i>ydbD</i>  | manganese-containing catalase                                                                                |
| 689  | 3.12 | 1.08E-05 | <i>ydiB</i>  | ATPase,hypothetical protein                                                                                  |
| 1282 | 3.12 | 2.70E-07 | -            | hypothetical protein                                                                                         |
| 2277 | 3.11 | 5.50E-09 | <i>yheH2</i> | Probable multidrug resistance ABC transporter ATP-binding/permease protein YheH                              |
| 690  | 3.10 | 1.40E-05 | -            | GNAT family acetyltransferase,ribosomal-protein-alanine acetyltransferase                                    |
| 612  | 3.10 | 1.69E-09 | <i>vanW</i>  | vancomycin B-type resistance protein VanW                                                                    |
| 2973 | 3.10 | 4.81E-07 | <i>yvqK</i>  | Cob(I)alamin adenosyltransferase PduO                                                                        |
| 2011 | 3.00 | 6.02E-09 | -            | hypothetical protein                                                                                         |
| 2153 | 3.00 | 1.08E-04 | -            | hypothetical protein                                                                                         |
| 2405 | 3.00 | 7.75E-08 | -            | hypothetical protein                                                                                         |
| 737  | 2.97 | 3.72E-05 | -            | inner integral membrane protein,Protein of unknown function (DUF2512)                                        |
| 1096 | 2.97 | 1.38E-09 | -            | conserved hypothetical protein TIGR01655                                                                     |
| 1802 | 2.96 | 2.51E-09 | <i>xerC7</i> | site-specific tyrosine recombinase XerC-family                                                               |
| 2247 | 2.96 | 1.60E-09 | -            | hypothetical protein                                                                                         |
| 468  | 2.94 | 2.14E-06 | <i>yetF</i>  | membrane protein,hypothetical protein,Protein of unknown function (DUF421)                                   |
| 1280 | 2.94 | 2.37E-09 | <i>uspA</i>  | universal stress protein UspA                                                                                |
| 2762 | 2.94 | 6.24E-08 | <i>msrA</i>  | Peptide methionine sulfoxide reductase msrA,                                                                 |
| 1127 | 2.94 | 9.75E-10 | -            | hypothetical protein                                                                                         |
| 542  | 2.94 | 2.16E-09 | -            | superoxide dismutase,Uncharacterized protein conserved in bacteria,Protein of unknown function (DUF1033)     |
| 1503 | 2.93 | 5.54E-05 | <i>gadC3</i> | amino acid antiporter,Glutamate/gamma-aminobutyrate antiporter                                               |
| 2174 | 2.92 | 6.91E-10 | <i>yfkN</i>  | Ser/Thr protein phosphatase family protein                                                                   |
| 2974 | 2.91 | 8.48E-07 | -            | Additional lipoprotein component of predicted cobalamin ECF transporter                                      |
| 960  | 2.91 | 9.75E-10 | <i>pimB</i>  | glycosyltransferase,GDP-mannose-dependent alpha-(1-6)-phosphatidylinositol monomannoside mannosyltransferase |
| 2164 | 2.90 | 1.38E-09 | -            | hypothetical protein                                                                                         |
| 2972 | 2.90 | 2.42E-08 | <i>nrdE</i>  | Ribonucleotide reductase of class II                                                                         |
| 1121 | 2.90 | 1.37E-07 | <i>recQ1</i> | RecQ familyATP-dependent DNA helicase                                                                        |
| 1668 | 2.89 | 1.15E-09 | <i>artM2</i> | amino acid ABC transporter ATP-binding protein                                                               |
| 508  | 2.88 | 8.53E-09 | <i>yesO1</i> | ABC transporter substrate-binding protein                                                                    |
| 1670 | 2.88 | 5.14E-10 | <i>dnaK</i>  | dnak protein,Heat shock protein 70,molecular chaperone DnaK                                                  |
| 1322 | 2.87 | 5.06E-08 | -            | Predicted membrane protein                                                                                   |
| 753  | 2.87 | 3.32E-09 | <i>dinB1</i> | DNA polymerase IV                                                                                            |
| 1671 | 2.86 | 1.15E-09 | <i>grpE</i>  | co-chaperone GrpE,HSP-70 cofactor,heat shock protein GrpE,GrpE                                               |
| 649  | 2.83 | 4.91E-09 | <i>ndk</i>   | nucleoside diphosphate kinase                                                                                |
| 1118 | 2.82 | 1.21E-06 | -            |                                                                                                              |
| 212  | 2.80 | 1.15E-09 | -            | zinc-containing alcohol dehydrogenase                                                                        |
| 1184 | 2.80 | 2.36E-09 | -            | hypothetical protein                                                                                         |

|      |      |          |              |                                                                                                                                                                                               |
|------|------|----------|--------------|-----------------------------------------------------------------------------------------------------------------------------------------------------------------------------------------------|
| 1281 | 2.79 | 4.83E-09 | -            | hypothetical protein                                                                                                                                                                          |
| 1669 | 2.77 | 1.53E-07 | <i>dnaJ</i>  | Chaperone protein DnaJ                                                                                                                                                                        |
| 2192 | 2.77 | 4.27E-05 | -            | CsbD-like protein,CsbD-like                                                                                                                                                                   |
| 1299 | 2.76 | 1.37E-07 | <i>yybR</i>  | transcriptional regulator,Uncharacterized HTH-type transcriptional regulator yybR                                                                                                             |
| 3114 | 2.75 | 1.88E-09 | <i>erm</i>   | rRNA adenine N-6-methyltransferase                                                                                                                                                            |
| 2849 | 2.73 | 2.65E-08 | -            | MazF family toxin-antitoxin system,PemK-like protein                                                                                                                                          |
| 1129 | 2.72 | 1.68E-08 | -            | IDEAL domain-containing protein,hypothetical protein,UPF0302 domain                                                                                                                           |
| 1323 | 2.72 | 6.02E-08 | <i>rnz</i>   | Ribonuclease Z                                                                                                                                                                                |
| 699  | 2.69 | 5.44E-09 | -            | membrane protein                                                                                                                                                                              |
| 4    | 2.67 | 1.97E-09 | <i>recF</i>  | recombination protein F, RecF,DNA replication and repair protein recF                                                                                                                         |
| 1425 | 2.67 | 2.61E-03 | <i>iapI</i>  | peptidase C60,Sortase                                                                                                                                                                         |
| 2848 | 2.65 | 1.23E-08 | -            | DNA-damage-inducible protein,bifunctional antitoxin/transcriptional repressor RelB,addiction module antitoxin, RelB/DinJ family,RelB antitoxin                                                |
| 585  | 2.65 | 6.77E-06 | -            | cell wall surface anchor family protein,Bacterial protein of unknown function (DUF916)                                                                                                        |
| 2303 | 2.65 | 3.99E-07 | <i>nadE</i>  | NH(3)-dependent NAD(+) synthetase                                                                                                                                                             |
| 2137 | 2.64 | 1.38E-08 | <i>radC</i>  | DNA repair protein RadC,hypothetical protein,hypothetical protein,DNA repair protein RadC,Protein of unknown function (DUF2466)                                                               |
| 494  | 2.63 | 7.10E-07 | <i>lpd</i>   | pyridine nucleotide-disulfide oxidoreductase                                                                                                                                                  |
| 543  | 2.63 | 1.69E-09 | <i>topB1</i> | DNA topoisomerase TopB                                                                                                                                                                        |
| 514  | 2.61 | 3.38E-07 | -            | von Willebrand factor domain-containing protein,Predicted outer membrane protein,Cna protein B-type domain                                                                                    |
| 1120 | 2.59 | 2.70E-07 | -            | hypothetical protein                                                                                                                                                                          |
| 1744 | 2.59 | 4.93E-06 | -            | DUF2188 family protein,Uncharacterized protein conserved in bacteria,Uncharacterized protein conserved in bacteria (DUF2188)                                                                  |
| 404  | 2.58 | 3.04E-08 | -            | Urea transporter                                                                                                                                                                              |
| 2307 | 2.56 | 1.80E-07 | <i>ccpB</i>  | LacI family transcriptional regulator,Catabolite control protein B,DNA-binding transcriptional repressor PurR,ABC-type sugar transport system                                                 |
| 1325 | 2.56 | 1.28E-09 | -            | Uncharacterized integral membrane protein                                                                                                                                                     |
| 193  | 2.55 | 2.09E-08 | <i>ytjL</i>  | hemolysin,hypothetical protein,hypothetical protein,Putative Mg <sup>2+</sup> and Co <sup>2+</sup> transporter CorB,gliding motility-associated protein GldE,Domain of unknown function DUF21 |
| 2419 | 2.55 | 1.60E-09 | <i>ecsB</i>  | Bacterial ABC transporter protein EcsB,Predicted ABC-type exoprotein transport system, permease component,Bacterial ABC transporter protein EcsB                                              |
| 403  | 2.54 | 1.44E-07 | <i>emrB1</i> | major facilitator superfamily transporter,Multidrug resistance protein B                                                                                                                      |
| 1567 | 2.54 | 8.20E-07 | -            | alpha crystallin family heat shock protein,T786P28D,Hsp20/alpha crystallin family                                                                                                             |
| 1324 | 2.53 | 8.93E-09 | <i>fabG3</i> | short chain dehydrogenase/reductase family oxidoreductase                                                                                                                                     |
| 2507 | 2.53 | 2.94E-08 | <i>tetR</i>  | TetR family transcriptional regulator,Tetracycline repressor protein class H                                                                                                                  |
| 2780 | 2.53 | 1.15E-09 | -            | Protein of unknown function (DUF664),DinB superfamily                                                                                                                                         |
| 1128 | 2.52 | 6.59E-09 | -            | tetratricopeptide repeat protein,tetratricopeptide repeat protein,Flp pilus assembly protein TadD                                                                                             |
| 1681 | 2.52 | 2.37E-09 | <i>ydeA</i>  | DJ-1/PfpI family protein                                                                                                                                                                      |

|      |      |          |              |                                                                                                                 |
|------|------|----------|--------------|-----------------------------------------------------------------------------------------------------------------|
| 3    | 2.52 | 8.26E-09 | <i>yaaA</i>  | S4 domain protein, YaaA, Uncharacterized conserved protein, S4 domain protein YaaA                              |
| 2699 | 2.51 | 6.66E-05 | <i>iapl</i>  | NlpC/P6 family lipoprotein, Probable endopeptidase p6 precursor                                                 |
| 364  | 2.51 | 1.76E-08 | <i>frmR</i>  | regulator protein FrmR, Copper-sensitive operon repressor, regulator protein FrmR, Uncharacterised BCR, COG1937 |
| 539  | 2.51 | 6.54E-07 | <i>ydhC</i>  | multidrug resistance protein, Inner membrane transport protein ydhC, drug efflux system protein MdtG            |
| 1586 | 2.51 | 1.21E-06 | <i>erpQ</i>  | ErpQ protein                                                                                                    |
| 267  | 2.51 | 2.77E-05 | -            | small secreted protein, Predicted small secreted protein                                                        |
| 399  | 2.50 | 5.43E-09 | <i>paiA</i>  | GNAT family acetyltransferase                                                                                   |
| 320  | 2.49 | 1.15E-09 | <i>sph</i>   | myosin-cross-reactive antigen-like protein                                                                      |
| 1502 | 2.48 | 1.50E-04 | <i>glsA</i>  | glutaminase                                                                                                     |
| 1605 | 2.48 | 1.27E-08 | -            | hypothetical protein                                                                                            |
| 1063 | 2.46 | 1.60E-09 | <i>luxA</i>  | alkanal monooxygenase (FMN-linked)                                                                              |
| 775  | 2.46 | 2.11E-08 | -            | uracil-DNA glycosylase, family 4                                                                                |
| 2700 | 2.46 | 1.93E-03 | -            | conjugative transposon protein, Conjugative transposon protein TcpC                                             |
| 2401 | 2.45 | 5.41E-08 | <i>raraA</i> | crossover junction endodeoxyribonuclease                                                                        |
| 272  | 2.45 | 1.08E-09 | <i>htrA</i>  | Serine protease do-like htrA                                                                                    |
| 363  | 2.44 | 2.97E-07 | -            | DsrE/DsrF-like family protein                                                                                   |
| 5    | 2.43 | 9.99E-10 | <i>gyrB</i>  | DNA gyrase subunit B                                                                                            |
| 584  | 2.42 | 2.04E-08 | -            | WxL domain surface protein                                                                                      |
| 509  | 2.42 | 8.39E-09 | <i>ugpAI</i> | ABC transporter ATP-binding protein                                                                             |
| 2305 | 2.41 | 4.36E-08 | -            | Domain of unknown function (DUF1827)                                                                            |
| 321  | 2.40 | 2.20E-08 | -            | hypothetical protein                                                                                            |
| 3126 | 2.38 | 5.36E-08 | <i>repl</i>  | replication initiation factor, Replication initiation factor                                                    |
| 204  | 2.38 | 7.17E-09 | <i>ubiB</i>  | ubiquinone biosynthesis protein UbiB                                                                            |
| 2035 | 2.38 | 2.05E-09 | <i>est</i>   | carboxylesterase                                                                                                |
| 1469 | 2.37 | 1.12E-08 | -            | lipoprotein, Peptidase propeptide and YPEB domain                                                               |
| 1515 | 2.37 | 1.32E-08 | <i>gls33</i> | general stress protein Gls33, Stress response regulator gls24 homolog, Protein of unknown function (DUF322)     |
| 398  | 2.36 | 1.90E-08 | -            | sortase family protein, Sortase (surface protein transpeptidase), sortase, Sortase family                       |
| 2126 | 2.36 | 1.31E-08 | <i>miaA</i>  | tRNA dimethylallyltransferase                                                                                   |
| 832  | 2.36 | 1.14E-06 | -            | hypothetical protein                                                                                            |
| 495  | 2.36 | 2.24E-08 | <i>yfnB1</i> | isochorismatase hydrolase                                                                                       |
| 1565 | 2.35 | 7.25E-07 | -            | DUF378-containing protein, Domain of unknown function (DUF378)                                                  |
| 1886 | 2.34 | 1.72E-08 | -            | ATPase family protein, Uncharacterized conserved protein                                                        |
| 501  | 2.33 | 1.57E-07 | -            | AbrB family transcriptional regulator                                                                           |
| 445  | 2.33 | 7.12E-08 | <i>spxAI</i> | transcriptional regulator Spx-family, Regulatory protein spx                                                    |
| 51   | 2.33 | 2.59E-06 | -            | amino acid transporter, Type IV secretory pathway, VirB10 components                                            |
| 2425 | 2.33 | 9.19E-08 | -            | DNA double-strand break repair ATPase, Uncharacterized conserved protein                                        |
| 1516 | 2.33 | 9.82E-07 | <i>gapB</i>  | stress response protein, Small integral membrane protein (DUF2273)                                              |
| 840  | 2.33 | 1.65E-03 | -            | prophage pi1 protein 09, Uncharacterized protein conserved in bacteria, Domain of unknown function (DUF771)     |



|      |      |          |              |                                                                                                                                                                                                     |
|------|------|----------|--------------|-----------------------------------------------------------------------------------------------------------------------------------------------------------------------------------------------------|
| 2327 | 2.33 | 1.15E-08 | <i>proW</i>  | Substrate binding domain of ABC-type glycine betaine transport system                                                                                                                               |
| 2420 | 2.31 | 2.25E-08 | <i>ecsA5</i> | ABC transporter ATP-binding protein,ABC-type transporter ATP-binding protein EcsA                                                                                                                   |
| 1285 | 2.30 | 7.77E-09 | -            | hypothetical protein                                                                                                                                                                                |
| 3049 | 2.30 | 2.53E-06 | <i>tee6</i>  | cell wall surface anchor family protein,T6 antigen,Predicted outer membrane protein,fimbrial isopeptide formation D2 domain,Cna protein B-type domain                                               |
| 2891 | 2.30 | 2.67E-08 | -            | transposase,transposase, IS605 OrfB family,Probable transposase                                                                                                                                     |
| 1887 | 2.30 | 5.05E-09 | -            | Protein of unknown function DUF58,Uncharacterized conserved protein                                                                                                                                 |
| 156  | 2.29 | 7.17E-08 | <i>metG1</i> | methionine-tRNA ligase                                                                                                                                                                              |
| 218  | 2.29 | 3.07E-05 | -            | mannosyl-glycoprotein endo-beta-N-acetylglucosaminidase,Endo-beta-N-acetylglucosaminidase D                                                                                                         |
| 961  | 2.28 | 2.51E-09 | <i>mfpsA</i> | glycosyl transferase family protein                                                                                                                                                                 |
| 68   | 2.27 | 6.81E-07 | <i>pdp</i>   | pyrimidine-nucleoside phosphorylase                                                                                                                                                                 |
| 583  | 2.27 | 1.73E-05 | -            | diacylglycerol kinase catalytic subunit,Putative lipid kinase SP_1045                                                                                                                               |
| 1470 | 2.27 | 8.57E-09 | <i>cfa</i>   | cyclopropane-fatty-acyl-phospholipid synthase                                                                                                                                                       |
| 957  | 2.27 | 4.26E-08 | <i>clpE</i>  | ATP-dependent Clp protease                                                                                                                                                                          |
| 2696 | 2.26 | 1.87E-04 | -            | conjugative transposon membrane protein,TcpE family                                                                                                                                                 |
| 502  | 2.26 | 1.05E-08 | <i>ndoA</i>  | toxin-antitoxin system                                                                                                                                                                              |
| 1065 | 2.26 | 1.41E-06 | -            | alpha/beta fold family hydrolase                                                                                                                                                                    |
| 988  | 2.26 | 1.64E-07 | -            | 4-oxalocrotonate tautomerase                                                                                                                                                                        |
| 586  | 2.26 | 4.65E-05 | -            | cell surface protein,Protein of unknown function C-terminal (DUF3324)                                                                                                                               |
| 800  | 2.25 | 4.40E-09 | <i>corA2</i> | MIT family metal ion transporter CorA,magnesium and cobalt transport protein CorA,CorA-like Mg <sup>2+</sup> transporter protein                                                                    |
| 1667 | 2.25 | 5.83E-09 | <i>tcyB</i>  | amino acid ABC transporter amino acid-binding/permease                                                                                                                                              |
| 1514 | 2.25 | 5.04E-09 | -            | transglycosylase,Transglycosylase associated protein                                                                                                                                                |
| 1284 | 2.24 | 8.46E-09 | -            | hypothetical protein                                                                                                                                                                                |
| 530  | 2.23 | 9.75E-10 | -            | hypothetical protein                                                                                                                                                                                |
| 956  | 2.23 | 2.80E-09 | -            | DUF1827 domain protein,Domain of unknown function (DUF1827)                                                                                                                                         |
| 353  | 2.22 | 2.81E-06 | -            | MarR family transcriptional regulator,Uncharacterized protein conserved in archaea,homoprotocatechuate degradation operon regulator, HpaR,MarR family                                               |
| 2034 | 2.22 | 9.99E-10 | <i>rnr</i>   | ribonuclease R                                                                                                                                                                                      |
| 2631 | 2.21 | 1.64E-04 | -            | transcriptional regulator effector binding subunit,Bacterial transcription activator, effector binding domain                                                                                       |
| 57   | 2.19 | 3.72E-08 | <i>dhfr2</i> | dihydrofolate reductase                                                                                                                                                                             |
| 1984 | 2.19 | 6.79E-07 | -            | general stress protein,Gas vesicle protein,YtxH-like protein                                                                                                                                        |
| 141  | 2.19 | 6.71E-05 | -            | hypothetical protein                                                                                                                                                                                |
| 3069 | 2.18 | 1.33E-09 | -            | hypothetical protein                                                                                                                                                                                |
| 2555 | 2.18 | 2.88E-08 | -            | conserved hypothetical protein TIGR01033,Probable transcriptional regulatory protein HI_0315,hypothetical protein,DNA-binding regulatory protein, YebC/PmpR family,Domain of unknown function DUF28 |
| 1517 | 2.18 | 4.97E-07 | <i>gapA3</i> | stress response protein                                                                                                                                                                             |

|      |      |          |              |                                                                                                                                                                                                                                    |
|------|------|----------|--------------|------------------------------------------------------------------------------------------------------------------------------------------------------------------------------------------------------------------------------------|
| 2125 | 2.18 | 2.05E-09 | <i>hflX</i>  | GTP-binding protein HflX,GTP-binding protein HflX,GTPase HflX,Predicted GTPase,GTP-binding protein HflX,GTPase of unknown function                                                                                                 |
| 1732 | 2.17 | 6.47E-08 | -            | putative uroporphyrin-III c-methyltransferase,Uncharacterized conserved protein,Protein of unknown function, DUF488                                                                                                                |
| 1604 | 2.17 | 6.02E-09 | <i>gpmA1</i> | phosphoglycerate mutase                                                                                                                                                                                                            |
| 157  | 2.17 | 5.67E-09 | <i>fabG1</i> | aldose dehydrogenase                                                                                                                                                                                                               |
| 2378 | 2.17 | 1.84E-07 | -            | competence protein CoiA-like family protein,Competence protein,Competence protein CoiA-like family                                                                                                                                 |
| 680  | 2.15 | 1.51E-06 | <i>pnuC</i>  | nicotinamide mononucleotide transporter PnuC,Nicotinamide mononucleotide transporter,nicotinamide mononucleotide transporter PnuC,Nicotinamide mononucleotide transporter                                                          |
| 1995 | 2.15 | 5.64E-08 | -            | YibE/F-like protein,YibE/F-like protein                                                                                                                                                                                            |
| 2101 | 2.15 | 1.60E-09 | -            | DUF1292 family protein,hypothetical protein,hypothetical protein,Uncharacterized protein conserved in bacteria,Protein of unknown function (DUF1292)                                                                               |
| 1360 | 2.14 | 1.97E-06 | <i>ypsA</i>  | YpsA like protein,hypothetical protein,hypothetical protein,Uncharacterized protein conserved in bacteria,Protein of unknown function (DUF1273)                                                                                    |
| 743  | 2.13 | 4.50E-09 | -            | Putative virion core protein                                                                                                                                                                                                       |
| 2127 | 2.12 | 2.53E-08 | <i>ugpQ</i>  | glycerophosphodiester phosphodiesterase family protein                                                                                                                                                                             |
| 1159 | 2.12 | 9.12E-08 | <i>yccU</i>  | CoA-binding protein,hypothetical protein,acetyl coenzyme A synthetase (ADP forming), alpha domain,CoA binding domain                                                                                                               |
| 2186 | 2.11 | 2.14E-06 | -            | DRTGG domain-containing protein,putative manganese-dependent inorganic pyrophosphatase,Predicted transcriptional regulator containing CBS domains,inosine-5'-monophosphate dehydrogenase,DRTGG domain                              |
| 3070 | 2.11 | 1.30E-07 | <i>nrnA1</i> | Relaxase/mobilization nuclease domain protein                                                                                                                                                                                      |
| 2130 | 2.11 | 8.46E-09 | -            | GNAT family acetyltransferase,ribosomal-protein-alanine acetyltransferase,Acetyltransferase (GNAT) family                                                                                                                          |
| 1047 | 2.10 | 2.48E-07 | -            | hypothetical protein                                                                                                                                                                                                               |
| 1247 | 2.10 | 7.92E-09 | <i>tufA</i>  | elongation factor EF1A                                                                                                                                                                                                             |
| 1267 | 2.09 | 8.53E-09 | -            | hypothetical protein                                                                                                                                                                                                               |
| 684  | 2.09 | 5.91E-09 | -            | GNAT family acetyltransferase,ribosomal-protein-alanine acetyltransferase,Acetyltransferase (GNAT) family                                                                                                                          |
| 2328 | 2.08 | 4.91E-08 | <i>proV2</i> | glycine betaine transporter ATP-binding subunit                                                                                                                                                                                    |
| 270  | 2.08 | 1.27E-08 | -            | universal stress family protein,Putative universal stress protein SAV1710                                                                                                                                                          |
| 531  | 2.08 | 9.75E-10 | <i>prs2</i>  | ribose-phosphate pyrophosphokinase                                                                                                                                                                                                 |
| 1665 | 2.07 | 2.27E-09 | <i>uvrA</i>  | excinuclease ABC subunit A,Excinuclease ABC subunit A,excinuclease ABC subunit A,ABC-type transport system involved in cytochrome bd biosynthesis, fused ATPase and permease components,excinuclease ABC subunit A,ABC transporter |
| 2363 | 2.07 | 4.81E-04 | -            | hypothetical protein                                                                                                                                                                                                               |
| 2893 | 2.06 | 4.05E-05 | <i>treB</i>  | PTS system mannose/fructose/sorbose transporter subunit IIA                                                                                                                                                                        |
| 1140 | 2.06 | 3.24E-08 | -            | DegV family protein,DegV domain-containing protein SPy_1493/M5005_Spy1226,EDD domain protein                                                                                                                                       |
| 2426 | 2.06 | 8.93E-09 | <i>yfkN</i>  | Ser/Thr protein phosphatase family protein                                                                                                                                                                                         |

|      |      |          |              |                                                                                                                                   |
|------|------|----------|--------------|-----------------------------------------------------------------------------------------------------------------------------------|
| 648  | 2.05 | 5.90E-05 | -            | transcriptional regulator,transcriptional activator, Rgg/GadR/MutR family, C-terminal domain,Helix-turn-helix domain              |
| 245  | 2.05 | 2.11E-05 | -            | deoxynucleoside kinase,Deoxyguanosine kinase,thymidylate kinase,Deoxynucleoside kinase                                            |
| 1858 | 2.05 | 2.24E-08 | -            | hypothetical protein                                                                                                              |
| 1720 | 2.04 | 1.60E-09 | <i>arcA</i>  | arginine deiminase                                                                                                                |
| 2179 | 2.04 | 2.69E-07 | -            | hypothetical protein                                                                                                              |
| 176  | 2.04 | 5.52E-08 | -            | hypothetical protein                                                                                                              |
| 1201 | 2.04 | 5.74E-08 | -            | transposase,transposase, IS605 OrfB family,Probable transposase                                                                   |
| 3071 | 2.04 | 8.91E-07 | <i>mobC</i>  | Bacterial mobilization protein C,Bacterial mobilisation protein (MobC)                                                            |
| 1908 | 2.03 | 3.41E-09 | -            | hypothetical protein                                                                                                              |
| 2193 | 2.03 | 3.45E-07 | -            | transposase,transposase, IS605 OrfB family,Probable transposase                                                                   |
| 3127 | 2.03 | 3.24E-08 | <i>rep2</i>  | replication initiation factor,Replication initiation factor                                                                       |
| 517  | 2.02 | 8.03E-04 | <i>iap1</i>  | peptidase C60,Sortase                                                                                                             |
| 10   | 2.02 | 7.14E-09 | <i>nrnA1</i> | DHH family protein                                                                                                                |
| 3066 | 2.02 | 3.60E-07 | -            | transposase like protein,Transposase and inactivated derivatives,Transposase IS200 like                                           |
| 2983 | 2.02 | 2.34E-06 | <i>hin2</i>  | Site-specific recombinases, DNA invertase Pin homologs,DNA-invertase hin,multiple promoter invertase,Resolvase, N terminal domain |
| 155  | 2.02 | 2.32E-08 | -            | M protein trans-acting positive regulator,Mga helix-turn-helix domain                                                             |
| 3122 | 2.01 | 6.09E-07 | -            | transposase like protein,Transposase and inactivated derivatives,Transposase IS200 like                                           |
| 446  | 2.01 | 1.18E-07 | <i>spxA2</i> | Spx/MgsR family transcriptional regulator                                                                                         |
| 2692 | 2.01 | 4.83E-09 | -            | hypothetical protein                                                                                                              |
| 2037 | 2.01 | 3.04E-09 | -            | GNAT family acetyltransferase,ribosomal-protein-alanine acetyltransferase                                                         |
| 1478 | 2.01 | 2.22E-07 | -            | peroxiredoxin, Ohr family protein,Organic hydroperoxide resistance protein-like,peroxiredoxin, Ohr subfamily,OsmC-like protein    |
| 693  | 2.00 | 1.03E-08 | -            | zinc-containing alcohol dehydrogenase,Zinc-type alcohol dehydrogenase-like protein SA1988                                         |
| 1190 | 2.00 | 5.30E-06 | -            | hypothetical protein                                                                                                              |
| 2167 | 2.00 | 9.52E-09 | <i>prsA1</i> | peptidyl-prolyl isomerase                                                                                                         |
| 512  | 2.00 | 8.94E-08 | <i>ybjG</i>  | undecaprenyl-diphosphatase                                                                                                        |
| 2187 | 1.99 | 3.24E-07 | -            | metallo-beta-lactamase domain-containing protein,hypothetical protein,metal-dependent hydrolase,Beta-lactamase superfamily domain |
| 3120 | 1.99 | 4.08E-07 | -            | transposase like protein,Transposase and inactivated derivatives,Transposase IS200 like                                           |
| 3112 | 1.99 | 3.81E-09 | -            | Bacterial epsilon antitoxin.,Antitoxin epsilon,Bacterial epsilon antitoxin                                                        |
| 1200 | 1.99 | 2.97E-07 | -            | transposase like protein,Transposase and inactivated derivatives,Transposase IS200 like                                           |
| 3119 | 1.99 | 1.27E-07 | -            | transposase,transposase, IS605 OrfB family,Probable transposase                                                                   |
| 217  | 1.99 | 3.13E-05 | -            | mannosyl-glycoprotein endo-beta-N-acetylglucosaminidase,Endo-beta-N-acetylglucosaminidase D                                       |

|      |      |          |              |                                                                                                                   |
|------|------|----------|--------------|-------------------------------------------------------------------------------------------------------------------|
| 2890 | 1.99 | 5.81E-07 | -            | transposase like protein,Transposase and inactivated derivatives,Transposase IS200 like                           |
| 261  | 1.98 | 1.19E-08 | <i>nnrD</i>  | YjeF protein,ADP-dependent (S)-NAD(P)H-hydrate dehydratase                                                        |
| 2986 | 1.98 | 6.29E-08 | -            | hypothetical protein                                                                                              |
| 1334 | 1.98 | 5.24E-08 | <i>cysK</i>  | cysteine synthase A                                                                                               |
| 223  | 1.98 | 8.22E-08 | -            | transposase like protein,Transposase and inactivated derivatives,Transposase IS200 like                           |
| 224  | 1.97 | 3.86E-07 | -            | transposase,transposase, IS605 OrfB family,Probable transposase                                                   |
| 3123 | 1.96 | 1.60E-07 | -            | transposase,transposase, IS605 OrfB family,Probable transposase                                                   |
| 2578 | 1.96 | 1.79E-07 | <i>xylF</i>  | phospholipase                                                                                                     |
| 1888 | 1.95 | 1.46E-08 | -            | Transglutaminase-like superfamily,Uncharacterized protein conserved in bacteria,Transglutaminase-like superfamily |
| 1442 | 1.95 | 2.33E-07 | -            | transposase,transposase, IS605 OrfB family,Probable transposase                                                   |
| 2085 | 1.95 | 4.98E-08 | <i>gsiA1</i> | ABC transporter ATP-binding protein                                                                               |
| 395  | 1.94 | 6.59E-09 | <i>treB</i>  | PTS system glucose-specific transporter subunit IIABC                                                             |
| 938  | 1.94 | 5.75E-09 | <i>ghrB</i>  | 4-phosphoerythronate dehydrogenase                                                                                |
| 604  | 1.94 | 3.02E-05 | -            | hypothetical protein                                                                                              |
| 2842 | 1.93 | 2.89E-03 | -            | hypothetical protein                                                                                              |
| 2194 | 1.93 | 4.98E-07 | -            | transposase like protein,Transposase and inactivated derivatives,Transposase IS200 like                           |
| 683  | 1.93 | 4.45E-07 | -            | primosomal protein N                                                                                              |
| 3067 | 1.93 | 2.80E-07 | -            | transposase,transposase, IS605 OrfB family,Probable transposase                                                   |
| 1666 | 1.92 | 2.06E-09 | <i>ltrA1</i> | excinuclease ABC subunit B                                                                                        |
| 62   | 1.92 | 2.99E-06 | -            | Protein of unknown function (DUF3173),.Domain of unknown function (DUF3173)                                       |
| 2310 | 1.91 | 1.06E-07 | <i>groL</i>  | chaperonin,hypothetical protein,chaperonin GroEL,chaperonin GroL,TCP-1/cpn60 chaperonin family                    |
| 2059 | 1.91 | 3.53E-08 | <i>gloA</i>  | lactoylglutathione lyase                                                                                          |
| 605  | 1.91 | 4.08E-07 | -            | relaxase,Relaxase/Mobilisation nuclease domain                                                                    |
| 11   | 1.90 | 7.67E-08 | <i>rplI</i>  | 50S ribosomal protein L9,BL17                                                                                     |
| 1994 | 1.90 | 5.78E-06 | -            | YibE/F-like protein,YibE/F-like protein                                                                           |
| 2304 | 1.90 | 1.39E-05 | -            | Nicotinate phosphoribosyltransferase                                                                              |
| 63   | 1.90 | 1.51E-08 | <i>xerC1</i> | site-specific tyrosine recombinase XerC-family                                                                    |
| 685  | 1.89 | 2.11E-07 | -            | hypothetical protein                                                                                              |
| 2242 | 1.89 | 2.77E-06 | <i>acm</i>   | Collagen-binding protein,Collagen adhesin precursor,Predicted outer membrane protein,Collagen binding domain      |
| 661  | 1.88 | 2.27E-07 | -            | Uncharacterized protein conserved in bacteria,Domain of unknown function (DUF305)                                 |
| 486  | 1.88 | 2.00E-09 | -            | phosphoenolpyruvate carboxykinase                                                                                 |
| 366  | 1.88 | 6.87E-08 | <i>cdr1</i>  | coenzyme A disulfide reductase                                                                                    |
| 1731 | 1.87 | 4.95E-07 | -            | zinc-containing alcohol dehydrogenase                                                                             |
| 2987 | 1.87 | 3.55E-08 | -            | hypothetical protein                                                                                              |
| 211  | 1.87 | 2.67E-07 | <i>rpsN1</i> | 30S ribosomal protein S14                                                                                         |
| 3111 | 1.86 | 7.27E-08 | -            | Omega Transcriptional Repressor                                                                                   |
| 510  | 1.85 | 8.31E-08 | <i>ycjP1</i> | ABC transporter permease,Inner membrane                                                                           |

|      |      |          |              |                                                                                                                                                        |
|------|------|----------|--------------|--------------------------------------------------------------------------------------------------------------------------------------------------------|
| 269  | 1.85 | 1.85E-08 | <i>trxA1</i> | thioredoxin                                                                                                                                            |
| 1985 | 1.84 | 6.60E-06 | -            | extracellular protein                                                                                                                                  |
| 2619 | 1.83 | 4.04E-07 | -            | ABC transporter ATP-binding protein                                                                                                                    |
| 2157 | 1.83 | 4.82E-08 | -            | hypothetical protein                                                                                                                                   |
| 2373 | 1.82 | 4.50E-09 | <i>relA1</i> | GTP diphosphokinase                                                                                                                                    |
| 1659 | 1.82 | 2.04E-05 | -            | hypothetical protein                                                                                                                                   |
| 2183 | 1.82 | 2.06E-09 | -            | ATP-dependent Zn protease                                                                                                                              |
| 2054 | 1.82 | 4.20E-05 | <i>ywiB</i>  | DUF1934-containing protein,Uncharacterized beta-barrel protein ywiB,Uncharacterized protein conserved in bacteria,Domain of unknown function (DUF1934) |
| 1338 | 1.81 | 1.09E-07 | -            | hypothetical protein                                                                                                                                   |
| 402  | 1.80 | 7.65E-07 | -            | MerR family transcriptional regulator,Hg(II)-responsive transcriptional regulator,MerR family regulatory protein                                       |
| 869  | 1.80 | 2.12E-05 | -            | Major phage capsid protein,Predicted phage phi-C31 gp36 major capsid-like protein,phage major capsid protein, HK97 family,Phage capsid family          |
| 698  | 1.80 | 3.06E-08 | -            | GNAT family acetyltransferase,ribosomal-protein-alanine acetyltransferase,Acetyltransferase (GNAT) family                                              |
| 2697 | 1.79 | 6.20E-05 | -            | ATP/GTP-binding protein,Type IV secretory pathway, VirB4 components,type-IV secretion system protein TraC,AAA-like domain                              |
| 1782 | 1.79 | 9.61E-09 | -            | hypothetical protein                                                                                                                                   |
| 3047 | 1.78 | 2.34E-04 | -            | cell wall surface anchor family protein                                                                                                                |
| 540  | 1.78 | 2.06E-04 | -            | multidrug resistance protein,drug efflux system protein MdtG,sugar efflux transporter,Major Facilitator Superfamily                                    |
| 516  | 1.77 | 1.77E-04 | -            | LPXTG-motif protein cell wall anchor domain protein,Predicted outer membrane protein,fimbrial isopeptide formation D2 domain,Cna protein B-type domain |
| 742  | 1.77 | 7.77E-09 | -            | Primosomal protein N' (replication factor Y) - superfamily II helicase                                                                                 |
| 2793 | 1.77 | 9.52E-09 | <i>clpC</i>  | negative regulator of genetic competence ClpC/MecB                                                                                                     |
| 1409 | 1.76 | 1.14E-08 | -            | 3-demethylubiquinone-9 3-methyltransferase,hypothetical protein,3-demethylubiquinone-9 3-methyltransferase                                             |
| 595  | 1.76 | 6.36E-02 | -            | Type IV secretory pathway, VirB4 components                                                                                                            |
| 2046 | 1.76 | 9.85E-08 | <i>gapA1</i> | glyceraldehyde-3-phosphate dehydrogenase                                                                                                               |
| 515  | 1.75 | 4.02E-05 | -            | LPXTG-motif protein cell wall anchor domain protein,Predicted outer membrane protein                                                                   |
| 2313 | 1.74 | 1.97E-08 | <i>treB</i>  | ,PTS system oligo-beta-mannoside-specific EIIC component                                                                                               |
| 606  | 1.74 | 7.33E-05 | -            | Bacterial mobilisation protein (MobC),.Bacterial mobilisation protein (MobC)                                                                           |
| 1719 | 1.74 | 4.24E-09 | <i>arcB</i>  | ornithine carbamoyltransferase                                                                                                                         |
| 3053 | 1.74 | 3.54E-08 | <i>nrnA1</i> | PemK family protein                                                                                                                                    |
| 136  | 1.73 | 1.29E-07 | <i>yueI</i>  | hypothetical protein,Uncharacterized conserved protein,Protein of unknown function (DUF1694)                                                           |
| 2995 | 1.73 | 1.51E-05 | -            | IS1216 transposase                                                                                                                                     |
| 1764 | 1.72 | 2.45E-06 | -            | HI0933-like protein,hypothetical protein,tricarballoylate dehydrogenase,Aspartate oxidase,flavoprotein,                                                |
| 2693 | 1.72 | 5.18E-06 | <i>thiF</i>  | thiamine biosynthesis protein ThiF                                                                                                                     |
| 71   | 1.72 | 1.84E-05 | <i>tmpC</i>  | ABC superfamily ATP binding cassette transporter                                                                                                       |
| 2615 | 1.71 | 1.60E-04 | -            | major facilitator superfamily transporter,Arabinose efflux permease,multidrug resistance protein,Major Facilitator Superfamily                         |
| 1206 | 1.71 | 3.71E-05 | -            | hypothetical protein                                                                                                                                   |

|      |      |          |              |                                                                                                              |
|------|------|----------|--------------|--------------------------------------------------------------------------------------------------------------|
| 2033 | 1.71 | 8.33E-09 | <i>smpB</i>  | SsrA-binding protein,SsrA-binding protein,SsrA-binding protein,SsrA-binding protein,SmpB protein             |
| 2092 | 1.70 | 1.48E-07 | -            | WxL domain surface protein                                                                                   |
| 187  | 1.70 | 1.07E-08 | <i>nadR</i>  | transcriptional regulator,hypothetical protein,Predicted small molecule binding protein (contains 3H domain) |
| 3113 | 1.70 | 2.94E-08 | <i>fruA1</i> | PTS system fructose-specific transporter subunit IIA                                                         |
| 6    | 1.70 | 2.02E-09 | <i>gyrB</i>  | DNA gyrase subunit A                                                                                         |
| 1721 | 1.69 | 1.44E-07 | <i>ntcA</i>  | cyclic nucleotide-binding domain-containing protein,Global nitrogen regulator                                |
| 281  | 1.69 | 2.28E-03 | -            | Antirestriction protein,Antirestriction protein,Antirestriction protein (ArdA)                               |
| 2115 | 1.68 | 8.87E-08 | <i>yheS2</i> | ABC transporter ATP-binding protein,Uncharacterized ABC transporter ATP-binding protein YheS                 |
| 191  | 1.68 | 1.84E-03 | -            | transglycosylase,Transglycosylase associated protein                                                         |
| 2372 | 1.68 | 2.02E-08 | <i>ppnK</i>  | inorganic polyphosphate/ATP-NAD kinase                                                                       |
| 2577 | 1.68 | 8.80E-07 | -            | bacterial seryl-tRNA synthetase related protein,Uncharacterized protein conserved in bacteria                |
| 1950 | 1.68 | 4.94E-06 | <i>ybeZ</i>  | KH domain-containing protein,PhoH-like protein,hypothetical protein                                          |
| 52   | 1.67 | 4.54E-03 | <i>pgdS</i>  | NlpC/P6 family lipoprotein                                                                                   |
| 69   | 1.67 | 1.20E-06 | <i>deoC</i>  | deoxyribose-phosphate aldolase                                                                               |
| 2045 | 1.67 | 2.00E-09 | <i>pgk</i>   | phosphoglycerate kinase                                                                                      |
| 2892 | 1.66 | 3.24E-06 | <i>licB1</i> | PTS system mannose/fructose/sorbose transporter subunit IIB                                                  |
| 1455 | 1.66 | 1.75E-08 | -            | hypothetical protein                                                                                         |
| 3059 | 1.66 | 2.26E-04 | -            | DNA-directed RNA polymerase beta subunit                                                                     |
| 2188 | 1.65 | 2.35E-07 | <i>ybaK2</i> | proline--tRNA ligase                                                                                         |
| 2634 | 1.65 | 4.38E-04 | <i>lacF2</i> | D-xylulose kinase                                                                                            |
| 425  | 1.65 | 4.20E-08 | -            | N-acetylmuramoyl-L-alanine amidase                                                                           |
| 434  | 1.65 | 1.86E-07 | <i>yhhT1</i> | Protein of unknown function UPF0118,hypothetical protein,pheromone autoinducer 2 transporter                 |
| 2043 | 1.64 | 3.55E-09 | <i>eno</i>   | enolase                                                                                                      |
| 1853 | 1.64 | 5.47E-05 | -            | LPXTG-motif protein cell wall anchor domain protein,Predicted outer membrane protein                         |
| 1709 | 1.64 | 3.17E-05 | <i>pyrH</i>  | UMP kinase                                                                                                   |
| 414  | 1.64 | 9.74E-04 | -            | integral membrane protein,Protein of unknown function (DUF554)                                               |
| 1993 | 1.64 | 3.41E-09 | -            | Hypothetical protein                                                                                         |
| 474  | 1.63 | 2.63E-07 | <i>araC1</i> | AraC-like ligand binding domain protein,Arabinose operon regulatory protein                                  |
| 1202 | 1.63 | 5.18E-09 | <i>yuaG</i>  | SPFH domain / Band 7 family protein,Inner membrane protein yqiK                                              |
| 3048 | 1.63 | 5.98E-07 | -            | sortase family protein,Sortase (surface protein transpeptidase),sortase,Sortase family                       |
| 3058 | 1.62 | 4.33E-08 | <i>polC1</i> | DNA polymerase IV                                                                                            |
| 1352 | 1.62 | 1.44E-07 | -            | transposase (21),Transposase and inactivated derivatives                                                     |
| 2794 | 1.62 | 2.95E-08 | <i>ctsR</i>  | CtsR family transcriptional regulator,Class three stress gene repressor                                      |
| 3052 | 1.62 | 1.73E-07 | <i>mazE</i>  | PemI family protein,Antitoxin MazE                                                                           |
| 2252 | 1.61 | 2.07E-07 | <i>rimN</i>  | Sua5/YciO/YrdC/YwlC family protein,t(6)A37 threonylcarbamoyladenosine biosynthesis protein RimN              |
| 2077 | 1.61 | 1.32E-07 | <i>ltrA1</i> | excinuclease ABC subunit C                                                                                   |

|      |      |          |              |                                                                                                                                      |
|------|------|----------|--------------|--------------------------------------------------------------------------------------------------------------------------------------|
| 2138 | 1.60 | 1.54E-08 | <i>yidA1</i> | HAD-superfamily hydrolase                                                                                                            |
| 365  | 1.60 | 1.80E-04 | <i>moeZ</i>  | rhodanese-like domain-containing protein,Probable adenylyltransferase/sulfurtransferase MoeZ                                         |
| 2007 | 1.60 | 4.44E-08 | -            | ribosomal subunit interface protein,hypothetical protein                                                                             |
| 695  | 1.60 | 6.30E-04 | -            | M protein trans-acting positive regulator,Mga helix-turn-helix domain                                                                |
| 2038 | 1.59 | 4.98E-07 | -            | Alpha/beta hydrolase family protein                                                                                                  |
| 260  | 1.58 | 3.67E-08 | -            | thioesterase,hypothetical protein,acyl-CoA thioesterase YbgC,acyl-CoA thioester hydrolase, YbgC/YbaW family,Thioesterase superfamily |
| 2334 | 1.58 | 3.38E-09 | <i>nrdE2</i> | ribonucleoside-diphosphate reductase subunit alpha                                                                                   |
| 663  | 1.57 | 2.06E-08 | -            | Eps11J                                                                                                                               |
| 1170 | 1.57 | 2.13E-07 | <i>galS</i>  | LacI family transcriptional regulator,Mgl repressor and galactose ultrainduction factor                                              |
| 382  | 1.57 | 4.71E-07 | <i>ecsA1</i> | ABC transporter ATP-binding protein,ABC-type transporter ATP-binding protein EcsA                                                    |
| 1454 | 1.57 | 7.43E-09 | -            | hypothetical protein                                                                                                                 |
| 2280 | 1.57 | 5.00E-08 | -            | rhodanese-like domain-containing protein,thiosulfate sulfurtransferase,Uncharacterized conserved protein                             |
| 2931 | 1.57 | 2.57E-07 | -            | IS431 mec transposase,Integrase core domain                                                                                          |
| 2623 | 1.57 | 2.73E-08 | <i>ydhF</i>  | short chain dehydrogenase/reductase family oxidoreductase                                                                            |
| 3099 | 1.56 | 2.89E-07 | -            | toxin-antitoxin system, antitoxin component                                                                                          |
| 686  | 1.56 | 7.07E-08 | <i>yidA1</i> | HAD superfamily hydrolase                                                                                                            |
| 949  | 1.56 | 6.97E-08 | <i>mutY</i>  | A/G-specific adenine glycosylase                                                                                                     |
| 2055 | 1.56 | 4.18E-07 | <i>lipL</i>  | lipoate-protein ligase A                                                                                                             |
| 2185 | 1.56 | 3.20E-07 | <i>nrnA1</i> | DHHA1 domain protein                                                                                                                 |
| 511  | 1.55 | 8.22E-08 | -            | integral membrane protein,Predicted integral membrane protein,Protein of unknown function, DUF624                                    |
| 2778 | 1.54 | 4.04E-06 | <i>gsiA1</i> | ABC transporter ATP-binding protein                                                                                                  |
| 2698 | 1.54 | 1.46E-05 | -            | membrane protein                                                                                                                     |
| 675  | 1.54 | 1.72E-04 | <i>sugE</i>  | SMR family multidrug resistance protein,Quaternary ammonium compound-resistance protein sugE,multidrug efflux system protein         |
| 496  | 1.53 | 2.78E-08 | <i>yxaF</i>  | TetR family transcriptional regulator,Uncharacterized HTH-type transcriptional regulator yxaF                                        |
| 2933 | 1.53 | 1.05E-06 | <i>xerD3</i> | phage integrase,Tyrosine recombinase XerD,site-specific tyrosine recombinase XerD                                                    |
| 1509 | 1.53 | 4.87E-06 | -            | hypothetical protein                                                                                                                 |
| 1320 | 1.52 | 5.07E-08 | <i>gapA1</i> | glyceraldehyde-3-phosphate dehydrogenase                                                                                             |
| 1468 | 1.52 | 1.20E-07 | <i>pyrDA</i> | dihydroorotate dehydrogenase 1A                                                                                                      |
| 225  | 1.51 | 6.53E-08 | <i>gsiA1</i> | glycine betaine/carnitine/choline transporter ATP-binding protein                                                                    |
| 1603 | 1.51 | 3.67E-08 | <i>gph</i>   | phosphoglycolate phosphatase                                                                                                         |
| 70   | 1.51 | 6.54E-06 | <i>cdd</i>   | cytidine deaminase                                                                                                                   |
| 3095 | 1.50 | 9.30E-08 | -            | Reverse transcriptase (RNA-dependent DNA polymerase)                                                                                 |
| 3098 | 1.50 | 1.66E-07 | <i>relE2</i> | addiction module toxin RelE                                                                                                          |
| 2165 | 1.49 | 4.12E-07 | <i>yugI1</i> | general stress protein 13,General stress protein 13,hypothetical protein,ribosomal protein S1,S1 RNA binding domain                  |
| 1340 | 1.49 | 2.88E-06 | -            | MarR family transcriptional regulator,MarR family                                                                                    |
| 1176 | 1.49 | 6.59E-09 | <i>gor1</i>  | pyridine nucleotide-disulfide oxidoreductase                                                                                         |

|      |      |          |               |                                                                                                                                                                                                                                                                            |
|------|------|----------|---------------|----------------------------------------------------------------------------------------------------------------------------------------------------------------------------------------------------------------------------------------------------------------------------|
| 227  | 1.49 | 4.20E-08 | -             | calcium-translocating P-type ATPase,Calcium-transporting ATPase lmo0841,magnesium-transporting ATPase                                                                                                                                                                      |
| 2777 | 1.49 | 2.04E-06 | <i>lsrC2</i>  | amino acid or sugar ABC transport system, permease protein,Autoinducer 2 import system permease protein lsrC                                                                                                                                                               |
| 666  | 1.48 | 1.09E-06 | <i>yheS1</i>  | ABC transporter ATP-binding protein,Uncharacterized ABC transporter ATP-binding protein YheS,ABC transporter ATP-binding protein,ABC-type transport system involved in cytochrome c biogenesis, ATPase component,ATP-binding cassette protein, ChvD family,ABC transporter |
| 1204 | 1.48 | 4.18E-07 | -             | membrane spanning protein,Predicted membrane protein,DUF939 C-terminal domain                                                                                                                                                                                              |
| 2197 | 1.48 | 1.08E-02 | -             | putative phosphosugar isomerase/binding protein,hypothetical protein                                                                                                                                                                                                       |
| 2579 | 1.48 | 6.21E-08 | -             | hypothetical protein                                                                                                                                                                                                                                                       |
| 2683 | 1.48 | 1.06E-04 | <i>hpaIIM</i> | C-5 cytosine-specific DNA methylase                                                                                                                                                                                                                                        |
| 2253 | 1.48 | 3.05E-07 | -             | methyltransferase,ubiquinone/menaquinone biosynthesis methyltransferase                                                                                                                                                                                                    |
| 2044 | 1.48 | 6.17E-09 | <i>tpiA</i>   | triosephosphate isomerase                                                                                                                                                                                                                                                  |
| 1952 | 1.47 | 2.25E-05 | <i>brnQ2</i>  | branched-chain amino acid transport system II carrier protein                                                                                                                                                                                                              |
| 2173 | 1.47 | 3.32E-08 | <i>yutD</i>   | Hypothetical DUF1027 protein,hypothetical protein,Uncharacterized protein conserved in bacteria,Protein of unknown function (DUF1027)                                                                                                                                      |
| 2311 | 1.47 | 1.36E-07 | <i>groS</i>   | chaperonin GroS,hypothetical protein                                                                                                                                                                                                                                       |
| 1272 | 1.47 | 7.67E-08 | <i>gloB</i>   | hydroxyacylglutathione hydrolase                                                                                                                                                                                                                                           |
| 2232 | 1.47 | 2.71E-06 | -             | GNAT family acetyltransferase,ribosomal-protein-alanine acetyltransferase,Acetyltransferase (GNAT) family                                                                                                                                                                  |
| 2093 | 1.47 | 2.55E-07 | -             | Integrase core domain protein,Transposase and inactivated derivatives, IS30 family,Integrase core domain                                                                                                                                                                   |
| 2302 | 1.46 | 1.52E-06 | -             | ArsR family transcriptional regulator,Uncharacterized protein conserved in archaea,CRISPR locus-related DNA-binding protein,Helix-turn-helix domain                                                                                                                        |
| 497  | 1.46 | 1.38E-07 | -             | DUF159 family protein,Uncharacterised ACR, COG2135                                                                                                                                                                                                                         |
| 1186 | 1.46 | 6.79E-06 | -             | hypothetical protein                                                                                                                                                                                                                                                       |
| 2686 | 1.46 | 2.97E-02 | -             | Cro/CI family transcriptional regulator,Predicted transcriptional regulator,Replication initiation factor                                                                                                                                                                  |
| 498  | 1.46 | 9.00E-08 | -             | DUF159 family protein,Uncharacterised ACR, COG2135                                                                                                                                                                                                                         |
| 284  | 1.46 | 1.61E-04 | -             | amino acid transporter                                                                                                                                                                                                                                                     |
| 2627 | 1.45 | 7.67E-08 | <i>treB</i>   | PTS system N-acetyl glucosamine specific transporter subunits IIABC                                                                                                                                                                                                        |
| 2321 | 1.45 | 4.45E-07 | -             | DegV family protein,Domain of unknown function (DUF1836)                                                                                                                                                                                                                   |
| 2083 | 1.45 | 5.02E-04 | <i>lytA1</i>  | N-acetylmuramoyl-L-alanine amidase                                                                                                                                                                                                                                         |
| 2156 | 1.45 | 1.10E-04 | <i>xyIF</i>   | alpha/beta hydrolase family protein                                                                                                                                                                                                                                        |
| 186  | 1.45 | 1.32E-07 | <i>maa</i>    | maltose O-acetyltransferase                                                                                                                                                                                                                                                |
| 1209 | 1.45 | 2.25E-08 | -             | dihydrodipicolinate synthase/N-acetylneuraminase lyase,keto-hydroxyglutarate-aldolase/keto-deoxy-phosphogluconate aldolase                                                                                                                                                 |
| 158  | 1.45 | 6.15E-08 | <i>queT1</i>  | membrane protein,Queuosine precursor ECF transporter S component QueT                                                                                                                                                                                                      |
| 1174 | 1.44 | 2.74E-08 | <i>opuCC2</i> | glycine betaine/carnitine/choline ABC transporter,Osmoprotectant-binding protein                                                                                                                                                                                           |
| 262  | 1.44 | 9.15E-07 | <i>pepV</i>   | dipeptidase PepV                                                                                                                                                                                                                                                           |
| 948  | 1.44 | 3.04E-07 | <i>recX</i>   | recombination regulator RecX                                                                                                                                                                                                                                               |



|      |      |          |               |                                                                                                                                                                               |
|------|------|----------|---------------|-------------------------------------------------------------------------------------------------------------------------------------------------------------------------------|
| 1708 | 1.44 | 2.00E-06 | <i>frf</i>    | ribosome recycling factor                                                                                                                                                     |
| 2320 | 1.44 | 4.76E-07 | -             | EDD domain-containing protein, DegV family                                                                                                                                    |
| 2139 | 1.43 | 2.09E-08 | <i>folC</i>   | tetrahydrofolate synthase                                                                                                                                                     |
| 1837 | 1.43 | 8.41E-07 | <i>ltrA2</i>  | group II intron reverse transcriptase maturase, Group II intron-encoded protein ItrA, Retron-type reverse transcriptase, Reverse transcriptase (RNA-dependent DNA polymerase) |
| 48   | 1.42 | 1.07E-06 | -             | hypothetical protein                                                                                                                                                          |
| 2936 | 1.41 | 1.15E-06 | -             | ISEnfa3, transposase, Transposase and inactivated derivatives, Transposase                                                                                                    |
| 2776 | 1.41 | 1.12E-06 | -             | ABC transporter ATP-binding protein                                                                                                                                           |
| 2172 | 1.41 | 1.21E-08 | <i>yfnB1</i>  | HAD superfamily hydrolase                                                                                                                                                     |
| 400  | 1.41 | 1.12E-04 | <i>padC</i>   | Phenolic acid decarboxylase                                                                                                                                                   |
| 2637 | 1.40 | 5.06E-07 | -             | zinc-containing alcohol dehydrogenase                                                                                                                                         |
| 2912 | 1.40 | 6.11E-07 | <i>xerS</i>   | tyrosine recombinase                                                                                                                                                          |
| 454  | 1.40 | 8.87E-06 | <i>cysM</i>   | cysteine synthase A                                                                                                                                                           |
| 2616 | 1.40 | 1.22E-02 | -             | multidrug-efflux transporter, drug resistance MFS transporter, drug:H <sup>+</sup> antiporter-2 (14 Spanner) (DHA2) family, Major Facilitator Superfamily                     |
| 2996 | 1.39 | 2.31E-07 | -             | Integrase core domain protein, Integrase core domain                                                                                                                          |
| 870  | 1.39 | 4.43E-03 | -             | prophage pi2 protein 34                                                                                                                                                       |
| 628  | 1.39 | 6.19E-06 | <i>ytcD</i>   | HxIR-like helix-turn-helix protein, Uncharacterized HTH-type transcriptional regulator ytcD, HxIR-like helix-turn-helix                                                       |
| 1441 | 1.38 | 4.28E-07 | -             | Integrase core domain protein, Integrase core domain                                                                                                                          |
| 799  | 1.38 | 2.45E-07 | -             | hypothetical protein                                                                                                                                                          |
| 3041 | 1.38 | 7.37E-07 | -             | Integrase core domain protein                                                                                                                                                 |
| 3008 | 1.37 | 5.39E-07 | -             | Integrase core domain protein                                                                                                                                                 |
| 3110 | 1.37 | 4.50E-07 | -             | Integrase core domain protein                                                                                                                                                 |
| 3079 | 1.37 | 1.18E-06 | -             | Integrase core domain protein                                                                                                                                                 |
| 2301 | 1.37 | 5.62E-05 | <i>xsa</i>    | alpha-N-arabinofuranosidase                                                                                                                                                   |
| 294  | 1.37 | 8.03E-07 | -             | Integrase core domain protein, Integrase core domain                                                                                                                          |
| 1813 | 1.37 | 2.85E-03 | <i>sacA</i>   | glycosyl hydrolase family protein                                                                                                                                             |
| 1527 | 1.36 | 2.33E-06 | -             | glucose uptake protein                                                                                                                                                        |
| 2997 | 1.36 | 3.31E-07 | -             | addiction module toxin, Txe/YoeB family, addiction module toxin, Txe/YoeB family, Plasmid encoded toxin Txe                                                                   |
| 3060 | 1.36 | 2.83E-05 | -             | hypothetical protein                                                                                                                                                          |
| 347  | 1.36 | 3.90E-07 | <i>pbuG</i>   | xanthine/uracil permease family protein, Guanine/hypoxanthine permease pbuG, Permeases, Permease family                                                                       |
| 3050 | 1.36 | 7.61E-07 | -             | Integrase core domain protein, Integrase core domain                                                                                                                          |
| 16   | 1.36 | 1.07E-05 | -             | membrane protein, acid-resistance membrane protein, Uncharacterized conserved protein                                                                                         |
| 3064 | 1.36 | 6.03E-07 | -             | Integrase core domain protein, Integrase core domain                                                                                                                          |
| 1817 | 1.36 | 3.86E-04 | <i>treB</i>   | PTS system mannose-specific transporter subunit IIC                                                                                                                           |
| 361  | 1.36 | 1.64E-07 | <i>mutS21</i> | DNA mismatch repair protein MutS2                                                                                                                                             |
| 2935 | 1.35 | 3.58E-05 | -             | transposase, IS66 Orf2 like protein                                                                                                                                           |
| 3093 | 1.35 | 5.88E-07 | -             | Integrase core domain protein, Integrase core domain                                                                                                                          |
| 1403 | 1.35 | 6.53E-07 | -             | hypothetical protein                                                                                                                                                          |

|      |      |          |              |                                                                                                                                                            |
|------|------|----------|--------------|------------------------------------------------------------------------------------------------------------------------------------------------------------|
| 2289 | 1.35 | 1.48E-03 | <i>hprA</i>  | D-isomer specific 2-hydroxyacid dehydrogenase                                                                                                              |
| 465  | 1.35 | 6.59E-09 | <i>npr2</i>  | NADH peroxidase                                                                                                                                            |
| 591  | 1.34 | 1.42E-02 | <i>traG</i>  | TraG/TraD family protein,Conjugal transfer protein traG                                                                                                    |
| 1444 | 1.34 | 2.06E-06 | -            | Integrase core domain protein,Integrase core domain                                                                                                        |
| 291  | 1.34 | 1.16E-06 | -            | Integrase core domain protein,Integrase core domain                                                                                                        |
| 3118 | 1.34 | 1.74E-06 | -            | Integrase core domain protein,Integrase core domain                                                                                                        |
| 2181 | 1.34 | 1.10E-02 | -            | TetR/AcrR family transcriptional regulator                                                                                                                 |
| 1491 | 1.33 | 8.56E-08 | <i>ybaL</i>  | CPA2 family monovalent cation:proton (H <sup>+</sup> ) antiporter-2,Inner membrane protein ybaL,glutathione-regulated potassium-efflux system protein KefC |
| 2047 | 1.33 | 2.54E-07 | <i>cggR</i>  | central glycolytic genes regulator,Central glycolytic genes regulator,transcriptional regulator LsrR                                                       |
| 940  | 1.33 | 1.50E-06 | <i>czcD</i>  | cation diffusion facilitator family transporter,Cadmium, cobalt and zinc/H(+)-K(+) antiporter                                                              |
| 247  | 1.33 | 7.11E-06 | -            | pentapeptide repeat-containing protein,Uncharacterized protein conserved in bacteria,Pentapeptide repeats (8 copies)                                       |
| 1427 | 1.33 | 1.22E-07 | -            | TetR/AcrR family transcriptional regulator                                                                                                                 |
| 3045 | 1.32 | 1.38E-07 | <i>fms20</i> | LPXTG family cell surface protein Fms20,fimbrial isopeptide formation D2 domain                                                                            |
| 2971 | 1.31 | 2.48E-07 | -            | Integrase core domain protein,Integrase core domain                                                                                                        |
| 2592 | 1.31 | 1.22E-07 | <i>nrnA1</i> | DNA recombination protein RecA                                                                                                                             |
| 2151 | 1.31 | 3.38E-04 | <i>fruA1</i> | Fructosamine kinase                                                                                                                                        |
| 1815 | 1.31 | 1.24E-04 | <i>treB</i>  | PTS system mannose/fructose/sorbose transporter subunit IIB                                                                                                |
| 185  | 1.31 | 2.13E-07 | <i>cobB</i>  | NAD-dependent deacetylase                                                                                                                                  |
| 2547 | 1.31 | 1.19E-08 | <i>yugI2</i> | S1 RNA binding domain-containing protein,General stress protein 13                                                                                         |
| 1139 | 1.31 | 4.45E-07 | <i>yqfA</i>  | hemolysin III family channel protein,hypothetical protein                                                                                                  |
| 2546 | 1.30 | 8.38E-07 | <i>tilS</i>  | tRNA(Ile)-lysidine synthase                                                                                                                                |
| 1173 | 1.30 | 1.28E-03 | -            | hypothetical protein                                                                                                                                       |
| 2324 | 1.30 | 4.25E-04 | <i>entF</i>  | enterocin induction factor                                                                                                                                 |
| 1208 | 1.30 | 8.35E-08 | <i>lytG</i>  | N-acetylmuramoyl-L-alanine amidase                                                                                                                         |
| 2308 | 1.30 | 1.01E-03 | -            | hypothetical protein                                                                                                                                       |
| 1271 | 1.30 | 7.02E-07 | <i>gpmA1</i> | phosphoglycerate mutase family protein                                                                                                                     |
| 2985 | 1.30 | 7.74E-07 | -            | Integrase core domain protein,Integrase core domain                                                                                                        |
| 951  | 1.30 | 5.57E-06 | -            | GNAT family acetyltransferase,ribosomal-protein-alanine acetyltransferase,Acetyltransferase (GNAT) family                                                  |
| 1885 | 1.29 | 2.88E-06 | -            | hypothetical protein                                                                                                                                       |
| 2086 | 1.29 | 1.64E-06 | -            | efflux ABC transporter permease,FtsX-like permease family                                                                                                  |
| 522  | 1.29 | 2.43E-07 | -            | tellurite resistance protein,TelA-like protein SA1238,Toxic anion resistance protein (TelA)                                                                |
| 1207 | 1.29 | 8.25E-07 | -            | serine-type D-Ala-D-Ala carboxypeptidase,D-alanyl-D-alanine carboxypeptidase,D-alanyl-D-alanine carboxypeptidase                                           |
| 2576 | 1.29 | 1.11E-06 | <i>yicC</i>  | YicC protein,hypothetical protein                                                                                                                          |
| 1160 | 1.29 | 2.82E-06 | <i>parE</i>  | DNA topoisomerase (ATP-hydrolyzing) subunit ParE                                                                                                           |
| 1175 | 1.27 | 3.06E-08 | <i>proV1</i> | ABC transporter ATP-binding protein,Glycine betaine/L-proline transport ATP-binding protein ProV,component                                                 |
| 741  | 1.27 | 5.84E-08 | -            | Beta-propeller domains of methanol dehydrogenase type,Domain of unknown function (DUF477)                                                                  |
| 2342 | 1.27 | 3.17E-06 | -            | SNARE associated Golgi protein                                                                                                                             |

|      |      |          |              |                                                                                                           |
|------|------|----------|--------------|-----------------------------------------------------------------------------------------------------------|
| 2976 | 1.26 | 1.07E-06 | -            | Integrase core domain protein,Integrase core domain                                                       |
| 493  | 1.26 | 5.38E-04 | <i>ohrB</i>  | peroxiredoxin, Ohr family protein,General stress protein                                                  |
| 2921 | 1.26 | 9.23E-06 | <i>bin31</i> | resolvase family site-specific recombinase,Putative transposon Tn552 DNA-invertase bin3                   |
| 2661 | 1.26 | 3.70E-05 | -            | prevent-host-death family protein,prevent-host-death family protein                                       |
| 536  | 1.26 | 3.86E-08 | <i>mnmA</i>  | tRNA-specific 2-thiouridylase MnmA                                                                        |
| 1379 | 1.26 | 2.40E-04 | <i>rnhA</i>  | ribonuclease HI                                                                                           |
| 1814 | 1.25 | 1.50E-03 | <i>fruA1</i> | PTS system mannose-specific transporter subunit IIA                                                       |
| 2283 | 1.25 | 4.66E-07 | <i>treB</i>  | PTS system glucitol/sorbitol transporter subunit IIA                                                      |
| 1529 | 1.25 | 4.82E-07 | -            | Pyrimidine dimer DNA glycosylase,conserved hypothetical protein,Pyrimidine dimer DNA glycosylase          |
| 2548 | 1.25 | 3.32E-08 | -            | septum formation initiator,Septum formation initiator                                                     |
| 2502 | 1.25 | 3.75E-05 | <i>xerC9</i> | site-specific tyrosine recombinase XerC-family                                                            |
| 2590 | 1.24 | 3.38E-07 | <i>proC</i>  | pyrroline-5-carboxylate reductase                                                                         |
| 2102 | 1.24 | 3.97E-06 | <i>ndoA</i>  | Holliday junction resolvase-like protein                                                                  |
| 1145 | 1.24 | 2.48E-07 | <i>sipS</i>  | signal peptidase I                                                                                        |
| 1205 | 1.23 | 5.22E-07 | <i>afr</i>   | dehydrogenase                                                                                             |
| 1172 | 1.23 | 6.98E-04 | -            | YitT family protein,Uncharacterized BCR, YitT family COG1284                                              |
| 523  | 1.23 | 6.18E-08 | -            | 5-bromo-4-chloroindolyl phosphate hydrolysis protein                                                      |
| 1292 | 1.23 | 5.34E-07 | -            | hypothetical protein                                                                                      |
| 319  | 1.23 | 2.47E-08 | <i>fdh</i>   | S-(hydroxymethyl)glutathione dehydrogenase                                                                |
| 2618 | 1.22 | 9.62E-06 | -            | putative integral membrane protein,Protein of unknown function (DUF2798)                                  |
| 2371 | 1.22 | 3.03E-07 | <i>rluD2</i> | 23S rRNA pseudouridylate synthase RluD                                                                    |
| 599  | 1.22 | 1.11E-01 | <i>topB1</i> | DNA topoisomerase III                                                                                     |
| 14   | 1.22 | 1.20E-05 | -            | DegV family protein                                                                                       |
| 142  | 1.22 | 2.28E-02 | <i>pheS1</i> | phenylalanyl-tRNA synthetase subunit alpha                                                                |
| 2930 | 1.22 | 6.36E-07 | -            | Integrase core domain protein                                                                             |
| 2129 | 1.22 | 1.12E-05 | <i>clpP1</i> | ATP-dependent Clp protease proteolytic subunit ClpP                                                       |
| 3061 | 1.22 | 5.42E-05 | <i>prgN1</i> | replication control protein PrgN                                                                          |
| 1572 | 1.22 | 4.39E-07 | -            | GNAT family acetyltransferase,ribosomal-protein-alanine acetyltransferase,Acetyltransferase (GNAT) family |
| 2993 | 1.21 | 3.14E-06 | -            | Integrase core domain protein,Integrase core domain                                                       |
| 318  | 1.21 | 2.05E-07 | -            | hypothetical protein                                                                                      |
| 1771 | 1.21 | 7.65E-04 | -            | ABC superfamily ATP binding cassette transporter, ABC protein                                             |
| 846  | 1.21 | 7.51E-04 | -            | phage protein,Protein of unknown function (DUF1071)                                                       |
| 985  | 1.20 | 1.05E-04 | -            | hypothetical protein                                                                                      |
| 2103 | 1.20 | 7.36E-07 | -            | Hypothetical protein possible functionally linked with Alanyl-tRNA synthetase                             |
| 1861 | 1.20 | 1.19E-06 | <i>azr</i>   | flavin reductase,NADPH azoreductase                                                                       |
| 323  | 1.20 | 3.53E-07 | -            | membrane protein,Protein of unknown function (DUF1622)                                                    |
| 2184 | 1.20 | 6.09E-06 | <i>phnA</i>  | putative alkylphosphonate utilization operon protein PhnA                                                 |
| 1816 | 1.20 | 3.24E-04 | <i>treB</i>  | PTS system mannose-specific transporter subunit IID                                                       |
| 1746 | 1.20 | 9.89E-05 | <i>cbh1</i>  | choloylglycine hydrolase family protein                                                                   |
| 2394 | 1.19 | 1.47E-07 | <i>cypC</i>  | Cytochrome P45,Fatty-acid peroxygenase                                                                    |

|      |      |          |              |                                                                                                                                                                                     |
|------|------|----------|--------------|-------------------------------------------------------------------------------------------------------------------------------------------------------------------------------------|
| 308  | 1.19 | 1.61E-03 | <i>treB</i>  | PTS system lactose/cellobiose transporter subunit IIC                                                                                                                               |
| 1038 | 1.19 | 8.83E-04 | <i>glpR</i>  | DeoR family transcriptional regulator,Glycerol-3-phosphate regulon repressor                                                                                                        |
| 2041 | 1.19 | 7.84E-08 | <i>dapE</i>  | succinyl-diaminopimelate desuccinylase                                                                                                                                              |
| 2370 | 1.18 | 1.34E-07 | <i>mgtE</i>  | magnesium transporter,Magnesium transporter mgtE,inosine 5'-monophosphate dehydrogenase                                                                                             |
| 1133 | 1.18 | 5.00E-08 | -            | hypothetical protein                                                                                                                                                                |
| 1751 | 1.18 | 1.02E-06 | -            | cupin superfamily protein,Cupin domain                                                                                                                                              |
| 2220 | 1.18 | 5.60E-07 | -            | hypothetical protein                                                                                                                                                                |
| 2932 | 1.17 | 8.25E-07 | -            | hypothetical protein                                                                                                                                                                |
| 2241 | 1.17 | 1.29E-04 | <i>proX2</i> | YbaK/prolyl-tRNA synthetase-associated domain protein                                                                                                                               |
| 535  | 1.17 | 1.27E-06 | -            | Predicted phosphoesterase or phosphohydrolase,Calcineurin-like phosphoesterase superfamily domain                                                                                   |
| 1435 | 1.16 | 2.14E-06 | <i>xerC5</i> | site-specific tyrosine recombinase XerC-family                                                                                                                                      |
| 2595 | 1.16 | 2.23E-08 | -            | transcriptional regulator,Uncharacterized protein conserved in bacteria,Helix-turn-helix domain                                                                                     |
| 1052 | 1.16 | 2.79E-05 | -            | ISEnfa3, transposase,Transposase and inactivated derivatives                                                                                                                        |
| 1131 | 1.16 | 3.77E-07 | -            | NUDIX family hydrolase,NADH pyrophosphatase,NTP pyrophosphohydrolases containing a Zn-finger, probably nucleic-acid-binding,Hydrolase of X-linked nucleoside diphosphate N terminal |
| 2256 | 1.15 | 3.28E-05 | -            | GNAT family acetyltransferase,ribosomal-protein-alanine acetyltransferase                                                                                                           |
| 2335 | 1.15 | 7.63E-07 | <i>nrdE2</i> | ribonucleotide-diphosphate reductase subunit beta                                                                                                                                   |
| 412  | 1.15 | 5.60E-07 | <i>phoR1</i> | sensor histidine kinase,Alkaline phosphatase synthesis sensor protein phoR                                                                                                          |
| 587  | 1.15 | 1.12E-05 | -            | WxL domain surface protein                                                                                                                                                          |
| 461  | 1.15 | 4.00E-06 | <i>asd</i>   | aspartate-semialdehyde dehydrogenase                                                                                                                                                |
| 1293 | 1.14 | 9.84E-08 | -            | hypothetical protein                                                                                                                                                                |
| 384  | 1.14 | 2.13E-07 | -            | polysaccharide deacetylase                                                                                                                                                          |
| 324  | 1.14 | 1.74E-03 | -            | M protein trans-acting positive regulator                                                                                                                                           |
| 2694 | 1.14 | 1.72E-04 | -            | conserved hypothetical protein                                                                                                                                                      |
| 2030 | 1.13 | 7.74E-08 | <i>atpC</i>  | ATP synthase F subunit B                                                                                                                                                            |
| 3080 | 1.13 | 7.98E-06 | -            | ISEnfa3, transposase,Transposase and inactivated derivatives,Transposase                                                                                                            |
| 2743 | 1.13 | 1.99E-05 | -            | ISEnfa3, transposase,Transposase and inactivated derivatives,Transposase                                                                                                            |
| 1658 | 1.13 | 1.13E-01 | -            | hypothetical protein                                                                                                                                                                |
| 1959 | 1.13 | 3.44E-07 | <i>czrA</i>  | ArsR family transcriptional regulator,HTH-type transcriptional repressor CzrA                                                                                                       |
| 1371 | 1.12 | 2.22E-05 | -            | hypothetical protein                                                                                                                                                                |
| 1657 | 1.12 | 7.48E-07 | -            | bifunctional disulfide isomerase/thiol-disulfide oxidase,Protein-disulfide isomerase                                                                                                |
| 1812 | 1.12 | 5.29E-04 | -            | Glyoxalase-like domain protein,methylmalonyl-CoA epimerase,Glyoxalase-like domain                                                                                                   |
| 2920 | 1.12 | 8.67E-07 | <i>rpiR2</i> | RpiR family phosphosugar-binding transcriptional regulator,Als operon repressor                                                                                                     |
| 1545 | 1.11 | 1.43E-05 | <i>murR1</i> | phosphosugar isomerase transcriptional regulator,MurPQ operon repressor                                                                                                             |
| 1752 | 1.11 | 1.30E-05 | -            | carboxymuconolactone decarboxylase family protein                                                                                                                                   |
| 2597 | 1.11 | 6.99E-07 | <i>iapl</i>  | Peptidase M16 inactive domain protein                                                                                                                                               |

|      |      |          |              |                                                                                                                                                                                       |
|------|------|----------|--------------|---------------------------------------------------------------------------------------------------------------------------------------------------------------------------------------|
| 838  | 1.11 | 7.31E-04 | -            | toxin-antitoxin system, toxin component, Bro family, Uncharacterized phage-encoded protein, Phage antirepressor protein KilAC domain                                                  |
| 2665 | 1.10 | 3.76E-04 | <i>nrnA1</i> | relaxase/mobilization nuclease domain protein                                                                                                                                         |
| 499  | 1.10 | 2.07E-02 | -            | hypothetical protein                                                                                                                                                                  |
| 1877 | 1.10 | 6.12E-06 | -            | hypothetical protein                                                                                                                                                                  |
| 2894 | 1.09 | 9.13E-04 | <i>treB</i>  | PTS system mannose/fructose/sorbose transporter subunit IIC                                                                                                                           |
| 3087 | 1.09 | 3.05E-07 | <i>prgO</i>  | Prg family replication protein PrgO                                                                                                                                                   |
| 2626 | 1.09 | 2.66E-06 | <i>sacT</i>  | BglG family transcriptional antiterminator, Levansucrase and sucrose synthesis operon antiterminator                                                                                  |
| 2988 | 1.09 | 4.02E-05 | -            | Domain of unknown function (DUF1906)                                                                                                                                                  |
| 3115 | 1.09 | 5.34E-06 | <i>aphA</i>  | kanamycin kinase                                                                                                                                                                      |
| 457  | 1.09 | 2.92E-06 | <i>dapF</i>  | diaminopimelate epimerase                                                                                                                                                             |
| 2084 | 1.09 | 7.61E-07 | <i>icaR</i>  | TetR family transcriptional regulator, Intercellular adhesion protein R                                                                                                               |
| 613  | 1.09 | 2.90E-05 | -            | ISEnfa3, transposase, Transposase and inactivated derivatives, Transposase                                                                                                            |
| 1917 | 1.08 | 1.94E-04 | <i>acyP</i>  | acylphosphatase                                                                                                                                                                       |
| 721  | 1.08 | 1.41E-06 | <i>xerC3</i> | site-specific tyrosine recombinase XerC-family, Integrase, site-specific tyrosine recombinase XerC, Site-specific recombinase XerD, tyrosine recombinase XerC, Phage integrase family |
| 2191 | 1.08 | 1.19E-03 | <i>gsiA1</i> | ABC transporter ATP-binding protein                                                                                                                                                   |
| 396  | 1.08 | 6.97E-06 | -            | endonuclease/exonuclease/phosphatase family protein, Uncharacterized protein conserved in bacteria                                                                                    |
| 2596 | 1.08 | 1.74E-07 | -            | M16C subfamily protease, protease3, coenzyme PQQ biosynthesis protein PqqF, Insulinase (Peptidase family M16)                                                                         |
| 118  | 1.08 | 3.64E-06 | <i>truA1</i> | tRNA pseudouridine synthase A                                                                                                                                                         |
| 1171 | 1.08 | 4.30E-07 | -            | hypothetical protein                                                                                                                                                                  |
| 431  | 1.08 | 8.86E-06 | <i>gsiA1</i> | ABC superfamily ATP binding cassette transporter                                                                                                                                      |
| 937  | 1.07 | 3.96E-07 | -            | HesB-like domain-containing protein, Iron-sulphur cluster biosynthesis                                                                                                                |
| 1694 | 1.07 | 1.80E-07 | <i>xpkA</i>  | Xylulose-5-phosphate phosphoketolase                                                                                                                                                  |
| 1600 | 1.06 | 1.36E-04 | -            | ISEnfa3, transposase, Transposase and inactivated derivatives, Transposase                                                                                                            |
| 2237 | 1.06 | 8.34E-05 | <i>fliY</i>  | family 3 extracellular solute-binding protein, Sulfate starvation-induced protein 7                                                                                                   |
| 1982 | 1.06 | 2.43E-07 | <i>ccpA3</i> | catabolite control protein A, Catabolite control protein, DNA-binding transcriptional regulator CytR, ABC-type sugar transport system                                                 |
| 1311 | 1.05 | 3.01E-06 | <i>ykuL</i>  | CBS domain pair protein                                                                                                                                                               |
| 450  | 1.05 | 9.30E-06 | <i>bsaA</i>  | glutathione peroxidase                                                                                                                                                                |
| 2827 | 1.05 | 1.36E-06 | -            | Integrase core domain protein, Integrase core domain                                                                                                                                  |
| 17   | 1.05 | 1.05E-06 | <i>pox5</i>  | pyruvate oxidase                                                                                                                                                                      |
| 3089 | 1.05 | 1.63E-06 | <i>repR</i>  | plasmid replication protein RepR, Primase C terminal 1 (PriCT-1)                                                                                                                      |
| 651  | 1.04 | 7.90E-07 | <i>mgtA</i>  | magnesium-translocating P-type ATPase                                                                                                                                                 |
| 53   | 1.04 | 5.72E-03 | -            | Conjugative transposon protein, Conjugative transposon protein TcpC                                                                                                                   |
| 1606 | 1.04 | 4.25E-06 | -            | transcriptional regulator                                                                                                                                                             |
| 462  | 1.04 | 9.01E-06 | <i>lysC</i>  | aspartate kinase                                                                                                                                                                      |

|      |      |          |              |                                                                                                                                                        |
|------|------|----------|--------------|--------------------------------------------------------------------------------------------------------------------------------------------------------|
| 2717 | 1.03 | 4.93E-02 | -            | Integrase,Transposase and inactivated derivatives, IS30 family                                                                                         |
| 2098 | 1.03 | 2.79E-04 | <i>mleP</i>  | CCS family citrate:sodium (Na <sup>+</sup> ) symporter,Citrate transporter,citrate carrier protein, CCS family,2-hydroxycarboxylate transporter family |
| 655  | 1.03 | 7.91E-03 | <i>cbiO</i>  | ABC transporter ATP-binding protein                                                                                                                    |
| 2575 | 1.03 | 1.80E-06 | -            | hypothetical protein                                                                                                                                   |
| 2599 | 1.03 | 3.44E-07 | -            | acetyltransferase,hypothetical protein,putative acyltransferase                                                                                        |
| 1867 | 1.03 | 2.10E-06 | <i>phoP</i>  | response regulator receiver domain-containing protein                                                                                                  |
| 3125 | 1.03 | 2.47E-04 | <i>bin34</i> | Resolvase protein,Putative transposon Tn552 DNA-invertase bin3,multiple promoter invertase,Resolvase, N terminal domain                                |
| 1992 | 1.03 | 1.79E-07 | -            | PspC domain-containing protein,phage shock protein C,PspC domain                                                                                       |
| 2282 | 1.03 | 1.76E-07 | <i>yhhT3</i> | permease,hypothetical protein,pheromone autoinducer 2 transporter,sporulation integral membrane protein YtvI,Domain of unknown function DUF20          |
| 3000 | 1.02 | 1.81E-06 | <i>repA</i>  | replication initiator protein A,Replication initiator protein A (RepA) N-terminus                                                                      |
| 189  | 1.02 | 1.10E-06 | <i>rpsO</i>  | 30S ribosomal protein S15,BS18,30S ribosomal protein S15,ribosomal protein S15,Ribosomal protein S15                                                   |
| 458  | 1.02 | 2.56E-06 | <i>dapA</i>  | dihydrodipicolinate synthase                                                                                                                           |
| 600  | 1.02 | 1.59E-01 | -            | Antirestriction protein (ArdA)                                                                                                                         |
| 720  | 1.02 | 5.85E-04 | -            | Domain of unknown function (DUF3173)                                                                                                                   |
| 1559 | 1.02 | 1.67E-04 | -            | ISEnfa3, transposase,Transposase and inactivated derivatives,Transposase                                                                               |
| 2213 | 1.02 | 4.96E-06 | <i>mgsA</i>  | methylglyoxal synthase                                                                                                                                 |
| 1766 | 1.02 | 2.53E-06 | <i>aroD</i>  | 3-dehydroquinone dehydratase                                                                                                                           |
| 1585 | 1.01 | 1.70E-06 | <i>nrdR</i>  | transcriptional repressor NrdR                                                                                                                         |
| 879  | 1.01 | 6.04E-03 | -            | phage minor structural protein, region,Phage-related protein,phage minor structural protein, N-terminal region,Prophage endopeptidase tail             |
| 1876 | 1.00 | 9.56E-05 | -            | ISEnfa3, transposase,Transposase and inactivated derivatives,Transposase                                                                               |

36 \*Locus\_tag: identifier corresponding to reference genome sequence, prefix to all  
37 numbers listed is “RBWH1\_”, \*\*logFC: log<sub>2</sub> fold change, \*\*\*FDR: false discovery  
38 rate.

39

40 **Supplementary Table 2f.** VRE RBWH1 down-regulated genes following 1 h treatment  
41 with 1.75 μM PBT2 and 128 μM zinc in CAMHB grown at 37°C.

| Locus_tag* | LogFC** | FDR***   | Gene         | Putative gene product function                                                                                                     |
|------------|---------|----------|--------------|------------------------------------------------------------------------------------------------------------------------------------|
| 2731       | -8.04   | 3.38E-07 | -            | hypothetical protein                                                                                                               |
| 2734       | -7.46   | 9.92E-09 | <i>mntB2</i> | cation ABC transporter permease,Manganese transport system membrane protein mntB,high-affinity zinc transporter membrane component |

|      |       |          |              |                                                                                                                                                                                                                                                                                                                                             |
|------|-------|----------|--------------|---------------------------------------------------------------------------------------------------------------------------------------------------------------------------------------------------------------------------------------------------------------------------------------------------------------------------------------------|
| 2732 | -7.32 | 1.19E-08 | -            | iron-dependent repressor family protein,manganese transport transcriptional regulator                                                                                                                                                                                                                                                       |
| 479  | -6.94 | 2.26E-08 | <i>fhuC</i>  | ABC transporter ATP-binding protein,Iron(3+)-hydroxamate import ATP-binding protein FhuC,manganese/iron transporter                                                                                                                                                                                                                         |
| 31   | -6.69 | 1.98E-11 | <i>lacGI</i> | 6-phospho-beta-galactosidase                                                                                                                                                                                                                                                                                                                |
| 480  | -6.68 | 1.34E-07 | <i>mntB1</i> | metal ion ABC transporter permease,Manganese transport system membrane protein mntB,high-affinity zinc transporter membrane component                                                                                                                                                                                                       |
| 32   | -6.68 | 1.34E-10 | <i>lacF1</i> | PTS system lactose-diacetylchitobiose-beta-glucoside transporter subunit IIA                                                                                                                                                                                                                                                                |
| 2733 | -6.51 | 9.63E-10 | <i>ssaB2</i> | adhesion lipoprotein,Saliva-binding protein,high-affinity zinc transporter periplasmic component,ABC-type Zn <sup>2+</sup> transport system                                                                                                                                                                                                 |
| 2735 | -6.48 | 2.00E-09 | <i>hmuV</i>  | ABC transporter ATP-binding protein,Hemin import ATP-binding protein HmuV,manganese/iron transporter                                                                                                                                                                                                                                        |
| 481  | -6.34 | 4.16E-09 | <i>ssaB1</i> | periplasmic solute binding protein,Saliva-binding protein,high-affinity zinc transporter periplasmic component                                                                                                                                                                                                                              |
| 137  | -6.31 | 2.06E-09 | <i>fecD</i>  | iron ABC transporter system permease,Iron(III) dicitrate transport system permease protein fecD                                                                                                                                                                                                                                             |
| 33   | -6.24 | 1.13E-09 | <i>lacE1</i> | PTS system, lactose-specific IIC component                                                                                                                                                                                                                                                                                                  |
| 138  | -5.84 | 5.16E-10 | <i>feuC1</i> | iron ABC transporter system permease,Iron-uptake system permease protein FeuC                                                                                                                                                                                                                                                               |
| 1072 | -5.74 | 2.07E-05 | -            | hypothetical protein                                                                                                                                                                                                                                                                                                                        |
| 1475 | -5.70 | 1.18E-05 | <i>bbmA</i>  | alpha amylase                                                                                                                                                                                                                                                                                                                               |
| 1070 | -5.66 | 3.35E-06 | <i>gatB1</i> | PTS system galactitol-specific transporter subunit IIB,                                                                                                                                                                                                                                                                                     |
| 1236 | -5.58 | 4.53E-08 | <i>chvE</i>  | multiple sugar-binding periplasmic receptor ChvE family protein,Multiple sugar-binding periplasmic protein sbpA precursor,D-xylose transporter subunit XylF,ABC-type xylose transport system, periplasmic component,D-xylose ABC transporter, D-xylose-binding protein,Periplasmic binding proteins and sugar binding domain of LacI family |
| 30   | -5.43 | 2.09E-09 | <i>lacR1</i> | DeoR family transcriptional regulator, lactose phosphotransferase system repressor,Lactose phosphotransferase system repressor,DNA-binding transcriptional repressor SrlR,Phosphotransferase system, mannose/fructose/N-acetylgalactosamine-specific component IIB,Bacterial regulatory proteins, deoR family                               |
| 1071 | -5.40 | 7.53E-07 | <i>gatC1</i> | PTS system galactitol-specific transporter subunit IIC                                                                                                                                                                                                                                                                                      |
| 139  | -5.26 | 9.75E-10 | <i>yclP</i>  | iron ABC transporter ATP-binding protein                                                                                                                                                                                                                                                                                                    |
| 1370 | -5.22 | 1.55E-09 | <i>steT1</i> | amino acid permease,Serine/threonine exchanger SteT,putative fructoselysine transporter                                                                                                                                                                                                                                                     |
| 29   | -5.08 | 9.75E-10 | <i>yvdM1</i> | beta-phosphoglucomutase                                                                                                                                                                                                                                                                                                                     |
| 1369 | -4.96 | 1.28E-08 | -            | NAD-dependent nucleoside-diphosphate-sugar epimerase                                                                                                                                                                                                                                                                                        |
| 1473 | -4.88 | 7.00E-07 | <i>malF</i>  | ABC transporter permease,Maltose transport system permease protein malF                                                                                                                                                                                                                                                                     |
| 1237 | -4.87 | 2.51E-07 | <i>araG</i>  | ABC transporter ATP-binding protein,Xylose import ATP-binding protein                                                                                                                                                                                                                                                                       |
| 387  | -4.84 | 1.23E-09 | <i>ddc2</i>  | tyrosine decarboxylase                                                                                                                                                                                                                                                                                                                      |
| 1368 | -4.80 | 5.50E-09 | -            | Putative 8-amino-7-oxononanoate synthase/2-amino-3-ketobutyrate coenzyme A ligase                                                                                                                                                                                                                                                           |
| 140  | -4.76 | 5.48E-10 | <i>fetB</i>  | ferric (Fe <sup>+3</sup> ) ABC superfamily ATP binding cassette transporter, binding protein                                                                                                                                                                                                                                                |
| 1513 | -4.74 | 3.89E-06 | -            | hypothetical protein                                                                                                                                                                                                                                                                                                                        |
| 1068 | -4.69 | 5.34E-06 | <i>fruB</i>  | PTS system galactitol transporter subunit IIA                                                                                                                                                                                                                                                                                               |

|      |       |          |              |                                                                                                                                                                                                                                               |
|------|-------|----------|--------------|-----------------------------------------------------------------------------------------------------------------------------------------------------------------------------------------------------------------------------------------------|
| 1476 | -4.61 | 3.14E-07 | -            | integral membrane protein,Uncharacterized BCR, YitT family COG1284                                                                                                                                                                            |
| 2267 | -4.59 | 1.45E-05 | <i>mtlF1</i> | PTS system mannitol-specific transporter subunit IIA                                                                                                                                                                                          |
| 1486 | -4.57 | 2.92E-09 | <i>ahpC</i>  | alkyl hydroperoxide reductase subunit C                                                                                                                                                                                                       |
| 2729 | -4.55 | 1.37E-07 | <i>cbiQ</i>  | Cobalt transport protein,ABC-type cobalt transport system, permease component CbiQ and related transporters,Cobalt transport protein                                                                                                          |
| 473  | -4.53 | 3.36E-10 | <i>melB</i>  | sodium/galactoside symporter,Thiomethylgalactoside permease II,melibiose:sodium symporter,sugar (Glycoside-Pentoside-Hexuronide) transporter,Major Facilitator Superfamily                                                                    |
| 1073 | -4.50 | 1.28E-07 | -            | Class II Aldolase and Adducin N-terminal domain protein,hypothetical protein,Ribulose-5-phosphate 4-epimerase and related epimerases and aldolases,methylthioribulose-1-phosphate dehydratase,Class II Aldolase and Adducin N-terminal domain |
| 388  | -4.44 | 2.38E-09 | <i>gadC2</i> | amino acid permease,Extreme acid sensitivity protein,inner membrane transporter                                                                                                                                                               |
| 1389 | -4.42 | 4.00E-06 | <i>pyrP</i>  | uracil permease,Uracil transporter,uracil transporter,uracil-xanthine permease,Permease family                                                                                                                                                |
| 2266 | -4.32 | 4.22E-08 | <i>mtlD</i>  | Mannitol-1-phosphate 5-dehydrogenase                                                                                                                                                                                                          |
| 538  | -4.32 | 3.94E-09 | <i>aspC</i>  | aspartate aminotransferase                                                                                                                                                                                                                    |
| 537  | -4.31 | 4.22E-08 | <i>arcD</i>  | arginine/ornithine APC family amino acid-polyamine-organocation transporter, antiporter                                                                                                                                                       |
| 1471 | -4.24 | 2.16E-06 | -            | integral membrane protein,Predicted integral membrane protein                                                                                                                                                                                 |
| 968  | -4.23 | 8.17E-10 | <i>fabD</i>  | Malonyl CoA-acyl carrier protein transacylase                                                                                                                                                                                                 |
| 472  | -4.23 | 3.90E-10 | <i>galM</i>  | aldose 1-epimerase                                                                                                                                                                                                                            |
| 1716 | -4.23 | 6.91E-10 | <i>argS</i>  | arginyl-tRNA synthetase                                                                                                                                                                                                                       |
| 1872 | -4.21 | 5.70E-08 | -            | hypothetical protein                                                                                                                                                                                                                          |
| 471  | -4.20 | 1.34E-10 | <i>galK</i>  | galactokinase                                                                                                                                                                                                                                 |
| 1404 | -4.17 | 5.15E-07 | -            | ABC transporter substrate binding protein                                                                                                                                                                                                     |
| 2728 | -4.17 | 1.07E-08 | <i>ykoD</i>  | ABC transporter ATP-binding protein,Putative HMP/thiamine import ATP-binding protein YkoD,cobalt transporter ATP-binding subunit,ABC-type Na <sup>+</sup> transport system                                                                    |
| 969  | -4.15 | 1.13E-09 | <i>fabG2</i> | 3-oxoacyl-ACP reductase,3-oxoacyl-[acyl-carrier-protein] reductase FabG                                                                                                                                                                       |
| 1472 | -4.14 | 2.90E-07 | <i>mdxG</i>  | ABC transporter permease,Maltose transport system permease protein malG                                                                                                                                                                       |
| 1530 | -4.09 | 1.79E-04 | -            | prevent-host-death family antitoxin                                                                                                                                                                                                           |
| 1390 | -4.05 | 6.79E-07 | <i>pyrB</i>  | aspartate carbamoyltransferase                                                                                                                                                                                                                |
| 965  | -4.04 | 5.46E-10 | <i>marR1</i> | MarR family transcriptional regulator,Multiple antibiotic resistance protein marR                                                                                                                                                             |
| 1407 | -4.04 | 3.96E-07 | <i>aroE</i>  | shikimate 5-dehydrogenase                                                                                                                                                                                                                     |
| 967  | -4.03 | 6.91E-10 | <i>acpA</i>  | acyl carrier protein,Acyl carrier protein,acyl carrier protein,Acyl carrier protein,acyl carrier protein,Phosphopantetheine attachment site                                                                                                   |
| 3055 | -3.99 | 7.02E-09 | -            | hypothetical protein                                                                                                                                                                                                                          |
| 1487 | -3.98 | 5.16E-10 | <i>ahpF</i>  | peroxiredoxin subunit F,NADH dehydrogenase                                                                                                                                                                                                    |
| 1826 | -3.98 | 1.36E-05 | -            | MarR family transcriptional regulator,homoprotocatechuate degradation operon regulator, HpaR,MarR family                                                                                                                                      |
| 971  | -3.97 | 9.99E-10 | <i>accB</i>  | acetyl-CoA carboxylase biotin carboxyl carrier subunit                                                                                                                                                                                        |



|      |       |          |              |                                                                                                                                                                                                                    |
|------|-------|----------|--------------|--------------------------------------------------------------------------------------------------------------------------------------------------------------------------------------------------------------------|
| 389  | -3.96 | 5.96E-09 | <i>nhaC1</i> | Na <sup>+</sup> /H <sup>+</sup> antiporter,Sodium/proton antiporter,Na <sup>+</sup> /H <sup>+</sup> antiporter NhaC,Na <sup>+</sup> /H <sup>+</sup> antiporter family                                              |
| 970  | -3.96 | 2.37E-09 | <i>fabF</i>  | beta-ketoacyl-acyl-carrier-protein synthase II                                                                                                                                                                     |
| 1388 | -3.95 | 2.13E-05 | <i>pyrR</i>  | pyrimidine operon attenuation protein                                                                                                                                                                              |
| 3056 | -3.93 | 1.12E-07 | -            | hypothetical protein                                                                                                                                                                                               |
| 2854 | -3.91 | 2.65E-08 | <i>ugpA6</i> | carbohydrate ABC superfamily ATP binding cassette transporter, membrane protein transport system, permease component,NifC-like ABC-type porter,Binding-protein-dependent transport system inner membrane component |
| 966  | -3.88 | 5.16E-10 | <i>fabH</i>  | 3-oxoacyl-ACP synthase                                                                                                                                                                                             |
| 972  | -3.86 | 2.88E-09 | <i>fabZ2</i> | (3R)-hydroxymyristoyl-[acyl carrier protein] dehydratase                                                                                                                                                           |
| 1382 | -3.85 | 1.45E-07 | <i>fhs</i>   | formate-tetrahydrofolate ligase                                                                                                                                                                                    |
| 1424 | -3.82 | 3.50E-06 | <i>ybbH2</i> | RpiR family transcriptional regulator,Uncharacterized HTH-type transcriptional regulator ybbH                                                                                                                      |
| 2475 | -3.80 | 6.52E-08 | <i>licB4</i> | PTS system cellobiose-specific transporter subunit IIB,Lichenan-specific phosphotransferase enzyme IIB component                                                                                                   |
| 1391 | -3.80 | 5.65E-07 | <i>pyrC</i>  | Dihydroorotase,Dihydroorotase                                                                                                                                                                                      |
| 930  | -3.79 | 1.15E-07 | <i>fntA</i>  | Beta-lactamase,hypothetical protein,beta-lactamase/D-alanine carboxypeptidase                                                                                                                                      |
| 1622 | -3.76 | 5.71E-07 | <i>aroF</i>  | phospho-2-dehydro-3-deoxyheptonate aldolase                                                                                                                                                                        |
| 1555 | -3.75 | 2.32E-07 | <i>prsA2</i> | foldase protein PrsA                                                                                                                                                                                               |
| 1315 | -3.71 | 8.46E-09 | <i>fabZ1</i> | (3R)-hydroxymyristoyl-[acyl carrier protein] dehydratase                                                                                                                                                           |
| 973  | -3.71 | 1.97E-09 | <i>cfiB1</i> | acetyl-CoA carboxylase biotin carboxylase subunit                                                                                                                                                                  |
| 2856 | -3.70 | 7.14E-09 | <i>lipO2</i> | carbohydrate ABC superfamily ATP binding cassette transporter, binding protein,Lipoprotein lplA,Maltose-binding periplasmic proteins/domains                                                                       |
| 1483 | -3.69 | 1.66E-07 | <i>uxuA</i>  | mannonate dehydratase                                                                                                                                                                                              |
| 1303 | -3.68 | 2.78E-08 | <i>trpS</i>  | tryptophan-tRNA ligase                                                                                                                                                                                             |
| 2855 | -3.67 | 1.27E-08 | <i>ycjP9</i> | carbohydrate ABC superfamily ATP binding cassette transporter, membrane protein                                                                                                                                    |
| 1405 | -3.66 | 5.99E-07 | <i>lsrC1</i> | amino acid or sugar ABC transport system, permease protein                                                                                                                                                         |
| 1741 | -3.60 | 8.33E-09 | <i>feoA</i>  | iron (Fe <sup>3+</sup> ) ABC superfamily ATP binding cassette transporter                                                                                                                                          |
| 2730 | -3.59 | 3.50E-09 | -            | transcriptional regulator,Bacterial regulatory proteins, tetR family                                                                                                                                               |
| 892  | -3.59 | 1.89E-08 | <i>acrR</i>  | TetR/AcrR family transcriptional regulato                                                                                                                                                                          |
| 2727 | -3.58 | 1.85E-06 | -            | conserved hypothetical integral membrane protein                                                                                                                                                                   |
| 1623 | -3.57 | 4.05E-09 | <i>lacM</i>  | Beta-galactosidase small subunit                                                                                                                                                                                   |
| 1406 | -3.57 | 5.77E-08 | <i>cmpD</i>  | ABC transporter ATP-binding protein,Bicarbonate transport ATP-binding protein CmpD                                                                                                                                 |
| 2857 | -3.54 | 8.52E-08 | -            | Predicted integral membrane protein                                                                                                                                                                                |
| 2207 | -3.53 | 3.62E-09 | <i>luxO3</i> | sigma-54 dependent DNA-binding transcriptional regulator,Regulatory protein luxO,anaerobic nitric oxide reductase transcription regulator                                                                          |
| 974  | -3.48 | 2.00E-09 | <i>accD</i>  | Acetyl-coenzyme A carboxylase carboxyl transferase subunit beta                                                                                                                                                    |
| 2332 | -3.48 | 5.79E-07 | <i>feoA</i>  | ferrous iron (Fe <sup>2+</sup> ) uptake protein FeoA,ferrous iron transport protein A,FeoA domain                                                                                                                  |
| 1411 | -3.45 | 4.04E-05 | -            | hypothetical protein                                                                                                                                                                                               |
| 1355 | -3.44 | 2.55E-05 | -            | OsmC-like protein                                                                                                                                                                                                  |
| 2651 | -3.44 | 1.23E-08 | -            | HAD superfamily hydrolase                                                                                                                                                                                          |

|      |       |          |              |                                                                                                                                          |
|------|-------|----------|--------------|------------------------------------------------------------------------------------------------------------------------------------------|
| 1484 | -3.41 | 1.10E-07 | <i>por</i>   | mannitol dehydrogenase protein                                                                                                           |
| 2268 | -3.40 | 2.83E-08 | <i>mtlA1</i> | PTS system mannitol-specific transporter subunit IICBA                                                                                   |
| 2737 | -3.39 | 2.38E-09 | <i>yidK</i>  | Sodium/myo-inositol cotransporter, Uncharacterized symporter yidK                                                                        |
| 1474 | -3.38 | 1.94E-08 | <i>malX</i>  | maltose/maltodextrin ABC superfamily ATP binding cassette transporter, binding protein                                                   |
| 975  | -3.38 | 2.02E-09 | <i>accA</i>  | cetyl-coenzyme A carboxylase carboxyl transferase subunit alpha                                                                          |
| 1393 | -3.38 | 1.32E-08 | <i>carB</i>  | carbamoyl-phosphate synthase large subunit                                                                                               |
| 1392 | -3.37 | 4.04E-07 | <i>carA</i>  | carbamoyl-phosphate synthase small subunit                                                                                               |
| 1408 | -3.36 | 1.70E-08 | <i>msrR</i>  | transcriptional regulator, PSR protein, Regulatory protein msrR                                                                          |
| 2133 | -3.33 | 3.46E-09 | -            | ABC transporter ATP-binding protein/permease, Putative multidrug export ATP-binding/permease protein SAV1866                             |
| 423  | -3.24 | 2.02E-08 | <i>galM2</i> | aldose 1-epimerase                                                                                                                       |
| 1265 | -3.23 | 1.97E-09 | <i>rpsT</i>  | 30S ribosomal protein S20                                                                                                                |
| 2788 | -3.22 | 1.57E-09 | <i>apbE</i>  | thiamine biosynthesis lipoprotein, Thiamine biosynthesis lipoprotein ApbE precursor, thiamine biosynthesis lipoprotein ApbE, ApbE family |
| 2736 | -3.21 | 7.13E-08 | -            | cellobiose phosphotransferase system IIB component                                                                                       |
| 2469 | -3.21 | 1.89E-08 | -            | integral membrane protein, Uncharacterized BCR, YitT family COG1284                                                                      |
| 2652 | -3.21 | 4.49E-09 | <i>manZ5</i> | PTS system mannose/fructose/sorbose-specific IID component                                                                               |
| 2726 | -3.20 | 1.42E-08 | <i>irtA</i>  | ABC transporter ATP-binding protein, Iron import ATP-binding/permease protein IrtA                                                       |
| 1497 | -3.19 | 1.62E-08 | -            | flavin reductase, short chain dehydrogenase                                                                                              |
| 1540 | -3.17 | 2.85E-05 | <i>agaC1</i> | PTS system mannose/fructose/sorbose-specific IIC component                                                                               |
| 2787 | -3.14 | 5.96E-08 | -            | FMN-binding domain-containing protein, Major membrane immunogen, membrane-anchored lipoprotein                                           |
| 2858 | -3.13 | 4.29E-09 | -            | family 20 glycoside hydrolase, N-acetyl-beta-hexosaminidase                                                                              |
| 2653 | -3.12 | 6.85E-09 | <i>manY2</i> | PTS system mannose/fructose/sorbose-specific IIC component                                                                               |
| 2214 | -3.11 | 3.64E-09 | <i>msmK</i>  | ABC transporter ATP-binding protein, sn-glycerol-3-phosphate import ATP-binding protein UgpC                                             |
| 2446 | -3.07 | 2.38E-09 | <i>purR1</i> | LacI family transcriptional regulator, Purine nucleotide synthesis repressor                                                             |
| 440  | -3.06 | 1.77E-06 | -            | hypothetical protein                                                                                                                     |
| 2377 | -3.05 | 1.08E-09 | <i>pepF</i>  | M03 family oligopeptidase F                                                                                                              |
| 1270 | -3.03 | 1.37E-08 | <i>uppP</i>  | undecaprenyl-diphosphatase, Undecaprenyl-diphosphatase                                                                                   |
| 1801 | -3.03 | 1.72E-08 | -            | transcriptional regulator, Uncharacterized protein conserved in bacteria (DUF2087)                                                       |
| 2786 | -3.02 | 9.63E-10 | <i>yjID</i>  | pyridine nucleotide-disulfide family oxidoreductase                                                                                      |
| 1260 | -3.01 | 1.98E-06 | -            | esterase                                                                                                                                 |
| 292  | -3.01 | 3.00E-03 | -            | hypothetical protein                                                                                                                     |
| 1496 | -3.01 | 6.69E-07 | -            | hypothetical protein                                                                                                                     |
| 893  | -3.01 | 8.41E-09 | <i>mioC</i>  | flavodoxin, hypothetical protein                                                                                                         |
| 1740 | -2.99 | 1.68E-06 | <i>feuC2</i> | iron (Fe3+) ABC superfamily ATP binding cassette transporters                                                                            |
| 2739 | -2.99 | 5.11E-08 | <i>idhA2</i> | oxidoreductase family NAD-binding Rossmann fold protein                                                                                  |
| 2222 | -2.99 | 2.52E-09 | <i>metG2</i> | methionyl-tRNA synthetase                                                                                                                |

|      |       |          |              |                                                                                                                                                                                       |
|------|-------|----------|--------------|---------------------------------------------------------------------------------------------------------------------------------------------------------------------------------------|
| 252  | -2.99 | 6.38E-05 | -            | CitMHS family citrate-magnesium (Mg <sup>2+</sup> ):proton (H <sup>+</sup> ) citrate-calcium (Ca <sup>2+</sup> ): proton (H <sup>+</sup> ) symporter                                  |
| 1611 | -2.98 | 1.91E-04 | <i>ycjO2</i> | ABC transporter permease                                                                                                                                                              |
| 2458 | -2.97 | 7.58E-08 | -            | DUF1237 family protein,Uncharacterized conserved protein                                                                                                                              |
| 1283 | -2.97 | 1.26E-02 | -            | glucose uptake protein                                                                                                                                                                |
| 1163 | -2.96 | 3.31E-09 | <i>pflA</i>  | pyruvate formate-lyase activating enzyme                                                                                                                                              |
| 2654 | -2.96 | 4.45E-08 | <i>levE1</i> | PTS system mannose/fructose/sorbose-specific IIB component                                                                                                                            |
| 1500 | -2.96 | 9.76E-08 | <i>dxs</i>   | 1-deoxy-D-xylulose-5-phosphate synthase                                                                                                                                               |
| 2738 | -2.96 | 4.13E-09 | <i>iolE</i>  | inosose dehydratase                                                                                                                                                                   |
| 1620 | -2.96 | 4.97E-07 | <i>aroC</i>  | chorismate synthase                                                                                                                                                                   |
| 2820 | -2.96 | 2.95E-08 | -            | hypothetical protein                                                                                                                                                                  |
| 760  | -2.94 | 3.26E-08 | <i>dltB</i>  | GNAT family acetyltransferase,ribosomal-protein-alanine acetyltransferase                                                                                                             |
| 184  | -2.94 | 2.65E-08 | -            | hypothetical protein                                                                                                                                                                  |
| 1439 | -2.90 | 2.09E-08 | -            | Hypothetical protein ywIG,hypothetical protein,hypothetical protein,Uncharacterized protein conserved in bacteria,conserved hypothetical protein,Protein of unknown function (DUF436) |
| 2482 | -2.90 | 8.46E-09 | <i>msbA</i>  | ABC transporter ATP-binding protein,Lipid A export ATP-binding/permease protein MsbA,cysteine/glutathione ABC transporter membrane/ATP-binding component                              |
| 734  | -2.90 | 1.16E-06 | <i>fruA2</i> | PTS system fructose-specific transporter subunit IIBC                                                                                                                                 |
| 1934 | -2.90 | 2.65E-06 | <i>wcaJ2</i> | glycosyl transferase family protein,rhamnosyltransferase                                                                                                                              |
| 86   | -2.89 | 2.02E-08 | <i>rplC</i>  | LSU ribosomal protein L3P,50S ribosomal protein L3                                                                                                                                    |
| 762  | -2.87 | 1.51E-08 | <i>dltD</i>  | D-alanyl-lipoteichoic acid synthetase                                                                                                                                                 |
| 1357 | -2.86 | 1.06E-04 | -            | transposase                                                                                                                                                                           |
| 761  | -2.86 | 7.68E-07 | <i>dltC</i>  | D-alanine-poly(phosphoribitol) ligase subunit 2                                                                                                                                       |
| 1619 | -2.86 | 1.56E-07 | <i>tyrC</i>  | prephenate dehydrogenase,Arogenate dehydrogenase                                                                                                                                      |
| 2740 | -2.85 | 6.48E-08 | <i>iolG</i>  | oxidoreductase family NAD-binding Rossmann fold protein                                                                                                                               |
| 85   | -2.85 | 4.52E-07 | <i>rpsJ</i>  | 30S ribosomal protein S10                                                                                                                                                             |
| 891  | -2.85 | 9.52E-09 | <i>pepS</i>  | aminopeptidase PepS                                                                                                                                                                   |
| 2039 | -2.84 | 3.16E-09 | <i>rihB</i>  | inosine-uridine preferring nucleoside hydrolase                                                                                                                                       |
| 733  | -2.83 | 2.29E-05 | <i>fruA1</i> | PTS system fructose-specific transporter subunit IIA                                                                                                                                  |
| 1971 | -2.83 | 4.00E-08 | <i>mntH</i>  | metal ion transporter,Probable manganese transport protein MntH                                                                                                                       |
| 34   | -2.83 | 1.95E-05 | <i>ganB</i>  | arabinogalactan endo-beta-galactosidase                                                                                                                                               |
| 2466 | -2.81 | 3.89E-06 | <i>ugpA4</i> | ABC transporter permease                                                                                                                                                              |
| 1482 | -2.81 | 4.41E-06 | -            | M protein trans-acting positive regulator,Mga helix-turn-helix domain                                                                                                                 |
| 1162 | -2.80 | 4.06E-09 | <i>pflB</i>  | formate acetyltransferase                                                                                                                                                             |
| 1438 | -2.80 | 3.31E-08 | <i>hmpT</i>  | Substrate-specific component PdxU2 of predicted pyridoxin-related ECF transporter                                                                                                     |
| 1077 | -2.80 | 1.15E-08 | <i>gmuC4</i> | PTS system lactose/cellobiose-specific transporter subunit IIC                                                                                                                        |
| 915  | -2.79 | 1.18E-08 | <i>tagF</i>  | utative glycosyl/glycerophosphate transferases involved in teichoic acid biosynthesis TagF/TagB/EpsJ/RodC                                                                             |
| 1078 | -2.79 | 1.61E-08 | <i>bglB</i>  | 6-phospho-beta-glucosidase                                                                                                                                                            |
| 2859 | -2.79 | 1.86E-08 | <i>ebgA</i>  | beta-galactosidase subunit alpha                                                                                                                                                      |
| 759  | -2.78 | 4.32E-08 | <i>dltA</i>  | D-alanine-poly(phosphoribitol) ligase subunit 1                                                                                                                                       |

|      |       |          |              |                                                                                                                                                      |
|------|-------|----------|--------------|------------------------------------------------------------------------------------------------------------------------------------------------------|
| 2741 | -2.78 | 2.82E-08 | <i>fucO</i>  | aldehyde-alcohol dehydrogenase                                                                                                                       |
| 2244 | -2.78 | 1.16E-05 | -            | quinolone resistance protein,secreted effector protein PipB                                                                                          |
| 1932 | -2.77 | 2.32E-07 | -            | Oligosaccharide biosynthesis protein Alg14 like                                                                                                      |
| 2330 | -2.77 | 1.60E-04 | -            | hypothetical protein                                                                                                                                 |
| 1437 | -2.77 | 1.28E-08 | <i>thiD2</i> | phosphomethylpyrimidine kinase,Pyridoxine kinase                                                                                                     |
| 1612 | -2.77 | 3.58E-06 | <i>lacE2</i> | lactose ABC superfamily ATP binding cassette transporter                                                                                             |
| 1394 | -2.76 | 4.58E-07 | <i>pyrK</i>  | dihydroorotate dehydrogenase electron transfer subunit                                                                                               |
| 2169 | -2.76 | 1.27E-08 | <i>yumC</i>  | ferredoxin-NADP reductase                                                                                                                            |
| 2040 | -2.75 | 8.93E-09 | -            | integral membrane protein,Protein of unknown function (DUF3816)                                                                                      |
| 1448 | -2.75 | 7.67E-08 | <i>ytgP1</i> | polysaccharide biosynthesis family protein,Probable cell division protein ytgP                                                                       |
| 437  | -2.74 | 5.23E-09 | -            | sensor histidine kinase,sensory histidine kinase DcuS                                                                                                |
| 1599 | -2.73 | 2.24E-07 | -            | glyoxalase family protein,Glyoxalase-like domain                                                                                                     |
| 87   | -2.70 | 1.18E-08 | <i>rplD</i>  | 50S ribosomal protein L4                                                                                                                             |
| 88   | -2.70 | 1.31E-08 | <i>rplW</i>  | 50S ribosomal protein L23                                                                                                                            |
| 2900 | -2.70 | 7.52E-06 | -            | hypothetical protein                                                                                                                                 |
| 2860 | -2.68 | 1.79E-07 | <i>hyl</i>   | hyaluronate lyase                                                                                                                                    |
| 1624 | -2.64 | 7.14E-09 | <i>lacL</i>  | beta-galactosidase large subunit                                                                                                                     |
| 1533 | -2.64 | 1.68E-05 | -            |                                                                                                                                                      |
| 758  | -2.63 | 7.95E-06 | -            | D-Ala-teichoic acid biosynthesis protein.,D-Ala-teichoic acid biosynthesis protein                                                                   |
| 422  | -2.62 | 1.31E-08 | -            | peptide ABC transporter permease/transmembrane protein,FtsX-like permease family                                                                     |
| 3107 | -2.61 | 3.36E-08 | <i>walk2</i> | sensor histidine kinase,sensory histidine kinase DcuS                                                                                                |
| 1261 | -2.60 | 1.01E-05 | -            | lipase/acylhydrolase domain-containing protein                                                                                                       |
| 90   | -2.60 | 2.50E-09 | <i>rpsS</i>  | SSU ribosomal protein S19P,30S ribosomal protein S19,30S ribosomal protein S19,Ribosomal protein S19,ribosomal protein S19,Ribosomal protein S19     |
| 1616 | -2.60 | 2.23E-06 | <i>pheA</i>  | prephenate dehydratase                                                                                                                               |
| 1615 | -2.59 | 4.32E-08 | <i>yehU2</i> | sensor histidine kinase                                                                                                                              |
| 1450 | -2.58 | 4.57E-08 | <i>ygaZ</i>  | putative azaleucine resistance protein AzlC                                                                                                          |
| 89   | -2.57 | 2.38E-09 | <i>rplB</i>  | 50S ribosomal protein L2                                                                                                                             |
| 1541 | -2.57 | 6.38E-05 | <i>gldA1</i> | Glycerol dehydrogenase                                                                                                                               |
| 438  | -2.56 | 2.24E-08 | -            | hypothetical protein                                                                                                                                 |
| 2483 | -2.56 | 9.04E-09 | -            | ABC transporter ATP-binding protein                                                                                                                  |
| 253  | -2.55 | 1.59E-04 | -            | CitMHS family citrate-magnesium (Mg <sup>2+</sup> ):proton (H <sup>+</sup> ) citrate-calcium (Ca <sup>2+</sup> ): proton (H <sup>+</sup> ) symporter |
| 1264 | -2.55 | 4.78E-08 | -            | DNA polymerase III subunit delta                                                                                                                     |
| 2376 | -2.55 | 6.03E-07 | -            | transposase                                                                                                                                          |
| 754  | -2.55 | 2.49E-08 | -            | anaerobic ribonucleoside-triphosphate reductase activating protein                                                                                   |
| 2381 | -2.55 | 3.89E-08 | <i>yfnB2</i> | HAD superfamily hydrolase                                                                                                                            |
| 1410 | -2.55 | 5.96E-08 | <i>topA2</i> | DNA topoisomerase TopA                                                                                                                               |
| 1739 | -2.54 | 4.92E-06 | <i>fhuB</i>  | ferrichrome transport system permease FhuB                                                                                                           |
| 939  | -2.54 | 2.53E-08 | -            | Protein of unknown function (DUF1189)                                                                                                                |
| 2474 | -2.53 | 8.49E-09 | <i>licR5</i> | BglG family transcriptional antiterminator                                                                                                           |
| 2774 | -2.53 | 2.88E-09 | <i>rpoC</i>  | DNA-directed RNA polymerase                                                                                                                          |

|      |       |          |              |                                                                                                                                                                                                                       |
|------|-------|----------|--------------|-----------------------------------------------------------------------------------------------------------------------------------------------------------------------------------------------------------------------|
| 2473 | -2.53 | 8.20E-07 | <i>lacF4</i> | PTS system cellobiose-specific IIA component                                                                                                                                                                          |
| 8    | -2.52 | 1.73E-08 | <i>ssbI</i>  | single-stranded DNA-binding protein, Helix-destabilizing protein                                                                                                                                                      |
| 1238 | -2.52 | 9.72E-08 | <i>xylH</i>  | amino acid or sugar ABC transport system, permease protein                                                                                                                                                            |
| 1358 | -2.51 | 4.56E-09 | <i>ponA1</i> | penicillin-binding protein 1A                                                                                                                                                                                         |
| 1039 | -2.50 | 4.87E-04 | <i>ulaG</i>  | L-ascorbate 6-phosphate lactonase                                                                                                                                                                                     |
| 1627 | -2.50 | 4.12E-07 | <i>aes2</i>  | Acetyl esterase                                                                                                                                                                                                       |
| 84   | -2.50 | 2.91E-09 | <i>tufA</i>  | protein-synthesizing GTPase, Elongation factor Tu                                                                                                                                                                     |
| 7    | -2.49 | 3.84E-08 | <i>rpsF</i>  | 30S ribosomal protein S6                                                                                                                                                                                              |
| 337  | -2.49 | 1.67E-05 | <i>ulaA1</i> | PTS system ascorbate-specific transporter subunit IIC                                                                                                                                                                 |
| 1395 | -2.49 | 7.57E-07 | <i>pyrDB</i> | Dihydroorotate dehydrogenase 1B                                                                                                                                                                                       |
| 581  | -2.49 | 1.46E-08 | <i>prsA1</i> | putative foldase protein PrsA                                                                                                                                                                                         |
| 1447 | -2.49 | 1.22E-07 | <i>degV</i>  | EDD domain-containing protein, DegV family                                                                                                                                                                            |
| 1614 | -2.48 | 3.04E-07 | <i>ypdC1</i> | Two-component response regulator TrxR                                                                                                                                                                                 |
| 2451 | -2.48 | 8.50E-06 | -            | sugar isomerase, L-xylulose 5-phosphate 3-epimerase                                                                                                                                                                   |
| 755  | -2.47 | 2.32E-09 | <i>nrdD</i>  | anaerobic ribonucleoside triphosphate reductase                                                                                                                                                                       |
| 1621 | -2.47 | 4.57E-07 | <i>aroB</i>  | 3-dehydroquinate synthase                                                                                                                                                                                             |
| 2457 | -2.47 | 3.57E-08 | <i>mngB</i>  | glycosyl hydrolase family 38 protein                                                                                                                                                                                  |
| 916  | -2.47 | 3.67E-08 | <i>rfbX1</i> | Membrane protein involved in the export of O-antigen and teichoic acid                                                                                                                                                |
| 2819 | -2.46 | 2.11E-08 | <i>trmE</i>  | tRNA modification GTP-binding protein TrmE                                                                                                                                                                            |
| 2792 | -2.46 | 1.94E-08 | <i>yhbU2</i> | peptidase U32 family, Uncharacterized protease yhbU precursor                                                                                                                                                         |
| 1314 | -2.46 | 2.28E-08 | <i>fabI</i>  | Enoyl-[acyl-carrier-protein] reductase                                                                                                                                                                                |
| 235  | -2.46 | 1.24E-03 | -            | TRAP dicarboxylate transporter subunit DctQ, 2,3-diketo-L-gulonate TRAP transporter small permease protein YiaM                                                                                                       |
| 92   | -2.45 | 4.68E-09 | <i>rpsC</i>  | 30S ribosomal protein S3                                                                                                                                                                                              |
| 2331 | -2.45 | 7.54E-08 | <i>feoB</i>  | ferrous iron transport protein B, Ferrous iron transport protein B, ferrous iron transport protein B, Fe <sup>2+</sup> transport system protein B, ferrous iron transport protein B, Ferrous iron transport protein B |
| 1804 | -2.43 | 8.53E-03 | -            | hypothetical protein                                                                                                                                                                                                  |
| 2472 | -2.43 | 2.36E-07 | -            | hypothetical protein                                                                                                                                                                                                  |
| 1711 | -2.43 | 5.59E-09 | <i>rpsB</i>  | 30S ribosomal protein S2                                                                                                                                                                                              |
| 735  | -2.43 | 5.28E-07 | <i>kbaY</i>  | fructose-bisphosphate aldolase                                                                                                                                                                                        |
| 1537 | -2.43 | 1.33E-04 | -            | hypothetical protein                                                                                                                                                                                                  |
| 1927 | -2.43 | 1.56E-06 | -            | hypothetical protein                                                                                                                                                                                                  |
| 1618 | -2.42 | 1.04E-07 | <i>aroA</i>  | 3-phosphoshikimate 1-carboxyvinyltransferase                                                                                                                                                                          |
| 3108 | -2.42 | 1.16E-07 | <i>walR</i>  | Response regulators consisting of a CheY-like receiver domain and a winged-helix DNA-binding domain                                                                                                                   |
| 1954 | -2.42 | 4.58E-06 | -            | transposase                                                                                                                                                                                                           |
| 2465 | -2.41 | 2.92E-06 | <i>ycjP6</i> | ABC transporter permease, Inner membrane ABC transporter permease protein ycjP                                                                                                                                        |
| 2789 | -2.41 | 1.74E-07 | -            | prenyltransferase, UbiA family, 1,4-dihydroxy-2-naphthoate octaprenyltransferase                                                                                                                                      |
| 911  | -2.41 | 4.68E-09 | <i>wcaJ1</i> | Undecaprenyl-phosphate galactosephosphotransferase, Putative colanic biosynthesis UDP-glucose lipid carrier transferase                                                                                               |
| 2447 | -2.41 | 3.95E-06 | <i>uxaB</i>  | mannitol dehydrogenase protein, Altronate oxidoreductase                                                                                                                                                              |

|      |       |          |              |                                                                                                                       |
|------|-------|----------|--------------|-----------------------------------------------------------------------------------------------------------------------|
| 922  | -2.40 | 1.60E-08 | -            | O-Antigen ligase                                                                                                      |
| 205  | -2.40 | 3.25E-09 | <i>ddl</i>   | D-alanine-D-alanine ligase                                                                                            |
| 2885 | -2.40 | 1.66E-05 | -            | hypothetical protein                                                                                                  |
| 300  | -2.39 | 9.95E-08 | <i>sstT</i>  | transporter, dicarboxylate/amino acid:cation symporter family protein,Na(+)/serine-threonine symporter                |
| 9    | -2.39 | 2.09E-08 | <i>rpsR</i>  | SSU ribosomal protein S18P                                                                                            |
| 1793 | -2.38 | 2.75E-07 | -            | hypothetical protein                                                                                                  |
| 2824 | -2.38 | 1.49E-07 | <i>rpmH</i>  | LSU ribosomal protein L34P                                                                                            |
| 79   | -2.37 | 8.33E-09 | <i>hinI</i>  | resolvase family site-specific recombinase,DNA-invertase hin,multiple promoter invertase,Resolvase, N terminal domain |
| 91   | -2.37 | 1.27E-08 | <i>rplV</i>  | 50S ribosomal protein L22                                                                                             |
| 2818 | -2.37 | 1.38E-09 | <i>gidA2</i> | tRNA uridine 5-carboxymethylaminomethyl modification protein GidA                                                     |
| 421  | -2.37 | 1.07E-06 | <i>macB2</i> | ABC transporter ATP-binding protein,Macrolide export ATP-binding/permease protein MacB                                |
| 299  | -2.37 | 1.58E-06 | -            | lipoprotein                                                                                                           |
| 1656 | -2.36 | 1.05E-08 | <i>porA</i>  | pyruvate flavodoxin oxidoreductase subunit alpha                                                                      |
| 1675 | -2.36 | 2.59E-05 | -            | transposase                                                                                                           |
| 1534 | -2.34 | 3.39E-05 | <i>uxuA2</i> | mannonate dehydratase                                                                                                 |
| 2344 | -2.34 | 2.08E-08 | <i>rplJ</i>  | 50S ribosomal protein L10                                                                                             |
| 1906 | -2.34 | 2.00E-06 | -            | hypothetical protein                                                                                                  |
| 439  | -2.34 | 1.23E-07 | <i>agrB</i>  | accessory regulator agrBfs protein                                                                                    |
| 1449 | -2.34 | 1.35E-06 | -            | branched-chain amino acid transport protein,Predicted membrane protein                                                |
| 1290 | -2.32 | 4.04E-07 | -            | hypothetical protein                                                                                                  |
| 2343 | -2.31 | 5.36E-08 | <i>rplL</i>  | 50S ribosomal protein L7/L12                                                                                          |
| 83   | -2.31 | 1.86E-08 | <i>fusA</i>  | translation elongation factor G                                                                                       |
| 2408 | -2.30 | 2.38E-09 | -            | adenine-specific methyltransferase                                                                                    |
| 109  | -2.29 | 2.66E-09 | <i>rpmJ</i>  | LSU ribosomal protein L36P,Ribosomal protein II,50S ribosomal protein L36,ribosomal protein L36,Ribosomal protein L36 |
| 1041 | -2.29 | 1.29E-05 | <i>ulaA2</i> | PTS system ascorbate-specific transporter subunit IIC                                                                 |
| 1033 | -2.28 | 1.17E-05 | <i>gmuC3</i> | PTS system transporter subunit IIC                                                                                    |
| 335  | -2.28 | 2.23E-06 | <i>ulaC1</i> | PTS system ascorbate-specific transporter subunit IIA                                                                 |
| 625  | -2.28 | 1.94E-06 | -            | Mobile element protein,Transposase and inactivated derivatives                                                        |
| 560  | -2.28 | 1.54E-09 | -            | FeS assembly protein SufB,hypothetical protein                                                                        |
| 107  | -2.28 | 5.67E-09 | <i>adk</i>   | adenylate kinase                                                                                                      |
| 557  | -2.28 | 8.46E-09 | <i>sufD</i>  | FeS assembly protein SufD,hypothetical protein                                                                        |
| 2450 | -2.28 | 3.87E-06 | <i>rhgT</i>  | GDSL-like Lipase/Acylhydrolase                                                                                        |
| 120  | -2.27 | 7.92E-08 | <i>rpmB</i>  | 50S ribosomal protein L28                                                                                             |
| 1613 | -2.25 | 1.46E-06 | -            | response regulator receiver domain-containing protein                                                                 |
| 913  | -2.25 | 2.39E-08 | <i>hyaD1</i> | glycosyltransferase,Hyaluronan synthase                                                                               |
| 81   | -2.25 | 5.18E-09 | <i>rpsL</i>  | 30S ribosomal protein S12                                                                                             |
| 2407 | -2.25 | 9.75E-10 | <i>ackA</i>  | acetate kinase                                                                                                        |
| 991  | -2.25 | 2.25E-07 | <i>ybbH1</i> | bifunctional RpiR family transcriptional regulator/sugar isomerase                                                    |
| 229  | -2.25 | 1.97E-08 | <i>tgt</i>   | tRNA-guanine transglycosylase                                                                                         |

|      |       |          |                  |                                                                                                                                                                                                                                                                       |
|------|-------|----------|------------------|-----------------------------------------------------------------------------------------------------------------------------------------------------------------------------------------------------------------------------------------------------------------------|
| 914  | -2.25 | 7.70E-08 | <i>hyaD2</i>     | Glycosyltransferases involved in cell wall biogenesis                                                                                                                                                                                                                 |
| 2    | -2.25 | 8.46E-09 | <i>dnaB1</i>     | DNA polymerase III subunit beta                                                                                                                                                                                                                                       |
| 2744 | -2.25 | 1.69E-08 | <i>iolB</i>      | 5-deoxy-glucuronate isomerase                                                                                                                                                                                                                                         |
| 2861 | -2.25 | 2.82E-06 | -                | PEP phosphonomutase family protein                                                                                                                                                                                                                                    |
| 631  | -2.25 | 5.19E-05 | -                | transposase                                                                                                                                                                                                                                                           |
| 234  | -2.25 | 6.78E-05 | -                | TRAP dicarboxylate transporter subunit DctP                                                                                                                                                                                                                           |
| 644  | -2.24 | 2.23E-08 | <i>rbsR2</i>     | LacI family transcriptional regulator,Ribose operon repressor                                                                                                                                                                                                         |
| 1617 | -2.24 | 2.47E-05 | <i>aroK</i>      | shikimate kinase                                                                                                                                                                                                                                                      |
| 2353 | -2.23 | 2.29E-07 | <i>secG</i>      | Preprotein translocase subunit SecE                                                                                                                                                                                                                                   |
| 1477 | -2.23 | 1.02E-06 | -                | MerR family transcriptional regulator,Glyoxalase-like domain                                                                                                                                                                                                          |
| 420  | -2.22 | 3.47E-06 | -                | conserved hypothetical protein TIGR01655                                                                                                                                                                                                                              |
| 1443 | -2.22 | 6.36E-05 | <i>aacA-aphD</i> | 6'-aminoglycoside N-acetyltransferase,Predicted phosphotransferase related to Ser/Thr protein kinases                                                                                                                                                                 |
| 1146 | -2.22 | 1.00E-05 | <i>folT1</i>     | membrane protein,Folate ECF transporter S component FolT                                                                                                                                                                                                              |
| 1210 | -2.21 | 3.38E-04 | <i>yesO2</i>     | ABC superfamily ATP binding cassette transporter                                                                                                                                                                                                                      |
| 339  | -2.21 | 5.87E-05 | <i>fbal</i>      | Fructose-bisphosphate aldolase                                                                                                                                                                                                                                        |
| 108  | -2.21 | 1.01E-08 | <i>infA</i>      | initiation factor IF-1                                                                                                                                                                                                                                                |
| 1905 | -2.21 | 1.18E-06 | -                | hypothetical protein                                                                                                                                                                                                                                                  |
| 1561 | -2.21 | 9.35E-04 | <i>srlA</i>      | PTS system glucitol/sorbitol-specific EIIC component                                                                                                                                                                                                                  |
| 96   | -2.21 | 2.37E-09 | <i>rplN</i>      | 50S ribosomal protein L14                                                                                                                                                                                                                                             |
| 93   | -2.20 | 4.68E-09 | <i>rplP</i>      | LSU ribosomal protein L16P                                                                                                                                                                                                                                            |
| 2771 | -2.19 | 1.02E-03 | -                | extracellular solute-binding protein,glycerol-3-phosphate transporter periplasmic binding protein,Maltose-binding periplasmic proteins/domains,carbohydrate ABC transporter substrate-binding protein, CPR_0540 family,Bacterial extracellular solute-binding protein |
| 2775 | -2.18 | 9.75E-10 | <i>rpoB</i>      | DNA-directed RNA polymerase subunit beta                                                                                                                                                                                                                              |
| 558  | -2.18 | 4.65E-09 | <i>csd</i>       | cysteine desulfurase                                                                                                                                                                                                                                                  |
| 3105 | -2.18 | 2.12E-07 | <i>vanH2</i>     | oxidoreductase, aldo/keto reductase family protein                                                                                                                                                                                                                    |
| 94   | -2.18 | 2.46E-08 | <i>rpmC</i>      | LSU ribosomal protein L29P                                                                                                                                                                                                                                            |
| 559  | -2.18 | 7.79E-09 | <i>nifU</i>      | NifU family SUF system FeS assembly protein                                                                                                                                                                                                                           |
| 1532 | -2.18 | 2.38E-06 | -                | hypothetical protein                                                                                                                                                                                                                                                  |
| 1592 | -2.18 | 5.64E-09 | <i>murC</i>      | UDP-N-acetylmuramate--L-alanine ligase                                                                                                                                                                                                                                |
| 110  | -2.18 | 4.29E-09 | <i>rpsM</i>      | 30S ribosomal protein S13,BS14                                                                                                                                                                                                                                        |
| 1359 | -2.17 | 1.03E-07 | <i>recU</i>      | recombination protein U,Holliday junction resolvase recU                                                                                                                                                                                                              |
| 2781 | -2.17 | 1.07E-08 | -                | cell wall surface adhesion protein,choice-of-anchor A domain                                                                                                                                                                                                          |
| 1    | -2.17 | 1.03E-08 | <i>dnaA1</i>     | chromosomal replication initiation protein, DnaA                                                                                                                                                                                                                      |
| 97   | -2.17 | 4.81E-09 | <i>rplX</i>      | 50S ribosomal protein L24                                                                                                                                                                                                                                             |
| 1933 | -2.17 | 1.71E-07 | <i>ugd</i>       | UDP-glucose 6-dehydrogenase                                                                                                                                                                                                                                           |
| 2196 | -2.17 | 1.07E-08 | -                | C4-dicarboxylate anaerobic carrier                                                                                                                                                                                                                                    |
| 232  | -2.17 | 8.45E-05 | <i>yesR</i>      | Glycosyl Hydrolase Family 88,Unsaturated rhamnogalacturonyl hydrolase YesR                                                                                                                                                                                            |
| 1539 | -2.17 | 1.80E-04 | <i>manZ2</i>     | PTS system mannose-specific EIID component                                                                                                                                                                                                                            |
| 2448 | -2.16 | 4.23E-06 | <i>garD</i>      | altronate hydrolase,D-galactarate dehydratase                                                                                                                                                                                                                         |
| 1538 | -2.16 | 3.44E-04 | <i>sorB</i>      | Sorbose-specific phosphotransferase enzyme IIB component                                                                                                                                                                                                              |

|      |       |          |               |                                                                                                                         |
|------|-------|----------|---------------|-------------------------------------------------------------------------------------------------------------------------|
| 1710 | -2.16 | 1.73E-09 | <i>tsf</i>    | elongation factor EF1B                                                                                                  |
| 1931 | -2.16 | 9.49E-06 | -             | Glycosyltransferase family 28 C-terminal domain                                                                         |
| 2742 | -2.15 | 5.47E-07 | <i>iolaA2</i> | methylmalonate-semialdehyde dehydrogenase                                                                               |
| 2754 | -2.15 | 3.23E-03 | -             | Transposase                                                                                                             |
| 82   | -2.14 | 2.92E-07 | <i>rpsG</i>   | SSU ribosomal protein S7P                                                                                               |
| 336  | -2.14 | 8.56E-04 | <i>ulaB1</i>  | PTS system ascorbate-specific transporter subunits IICB                                                                 |
| 98   | -2.14 | 6.31E-09 | <i>rplE</i>   | LSU ribosomal protein L5P                                                                                               |
| 1262 | -2.14 | 6.75E-07 | -             | ComE operon protein 2,tRNA-specific adenosine deaminase,Pyrimidine deaminase                                            |
| 2118 | -2.14 | 2.12E-06 | <i>ugl2</i>   | glycosyl hydrolase family protein                                                                                       |
| 1563 | -2.14 | 1.56E-05 | <i>licR3</i>  | PRD domain-containing protein,Probable licABCH operon regulator                                                         |
| 1930 | -2.13 | 8.63E-06 | -             | glycosyl transferase family protein,Glycogen synthase                                                                   |
| 646  | -2.12 | 2.91E-08 | -             | hypothetical protein                                                                                                    |
| 2655 | -2.12 | 1.86E-08 | <i>manX6</i>  | PTS system mannose-specific transporter subunits IIAB                                                                   |
| 1929 | -2.12 | 8.91E-07 | <i>kfoC3</i>  | glycosyl transferase family protein,rhamnosyltransferase                                                                |
| 374  | -2.12 | 1.86E-06 | <i>dhaM</i>   | PTS system glycerone kinase transporter subunit IIA                                                                     |
| 2791 | -2.11 | 2.09E-08 | <i>yhbU1</i>  | U32 family peptidase,Uncharacterized protease yhbU precursor                                                            |
| 732  | -2.11 | 1.50E-08 | <i>rpmE2</i>  | 50S ribosomal protein L31                                                                                               |
| 556  | -2.10 | 4.78E-07 | <i>sufC</i>   | ABC superfamily ATP binding cassette transporter                                                                        |
| 1803 | -2.10 | 5.19E-04 | -             | hypothetical protein                                                                                                    |
| 1727 | -2.10 | 7.67E-08 | <i>degA2</i>  | LacI family transcriptional regulator,Degradation activator                                                             |
| 1820 | -2.09 | 1.32E-04 | <i>crr1</i>   | Glucose-specific phosphotransferase enzyme IIA component,PTS system                                                     |
| 912  | -2.08 | 2.18E-08 | <i>pgaC2</i>  | glycosyl transferase family protein,rhamnosyltransferase                                                                |
| 1003 | -2.08 | 4.98E-07 | <i>rpmF1</i>  | LSU ribosomal protein L32P                                                                                              |
| 2630 | -2.08 | 6.93E-06 | <i>ywnA</i>   | Rrf2 family protein,Putative HTH-type transcriptional regulator ywnA                                                    |
| 95   | -2.08 | 1.07E-08 | <i>rpsQ</i>   | 30S ribosomal protein S17,BS16                                                                                          |
| 1990 | -2.08 | 7.60E-07 | -             | Mobile element protein,Transposase and inactivated derivatives                                                          |
| 111  | -2.08 | 4.76E-08 | <i>rpsK</i>   | SSU ribosomal protein S11P                                                                                              |
| 375  | -2.08 | 1.63E-06 | <i>dhaK</i>   | dihydroxyacetone kinase subunit DhaK                                                                                    |
| 2117 | -2.08 | 2.15E-05 | -             | Uncharacterized protein conserved in bacteria                                                                           |
| 2468 | -2.08 | 7.79E-09 | <i>ytgP2</i>  | polysaccharide biosynthesis family protein,Probable cell division protein ytgP                                          |
| 2471 | -2.07 | 2.02E-08 | <i>gmuC7</i>  | PTS system cellobiose-specific transporter subunit IIC                                                                  |
| 1026 | -2.07 | 1.79E-03 | -             | BglG family transcriptional antiterminator                                                                              |
| 1263 | -2.07 | 1.71E-06 | -             | DNA internalization-related competence protein ComEC/Rec2                                                               |
| 106  | -2.06 | 1.66E-09 | <i>secY</i>   | preprotein translocase subunit SecY                                                                                     |
| 1040 | -2.06 | 1.69E-03 | <i>cmtB</i>   | PTS system ascorbate-specific transporter subunit IIA                                                                   |
| 1928 | -2.06 | 4.80E-07 | <i>cysE1</i>  | Serine O-acetyltransferase                                                                                              |
| 534  | -2.06 | 4.96E-07 | -             | MFS family major facilitator transporter,enterobactin exporter EntS,H+ Antiporter protein,Major Facilitator Superfamily |
| 1459 | -2.06 | 9.55E-04 | <i>nupC1</i>  | Na dependent nucleoside transporter, NupC family                                                                        |
| 1034 | -2.05 | 2.28E-05 | <i>dgk</i>    | diacylglycerol kinase                                                                                                   |



|      |       |          |                                                      |                                                                                  |
|------|-------|----------|------------------------------------------------------|----------------------------------------------------------------------------------|
| 1499 | -2.05 | 2.20E-05 | -                                                    | ASCH protein,ASCH domain                                                         |
| 1044 | -2.05 | 2.13E-05 | <i>sgbU</i>                                          | hexulose-6-phosphate isomerase                                                   |
| 102  | -2.05 | 3.32E-09 | <i>rplR</i>                                          | 50S ribosomal protein L18                                                        |
| 1743 | -2.05 | 4.80E-07 | <i>rpmGA</i>                                         | LSU ribosomal protein L33P                                                       |
| 767  | -2.05 | 1.93E-07 | -                                                    | sensor histidine kinase                                                          |
| 1878 | -2.04 | 4.10E-07 | -                                                    | hypothetical protein                                                             |
| 99   | -2.04 | 9.61E-09 | <i>rpsZ</i>                                          | 30S ribosomal protein S14 type Z,BS21                                            |
| 112  | -2.04 | 6.59E-09 | <i>rpoA</i>                                          | DNA-directed RNA polymerase subunit alpha                                        |
| 2391 | -2.04 | 5.44E-08 | <i>hisS</i>                                          | histidyl-tRNA synthetase                                                         |
| 3104 | -2.03 | 1.80E-07 | <i>vanB2</i>                                         | D-alanine-D-lactate ligase,Vancomycin/teicoplanin A-type resistance protein VanA |
| 1415 | -2.03 | 1.83E-05 | <i>chbR</i>                                          | AraC family transcriptional regulator,Chb operon repressor                       |
| 113  | -2.03 | 4.05E-08 | <i>rplQ</i>                                          | 50S ribosomal protein L17,BL21                                                   |
| 1376 | -2.03 | 2.25E-08 | <i>alaS</i>                                          | alanyl-tRNA synthetase                                                           |
| 645  | -2.02 | 8.82E-09 | <i>gmuD2</i>                                         | putative 6-phospho-beta-glucosidase                                              |
| 2656 | -2.02 | 1.12E-08 | <i>frlB2</i>                                         | sugar isomerase,Fructosamine deglycase frlB                                      |
| 3024 | -2.02 | 5.19E-03 | <i>cca2</i>                                          | CCA-adding enzyme                                                                |
| 2354 | -2.02 | 2.66E-05 | <i>rpmG2</i>                                         | LSU ribosomal protein L33P                                                       |
| 1105 | -2.02 | 8.57E-09 | -                                                    | hypothetical protein                                                             |
| 105  | -2.01 | 2.66E-09 | <i>rplO</i>                                          | LSU ribosomal protein L15P                                                       |
| 268  | -2.01 | 6.59E-09 | <i>pepA</i>                                          | glutamyl aminopeptidase,Glutamyl aminopeptidase,exoaminopeptidase                |
| 1106 | -2.00 | 1.56E-07 | <i>yitL</i>                                          | S1 domain RNA-binding protein,Conserved virulence factor B                       |
| 529  | -2.00 | 5.91E-09 | <i>pepO</i>                                          | Peptidase family M13,Neutral endopeptidase                                       |
| 1821 | -2.00 | 3.49E-06 | <i>sacX</i>                                          | PTS system trehalose(maltose)-specific transporter subunits IIBC                 |
| 376  | -1.98 | 4.37E-06 | <i>dhaL</i>                                          | dihydroxyacetone kinase DhaL subunit                                             |
| 104  | -1.97 | 3.86E-08 | <i>rpmD</i>                                          | 50S ribosomal protein L30                                                        |
| 338  | -1.97 | 4.17E-04 | <i>inference=ab initio prediction:Pro digal:2.60</i> | hypothetical protein                                                             |
| 1536 | -1.97 | 4.79E-04 | <i>inference=ab initio prediction:Pro digal:2.60</i> | hypothetical protein                                                             |
| 2543 | -1.97 | 2.66E-08 | <i>hslO</i>                                          | chaperonin HslO,Heat shock protein 33 homolog                                    |
| 206  | -1.96 | 3.48E-08 | <i>murF</i>                                          | UDP-N-acetylmuramoyl-tripeptide-D-alanyl-D- alanine ligase                       |
| 1825 | -1.96 | 7.50E-06 | -                                                    | ISEnf3, transposase                                                              |
| 3068 | -1.96 | 2.54E-05 | <i>repB2</i>                                         | plasmid replication initiation protein                                           |
| 1625 | -1.96 | 4.43E-09 | <i>galA2</i>                                         | alpha-galactosidase                                                              |
| 2542 | -1.95 | 7.02E-09 | <i>dus</i>                                           | tRNA-dihydrouridine synthase                                                     |

|      |       |          |              |                                                                                                                              |
|------|-------|----------|--------------|------------------------------------------------------------------------------------------------------------------------------|
| 2140 | -1.95 | 7.95E-09 | <i>valS</i>  | valyl-tRNA synthetase                                                                                                        |
| 2745 | -1.95 | 1.81E-07 | <i>iolD</i>  | acetolactate synthase                                                                                                        |
| 1428 | -1.94 | 6.97E-04 | <i>lolD2</i> | ABC transporter ATP-binding protein                                                                                          |
| 1757 | -1.94 | 1.22E-04 | -            | hypothetical protein                                                                                                         |
| 2075 | -1.94 | 9.61E-09 | <i>traL</i>  | putative type IV conjugative transfer system protein TraL                                                                    |
| 1138 | -1.93 | 5.28E-08 | -            | dihydrofolate reductase                                                                                                      |
| 1494 | -1.93 | 2.56E-08 | <i>ftsW2</i> | FtsW/RodA/SpoVE family cell cycle protein                                                                                    |
| 3054 | -1.93 | 9.59E-06 | <i>bin33</i> | resolvase,Putative transposon Tn552 DNA-invertase bin3                                                                       |
| 161  | -1.93 | 1.29E-07 | <i>nirC</i>  | FNT family formate-nitrite transporter                                                                                       |
| 100  | -1.92 | 1.72E-08 | <i>rpsH</i>  | SSU ribosomal protein S8P                                                                                                    |
| 923  | -1.92 | 1.54E-08 | <i>galE</i>  | UDP-glucose 4-epimerase                                                                                                      |
| 2452 | -1.92 | 1.98E-06 | -            | Putative multidrug export ATP-binding/permease protein SAV1866                                                               |
| 2010 | -1.92 | 1.30E-08 | <i>licB3</i> | PTS system cellobiose-specific transporter subunit IIB                                                                       |
| 103  | -1.92 | 4.29E-09 | <i>rpsE</i>  | SSU ribosomal protein S5P                                                                                                    |
| 1535 | -1.91 | 5.68E-04 | <i>manX3</i> | PTS system mannose-specific transporter subunits IIAB                                                                        |
| 2772 | -1.91 | 2.03E-04 | -            | alpha amylase,Sucrose phosphorylase                                                                                          |
| 909  | -1.91 | 2.81E-08 | <i>kfoC2</i> | glycosyl transferase family protein,Chondroitin polymerase                                                                   |
| 1775 | -1.90 | 6.91E-07 | -            | HAD superfamily hydrolase,sugar phosphate phosphatase                                                                        |
| 46   | -1.90 | 5.48E-07 | -            | Protein of unknown function (DUF3644)                                                                                        |
| 1234 | -1.90 | 2.19E-08 | <i>yehU1</i> | Probable sensor-like histidine kinase YehU                                                                                   |
| 2223 | -1.89 | 1.18E-04 | -            | hypothetical protein                                                                                                         |
| 1423 | -1.88 | 8.60E-04 | -            | RpiR family transcriptional regulator,Helix-turn-helix domain                                                                |
| 1136 | -1.88 | 4.19E-07 | <i>yjjK1</i> | ABC transporter ATP-binding protein                                                                                          |
| 712  | -1.88 | 5.18E-09 | <i>luxO1</i> | transcriptional antiterminator,Regulatory protein luxO                                                                       |
| 1090 | -1.87 | 1.62E-08 | <i>pksG</i>  | hydroxymethylglutaryl-CoA synthase,Polyketide biosynthesis 3-hydroxy-3-methylglutaryl-ACP synthase pksG                      |
| 2622 | -1.87 | 7.14E-09 | -            | mannosyl-glycoprotein endo-beta-N-acetylglucosaminidase                                                                      |
| 906  | -1.86 | 7.13E-08 | -            | ABC-2 type transporter                                                                                                       |
| 2234 | -1.85 | 1.17E-07 | <i>rlmN</i>  | ribosomal RNA large subunit methyltransferase N                                                                              |
| 1137 | -1.85 | 2.04E-06 | <i>thyB</i>  | thymidylate synthase                                                                                                         |
| 2121 | -1.85 | 9.42E-04 | -            | Bacterial extracellular solute-binding protein,Maltose-binding periplasmic proteins/domains                                  |
| 2779 | -1.85 | 4.48E-08 | <i>birA</i>  | bifunctional biotin--[acetyl-CoA-carboxylase] ligase/biotin operon transcriptional regulator                                 |
| 1926 | -1.84 | 1.10E-05 | -            | polysaccharide biosynthesis protein CpsM,Mannosyltransferase OCH1 and related enzymes                                        |
| 1865 | -1.84 | 2.08E-06 | -            | putative DNA-binding protein                                                                                                 |
| 1728 | -1.84 | 5.75E-08 | -            | galactose-1-phosphate uridylyltransferase                                                                                    |
| 2209 | -1.84 | 1.34E-07 | <i>yhel2</i> | ABC transporter ATP-binding protein/permease,Probable multidrug resistance ABC transporter ATP-binding/permease protein Yhel |
| 344  | -1.84 | 3.13E-08 | -            | B3/4 domain-containing protein,phenylalanine-tRNA ligase                                                                     |
| 2755 | -1.84 | 2.99E-05 | -            | Transposase IS116/IS110/IS902 family                                                                                         |
| 2701 | -1.83 | 3.26E-06 | -            | hypothetical protein                                                                                                         |
| 1686 | -1.83 | 6.83E-07 | <i>proX1</i> | YbaK/prolyl-tRNA synthetase-associated domain protein                                                                        |

|      |       |          |              |                                                                                                           |
|------|-------|----------|--------------|-----------------------------------------------------------------------------------------------------------|
| 2910 | -1.83 | 1.71E-08 | <i>gmuC8</i> | PTS system oligo-beta-mannoside-specific EIIC component                                                   |
| 1213 | -1.83 | 2.31E-04 | -            | YkoY family integral membrane protein                                                                     |
| 3025 | -1.83 | 1.11E-03 | -            | hypothetical protein                                                                                      |
| 2390 | -1.82 | 4.90E-08 | <i>aspS</i>  | aspartyl-tRNA synthetase                                                                                  |
| 1214 | -1.82 | 4.75E-05 | <i>idhA1</i> | putative oxidoreductase                                                                                   |
| 1560 | -1.81 | 4.75E-05 | <i>srlE</i>  | PTS system glucitol/sorbitol-specific transporter subunit IIBC                                            |
| 1087 | -1.81 | 1.99E-08 | -            | calcium-translocating P-type ATPase                                                                       |
| 1729 | -1.81 | 2.81E-08 | <i>galE3</i> | UDP-glucose 4-epimerase                                                                                   |
| 1943 | -1.81 | 2.14E-07 | <i>glyQ</i>  | glycyl-tRNA synthetase subunit alpha                                                                      |
| 1637 | -1.81 | 3.68E-07 | <i>clcA1</i> | voltage gated cchloride transporter, chloride channel family protein,H(+)/Cl(-) exchange transporter ClcA |
| 3106 | -1.81 | 3.90E-06 | -            | Mobile element protein,Transposase                                                                        |
| 101  | -1.81 | 1.94E-08 | <i>rplF</i>  | 50S ribosomal protein L6,BL10                                                                             |
| 2757 | -1.80 | 2.39E-08 | <i>rpsI2</i> | 30S ribosomal protein S9                                                                                  |
| 505  | -1.80 | 1.12E-01 | -            | hypothetical protein                                                                                      |
| 2064 | -1.80 | 8.41E-09 | <i>ntpD</i>  | V-type ATP synthase subunit D                                                                             |
| 1860 | -1.80 | 6.52E-08 | <i>rpsP</i>  | 30S ribosomal protein S16,BS17                                                                            |
| 908  | -1.80 | 3.85E-08 | <i>metW</i>  | methionine biosynthesis protein MetW,16S ribosomal RNA methyltransferase KsgA/Dim1 family protein         |
| 1212 | -1.79 | 5.04E-05 | <i>malG</i>  | ABC transporter permease,Maltose transport system permease protein malG                                   |
| 1130 | -1.77 | 7.43E-06 | -            | YitT family protein                                                                                       |
| 2868 | -1.77 | 1.02E-04 | <i>hssS</i>  | sensor histidine kinase                                                                                   |
| 1963 | -1.77 | 1.68E-05 | <i>chbF</i>  | alpha-galactosidase                                                                                       |
| 2558 | -1.77 | 2.13E-07 | -            | NlpC/P60 family lipoprotein,invasion associated secreted endopeptidase,Membrane-bound metallopeptidase    |
| 179  | -1.76 | 6.30E-04 | -            | integral membrane protein,Protein of unknown function (DUF1211)                                           |
| 2785 | -1.76 | 5.78E-06 | -            | Mobile element protein,Transposase                                                                        |
| 2109 | -1.75 | 1.66E-05 | <i>ecsA4</i> | ABC transporter ATP-binding protein                                                                       |
| 436  | -1.75 | 8.99E-08 | <i>agrA1</i> | response regulator receiver domain-containing protein                                                     |
| 162  | -1.75 | 2.57E-08 | -            | DNA alkylation repair protein                                                                             |
| 1918 | -1.74 | 3.46E-08 | <i>yidC</i>  | putative OxaA-like protein,Membrane protein YidC                                                          |
| 2873 | -1.74 | 2.36E-04 | <i>panC</i>  | pantoate-beta-alanine ligase                                                                              |
| 1942 | -1.73 | 5.84E-08 | <i>glyS</i>  | glycyl-tRNA synthetase subunit beta                                                                       |
| 1211 | -1.73 | 1.18E-04 | <i>ycjO1</i> | ABC transporter permease                                                                                  |
| 1216 | -1.73 | 5.36E-08 | <i>xpt</i>   | xanthine phosphoribosyltransferase                                                                        |
| 837  | -1.72 | 4.95E-07 | -            | helix-turn-helix domain-containing protein                                                                |
| 2758 | -1.72 | 1.09E-08 | <i>rplM</i>  | 50S ribosomal protein L13                                                                                 |
| 2746 | -1.71 | 2.11E-07 | <i>iolC</i>  | 5-dehydro-2-deoxygluconokinase                                                                            |
| 1102 | -1.71 | 2.24E-08 | -            | P-ATPase superfamily cation transporter,Calcium-transporting ATPase                                       |
| 1953 | -1.70 | 2.21E-05 | -            | ISEnf3, transposase,                                                                                      |
| 2076 | -1.70 | 1.44E-07 | <i>ecsA3</i> | ABC transporter ATP-binding protein                                                                       |
| 905  | -1.70 | 2.88E-08 | -            | membrane protein,Lipid A core - O-antigen ligase and related enzymes                                      |
| 1546 | -1.70 | 4.18E-07 | -            | hypothetical protein                                                                                      |

|      |       |          |              |                                                                                                   |
|------|-------|----------|--------------|---------------------------------------------------------------------------------------------------|
| 1735 | -1.69 | 1.10E-03 | <i>yqgQ</i>  | DUF910 family protein,hypothetical protein                                                        |
| 736  | -1.69 | 3.87E-06 | <i>glcR</i>  | DeoR family transcriptional regulator,HTH-type transcriptional repressor glcR                     |
| 1088 | -1.69 | 6.59E-09 | -            | calcium-translocating P-type ATPase,,magnesium-transporting ATPase MgtA                           |
| 1295 | -1.69 | 6.12E-08 | <i>dtpT</i>  | amino acid/peptide transporter,Di-/tripeptide transporter                                         |
| 343  | -1.67 | 6.30E-08 | <i>paiA</i>  | GNAT family acetyltransferase,Protease synthase and sporulation negative regulatory protein PAI 1 |
| 2152 | -1.67 | 3.30E-08 | <i>pepC</i>  | Aminopeptidase C                                                                                  |
| 3103 | -1.67 | 1.69E-06 | <i>vanX2</i> | D-alanyl-D-alanine dipeptidase                                                                    |
| 2479 | -1.67 | 2.32E-07 | -            | Cna B-type,Predicted outer membrane protein                                                       |
| 3023 | -1.67 | 5.25E-04 | -            | hypothetical protein                                                                              |
| 1577 | -1.66 | 3.95E-06 | -            | membrane protein,Protein of unknown function (DUF1294)                                            |
| 1925 | -1.66 | 2.14E-05 | <i>tagE</i>  | group 1 glycosyl transferase,Probable poly(glycerol-phosphate) alpha-glucosyltransferase          |
| 250  | -1.66 | 1.68E-07 | <i>rpmI</i>  | 50S ribosomal protein L35                                                                         |
| 2122 | -1.66 | 2.81E-07 | <i>adaA</i>  | methyltransferase,ubiquinone/menaquinone biosynthesis methyltransferase                           |
| 1148 | -1.66 | 3.07E-07 | <i>ylqF</i>  | ribosome biogenesis GTP-binding protein                                                           |
| 2347 | -1.66 | 1.46E-07 | <i>rplK</i>  | 50S ribosomal protein L11                                                                         |
| 152  | -1.65 | 3.76E-07 | <i>glal</i>  | glycerol uptake facilitator protein,Glyceroaquaporin                                              |
| 926  | -1.65 | 2.54E-07 | -            | ISEnfa3, transposase                                                                              |
| 907  | -1.65 | 3.67E-08 | <i>tagH</i>  | ABC transporter ATP-binding protein,Teichoic acids export ATP-binding protein TagH                |
| 2449 | -1.65 | 1.88E-06 | <i>uxaC</i>  | glucuronate isomerase                                                                             |
| 2541 | -1.64 | 1.05E-08 | <i>lysS</i>  | lysyl-tRNA synthetase                                                                             |
| 1859 | -1.64 | 2.99E-07 | -            | RNA-binding protein                                                                               |
| 1542 | -1.64 | 2.57E-04 | -            | alcohol dehydrogenase                                                                             |
| 2882 | -1.63 | 2.43E-07 | <i>macB2</i> | macrolide-specific efflux protein MacB                                                            |
| 2821 | -1.62 | 8.22E-08 | -            | RNA-binding protein,R3H domain                                                                    |
| 1083 | -1.62 | 1.07E-02 | -            | hypothetical protein                                                                              |
| 1685 | -1.62 | 2.11E-07 | <i>ldcA</i>  | Murein tetrapeptide carboxypeptidase                                                              |
| 2862 | -1.62 | 2.75E-07 | -            | ISEnfa3, transposase                                                                              |
| 1119 | -1.62 | 9.01E-06 | -            | ferredoxin                                                                                        |
| 1970 | -1.62 | 7.66E-07 | <i>yneF</i>  | protein YneF,hypothetical protein                                                                 |
| 1092 | -1.61 | 4.09E-07 | -            | hypothetical protein                                                                              |
| 1962 | -1.61 | 6.71E-06 | -            |                                                                                                   |
| 904  | -1.61 | 1.96E-07 | -            | YkoY family integral membrane protein                                                             |
| 3040 | -1.61 | 2.36E-07 | -            | ISEnfa3, transposase                                                                              |
| 1966 | -1.61 | 8.36E-04 | <i>bglG1</i> | transcriptional antiterminator                                                                    |
| 1045 | -1.61 | 1.24E-04 | <i>araD</i>  | L-ribulose-5-phosphate 4-epimerase                                                                |
| 2445 | -1.60 | 1.38E-05 | <i>ypdC2</i> | AraC family transcriptional regulator                                                             |
| 2065 | -1.60 | 2.65E-08 | <i>ntpB</i>  | V-type ATP synthase subunit B                                                                     |
| 251  | -1.60 | 9.10E-08 | <i>rplT1</i> | 50S ribosomal protein L20                                                                         |
| 2480 | -1.60 | 1.53E-04 | -            | putative site-specific integrase-resolvase                                                        |
| 836  | -1.60 | 1.02E-05 | -            | putative Zn peptidase,Domain of unknown function (DUF955)                                         |
| 249  | -1.60 | 8.56E-08 | <i>infC</i>  | translation initiation factor IF-3                                                                |

|      |       |          |               |                                                                                                  |
|------|-------|----------|---------------|--------------------------------------------------------------------------------------------------|
| 1824 | -1.60 | 6.45E-07 | -             | ISEnfa3, transposase                                                                             |
| 2108 | -1.60 | 6.15E-06 | -             | ABC superfamily ATP binding cassette transporter, membrane protein                               |
| 1570 | -1.59 | 1.16E-02 | <i>xerC6</i>  | Phage integrase, Tyrosine recombinase XerC                                                       |
| 1042 | -1.59 | 4.64E-04 | <i>ulaB2</i>  | PTS system ascorbate-specific transporter subunit IIB                                            |
| 1576 | -1.59 | 1.19E-06 | -             | integral membrane protein, conserved hypothetical protein                                        |
| 2497 | -1.59 | 2.64E-03 | -             | putative holin                                                                                   |
| 1107 | -1.59 | 4.73E-07 | <i>fur</i>    | ferric (Fe) uptake regulator                                                                     |
| 1397 | -1.59 | 2.66E-05 | <i>pyrE</i>   |                                                                                                  |
| 1807 | -1.58 | 1.18E-07 | -             | ISEnfa3, transposase                                                                             |
| 2572 | -1.58 | 4.20E-07 | -             | ISEnfa3, transposase                                                                             |
| 750  | -1.58 | 1.66E-07 | <i>yaaT</i>   | stage 0 sporulation protein YaaT                                                                 |
| 2928 | -1.58 | 2.52E-08 | <i>bglF6</i>  | PTS system, sucrose-specific IIA, IIB, IIC component                                             |
| 78   | -1.58 | 6.75E-08 | <i>gpmA1</i>  | phosphoglycerate mutase                                                                          |
| 1738 | -1.58 | 7.35E-06 | <i>fhuG</i>   | ferrichrome transport system permease FhuG                                                       |
| 2294 | -1.57 | 1.50E-06 | <i>araR</i>   | GntR family transcriptional regulator, Arabinose metabolism transcriptional repressor            |
| 647  | -1.57 | 2.51E-08 | <i>ltaS11</i> | sulfatase, Lipoteichoic acid synthase 1                                                          |
| 1158 | -1.57 | 4.09E-07 | <i>plsY</i>   | acyl-phosphate glycerol 3-phosphate acyltransferase                                              |
| 2557 | -1.57 | 2.19E-06 | <i>pepF1</i>  | oligoendopeptidase PepF/M3 family                                                                |
| 2822 | -1.56 | 5.41E-08 | <i>misCA</i>  | pheromone cCF10 precursor/lipoprotein, 60 kDa, Stage III sporulation protein J                   |
| 1043 | -1.56 | 4.10E-05 | <i>sgbH</i>   | 3-dehydro-L-gulonate-6-phosphate decarboxylase                                                   |
| 15   | -1.56 | 1.81E-07 | <i>ykpA</i>   | ABC transporter ATP-binding protein                                                              |
| 1167 | -1.56 | 1.49E-06 | -             | integral membrane protein, hypothetical protein                                                  |
| 1871 | -1.56 | 2.48E-07 | -             | hypothetical protein                                                                             |
| 2909 | -1.56 | 2.82E-08 | -             | PEP phosphonmutase family protein                                                                |
| 163  | -1.55 | 2.65E-08 | -             | HAD superfamily hydrolase, Putative bifunctional phosphatase/peptidyl-prolyl cis-trans isomerase |
| 1626 | -1.55 | 4.99E-07 | <i>ccpA2</i>  | LacI family transcriptional regulator, Catabolite control protein                                |
| 1866 | -1.55 | 3.45E-06 | -             | DUF523 family protein, Uncharacterized conserved protein                                         |
| 1745 | -1.55 | 5.74E-08 | <i>asnB</i>   | asparagine synthetase B                                                                          |
| 2116 | -1.55 | 3.23E-06 | <i>ugl1</i>   | family 88 glycosyl hydrolase, Unsaturated glucuronyl hydrolase                                   |
| 2635 | -1.55 | 6.15E-08 | <i>azlC</i>   | azaleucine resistance protein AzlC, Inner membrane protein YgaZ                                  |
| 817  | -1.55 | 6.88E-08 | <i>ileS</i>   | isoleucyl-tRNA synthetase                                                                        |
| 1302 | -1.55 | 8.13E-07 | <i>pheT2</i>  | phenylalanyl-tRNA synthetase subunit beta                                                        |
| 1734 | -1.54 | 1.84E-03 | <i>glcK</i>   | glucokinase                                                                                      |
| 2823 | -1.54 | 1.41E-07 | <i>rnpA</i>   | Ribonuclease P protein component                                                                 |
| 1544 | -1.53 | 1.22E-03 | <i>gnd2</i>   | phosphogluconate dehydrogenase (decarboxylating)                                                 |
| 903  | -1.53 | 3.69E-07 | <i>rmlD</i>   | dTDP-4-dehydrorhamnose reductase                                                                 |
| 2467 | -1.53 | 1.56E-07 | <i>rluB2</i>  | 16S rRNA pseudouridylate synthase A                                                              |
| 2071 | -1.53 | 9.69E-09 | <i>ntpI</i>   | V-type ATP synthase subunit I                                                                    |
| 2504 | -1.52 | 1.37E-02 | -             | ISEnfa3, transposase                                                                             |
| 2489 | -1.52 | 1.77E-07 | -             | radical SAM protein family, coproporphyrinogen III oxidase                                       |
| 36   | -1.52 | 1.78E-06 | -             | Transposase and inactivated derivatives                                                          |

|      |       |          |              |                                                                                                             |
|------|-------|----------|--------------|-------------------------------------------------------------------------------------------------------------|
| 1321 | -1.52 | 7.65E-07 | <i>obg</i>   | GTPase obg,Spo0B-associated GTP-binding protein                                                             |
| 2356 | -1.52 | 6.19E-07 | <i>queT2</i> | integral membrane protein,Queuosine precursor ECF transporter S component QueT                              |
| 401  | -1.52 | 4.77E-06 | -            | PadR family transcriptional regulator                                                                       |
| 2067 | -1.52 | 7.07E-08 | <i>ntpG</i>  | V-type ATP synthase subunit G                                                                               |
| 1233 | -1.52 | 4.96E-07 | -            | AraC family transcriptional regulator                                                                       |
| 959  | -1.51 | 2.13E-07 | <i>ptsI</i>  | phosphoenolpyruvate-protein phosphotransferase                                                              |
| 1864 | -1.51 | 5.56E-07 | <i>ffh</i>   | signal recognition particle subunit FFH/SRP54 (srp54)                                                       |
| 2939 | -1.51 | 2.50E-07 | -            | Uncharacterized conserved protein,secondary thiamine-phosphate synthase enzyme                              |
| 1116 | -1.51 | 1.05E-08 | -            | C4-dicarboxylate anaerobic carrier                                                                          |
| 1543 | -1.50 | 2.37E-05 | <i>serA2</i> | phosphoglycerate dehydrogenase                                                                              |
| 607  | -1.50 | 7.04E-08 | -            | Helix-turn-helix domain protein                                                                             |
| 2068 | -1.50 | 2.61E-08 | <i>ntpC</i>  | V-type ATPase subunit C,V-type sodium pump subunit C                                                        |
| 2210 | -1.50 | 1.78E-07 | -            | ABC transporter ATP-binding protein/permease,Putative multidrug export ATP-binding/permease protein SAV1866 |
| 1307 | -1.49 | 1.13E-06 | <i>artQ</i>  | ABC transporter permease,Arginine transport system permease protein ArtQ                                    |
| 386  | -1.49 | 1.75E-06 | <i>tyrS1</i> | tyrosyl-tRNA synthetase                                                                                     |
| 2120 | -1.49 | 7.98E-04 | <i>ugpA2</i> | ABC transporter permease,sn-glycerol-3-phosphate transport system permease protein ugpA                     |
| 2463 | -1.49 | 8.14E-04 | -            | integral membrane protein                                                                                   |
| 340  | -1.49 | 7.50E-04 | -            | Predicted kinase,Zeta toxin                                                                                 |
| 2144 | -1.49 | 3.25E-07 | <i>iscS2</i> | pyridoxal phosphate-dependent transferase,Cysteine desulfurase                                              |
| 1643 | -1.49 | 1.35E-04 | -            | hypothetical protein                                                                                        |
| 2072 | -1.48 | 7.38E-08 | -            | V-type ATP synthase subunit G                                                                               |
| 2069 | -1.48 | 1.77E-07 | -            | V-type ATPase subunit E                                                                                     |
| 1967 | -1.48 | 4.81E-04 | <i>bglG2</i> | transcriptional antiterminator                                                                              |
| 673  | -1.47 | 1.25E-06 | -            | ABC transporter protein,ABC-type transport system involved in multi-copper enzyme maturation                |
| 1235 | -1.47 | 6.24E-08 | <i>ytfQ</i>  | LacI family transcriptional regulator                                                                       |
| 2293 | -1.47 | 2.23E-03 | <i>csbC</i>  | MFS transporter, sugar porter family protein                                                                |
| 2712 | -1.47 | 1.20E-02 | -            | ISEnfa3, transposase                                                                                        |
| 1149 | -1.47 | 2.11E-06 | <i>rnhB</i>  | ribonuclease HII                                                                                            |
| 455  | -1.47 | 2.37E-07 | <i>efp</i>   | translation elongation factor P                                                                             |
| 674  | -1.47 | 2.61E-07 | <i>ecsA2</i> | ABC transporter ATP-binding protein                                                                         |
| 2070 | -1.46 | 5.98E-08 | <i>ntpK</i>  | proton (H <sup>+</sup> ) or sodium (Na <sup>+</sup> ) translocating V-type ATPase                           |
| 1198 | -1.46 | 5.19E-05 | <i>dcuS2</i> | two-component sensor histidine kinase                                                                       |
| 1773 | -1.46 | 1.07E-06 | <i>srrA1</i> | response regulator receiver domain-containing protein                                                       |
| 958  | -1.45 | 1.69E-08 | <i>ptsH</i>  | phosphocarrier protein HPr                                                                                  |
| 1217 | -1.45 | 7.39E-08 | <i>ygfU</i>  | xanthine permease                                                                                           |
| 618  | -1.45 | 1.57E-03 | -            | ISEnfa3, transposase                                                                                        |
| 2417 | -1.45 | 1.94E-06 | <i>trmB</i>  |                                                                                                             |
| 1317 | -1.44 | 7.86E-08 | -            | alpha3-beta1 integrin-binding family protein                                                                |
| 1828 | -1.44 | 3.23E-04 | -            | ISEnfa3, transposase                                                                                        |
| 2884 | -1.44 | 8.17E-05 | -            | IS1167 transposase                                                                                          |
| 2941 | -1.44 | 1.14E-06 | <i>gatC3</i> | PTS system galactitol-specific transporter subunit IIC                                                      |

|      |       |          |              |                                                                                                                   |
|------|-------|----------|--------------|-------------------------------------------------------------------------------------------------------------------|
| 2636 | -1.44 | 1.07E-06 | -            | branched-chain amino acid transport protein,Predicted membrane protein                                            |
| 2940 | -1.44 | 1.17E-06 | -            | PTS system galactitol-specific transporter subunit IIB                                                            |
| 1924 | -1.44 | 4.84E-06 | <i>rfbX2</i> | PST family polysaccharide transporter,Polysaccharide biosynthesis protein                                         |
| 999  | -1.43 | 6.12E-08 | <i>pfkA</i>  | 6-phosphofructokinase                                                                                             |
| 1296 | -1.43 | 3.69E-03 | -            | transposase                                                                                                       |
| 1564 | -1.43 | 2.95E-02 | <i>fabG4</i> | short chain dehydrogenase/reductase family oxidoreductase                                                         |
| 1183 | -1.43 | 8.08E-06 | -            | cell wall protein,chromosome segregation protein                                                                  |
| 1880 | -1.43 | 2.02E-02 | -            | ISEnfa3, transposase                                                                                              |
| 169  | -1.42 | 1.46E-06 | <i>treB</i>  | PTS system trehalose(maltose)-specific transporter subunits IIBC                                                  |
| 391  | -1.42 | 2.55E-06 | <i>ccpA1</i> | LacI family transcriptional regulator,Catabolite control protein                                                  |
| 236  | -1.42 | 9.39E-04 | <i>siaT</i>  | TRAP dicarboxylate transporter subunit DctM,Neu5Ac permease,L-dehydroascorbate transporter large permease subunit |
| 1910 | -1.42 | 4.69E-08 | <i>dacA</i>  | D-alanyl-D-alanine carboxypeptidase                                                                               |
| 1558 | -1.42 | 1.22E-03 | -            | PTS system glucitol/sorbitol-specific transporter subunit IIA                                                     |
| 199  | -1.42 | 6.09E-07 | <i>udk</i>   | uridine kinase                                                                                                    |
| 1456 | -1.42 | 2.50E-05 | -            | hypothetical protein                                                                                              |
| 1772 | -1.42 | 1.78E-07 | <i>phoR2</i> | sensor histidine kinase,Alkaline phosphatase synthesis sensor protein phoR                                        |
| 2945 | -1.42 | 9.01E-06 | -            | hypothetical protein                                                                                              |
| 2946 | -1.42 | 2.11E-06 | -            | circular bacteriocin                                                                                              |
| 1109 | -1.42 | 1.49E-07 | <i>xerD1</i> | site-specific recombinase XerD,Tyrosine recombinase                                                               |
| 1429 | -1.41 | 9.37E-05 | -            | efflux ABC transporter permease,FtsX-like permease family                                                         |
| 1319 | -1.41 | 4.55E-06 | -            | x-Pro dipeptidyl-peptidase,Thermostable monoacylglycerol lipase                                                   |
| 707  | -1.41 | 1.17E-04 | <i>puuR</i>  | helix-turn-helix domain-containing protein                                                                        |
| 788  | -1.41 | 6.64E-04 | -            | transposase                                                                                                       |
| 160  | -1.41 | 1.51E-06 | <i>rpsD</i>  | SSU ribosomal protein S4P                                                                                         |
| 1774 | -1.41 | 4.38E-05 | -            | integral membrane protein                                                                                         |
| 392  | -1.41 | 5.50E-05 | <i>mro</i>   | aldose 1-epimerase                                                                                                |
| 2290 | -1.41 | 2.62E-04 | <i>araA2</i> | L-arabinose isomerase                                                                                             |
| 1610 | -1.41 | 2.95E-04 | <i>ycjP2</i> | ABC transporter permease                                                                                          |
| 1248 | -1.41 | 2.42E-04 | -            | transposase                                                                                                       |
| 1396 | -1.40 | 5.63E-06 | <i>pyrF</i>  | Orotidine 5'-phosphate decarboxylase                                                                              |
| 1446 | -1.39 | 9.84E-07 | -            | hypothetical protein                                                                                              |
| 2584 | -1.39 | 7.34E-07 | <i>purR2</i> | pur operon repressor                                                                                              |
| 2066 | -1.39 | 2.64E-06 | <i>ntpA</i>  | V-type ATP synthase subunit A                                                                                     |
| 441  | -1.39 | 6.69E-07 | <i>dukA</i>  | deoxynucleoside kinase                                                                                            |
| 2346 | -1.39 | 1.03E-06 | <i>rplA</i>  | 50S ribosomal protein L1                                                                                          |
| 2874 | -1.38 | 1.09E-06 | <i>panD</i>  | aspartate alpha-decarboxylase                                                                                     |
| 2195 | -1.38 | 1.67E-06 | <i>iadA</i>  | beta-aspartyl peptidase                                                                                           |
| 1301 | -1.38 | 1.43E-06 | <i>pheS2</i> | phenylalanyl-tRNA synthetase subunit alpha                                                                        |
| 2943 | -1.37 | 7.76E-07 | <i>licR6</i> | Transcriptional antiterminator                                                                                    |
| 729  | -1.37 | 1.51E-06 | <i>fba2</i>  | fructose-bisphosphate aldolase                                                                                    |

|      |       |          |              |                                                                                       |
|------|-------|----------|--------------|---------------------------------------------------------------------------------------|
| 1110 | -1.36 | 1.78E-06 | -            | GNAT family acetyltransferase,ribosomal-protein-alanine acetyltransferase             |
| 293  | -1.35 | 1.11E-07 | <i>ermG</i>  | rRNA adenine N-6-methyltransferase                                                    |
| 1313 | -1.35 | 1.46E-06 | <i>ilvE</i>  | branched-chain-amino-acid transaminase                                                |
| 1239 | -1.35 | 1.38E-07 | <i>guaC</i>  | GMP reductase                                                                         |
| 231  | -1.35 | 3.28E-07 | <i>aad</i>   | aldehyde-alcohol dehydrogenase                                                        |
| 1818 | -1.35 | 1.62E-04 | <i>nifA</i>  | PTS system transcriptional activator                                                  |
| 1258 | -1.35 | 2.31E-07 | <i>ylbL</i>  | S16 family peptidase                                                                  |
| 789  | -1.35 | 5.64E-08 | <i>pepQ1</i> | Xaa-Pro dipeptidase                                                                   |
| 1650 | -1.35 | 5.48E-05 | -            | hypothetical protein                                                                  |
| 484  | -1.34 | 9.35E-05 | -            | LysM domain-containing protein                                                        |
| 2418 | -1.34 | 8.44E-07 | -            | Phosphotransferase,thiamine kinase,Phosphotransferase enzyme family                   |
| 804  | -1.34 | 2.75E-07 | <i>mraW</i>  | S-adenosyl-methyltransferase MraW                                                     |
| 2490 | -1.34 | 1.02E-06 | -            | rRNA methylase family protein                                                         |
| 2644 | -1.33 | 4.18E-06 | <i>arlR2</i> | response regulator receiver domain protein                                            |
| 2386 | -1.32 | 6.09E-06 | <i>yfiC</i>  | methyltransferase small domain-containing protein                                     |
| 1700 | -1.32 | 1.28E-07 | <i>rimP</i>  | ribosome maturation protein RimP                                                      |
| 1557 | -1.31 | 7.72E-04 | <i>fsaA</i>  | fructose-6-phosphate aldolase                                                         |
| 2810 | -1.31 | 7.27E-08 | <i>serS2</i> | seryl-tRNA synthetase                                                                 |
| 1312 | -1.31 | 2.53E-06 | <i>mscS</i>  | transporter, small conductance mechanosensitive ion channel family protein            |
| 805  | -1.31 | 9.08E-07 | <i>ftsL</i>  | cell division protein                                                                 |
| 2143 | -1.31 | 2.80E-07 | <i>thiI</i>  | thiamine biosynthesis protein ThiI                                                    |
| 564  | -1.31 | 2.86E-05 | -            | hypothetical protein                                                                  |
| 3102 | -1.31 | 5.58E-06 | -            | D-alanyl-D-alanine carboxypeptidase                                                   |
| 1498 | -1.31 | 5.42E-04 | <i>nanE</i>  | N-acetylmannosamine-6-phosphate 2-epimerase                                           |
| 624  | -1.30 | 4.32E-06 | -            | sensor histidine kinase                                                               |
| 2348 | -1.30 | 6.09E-07 | <i>sdhB</i>  | L-serine dehydratase iron-sulfur-dependent subunit beta                               |
| 1339 | -1.30 | 1.36E-03 | -            | transposase                                                                           |
| 802  | -1.29 | 1.74E-03 | -            | transposase                                                                           |
| 1197 | -1.29 | 1.69E-03 | <i>dcuS1</i> | sensor histidine kinase                                                               |
| 1111 | -1.29 | 2.69E-07 | <i>scpA</i>  | segregation and condensation protein A                                                |
| 2270 | -1.29 | 1.46E-02 | -            | ABC-2 family transporter protein                                                      |
| 2488 | -1.28 | 2.65E-06 | <i>bcrC</i>  | PAP2 family protein,Undecaprenyl-diphosphatase BcrC                                   |
| 2477 | -1.28 | 2.16E-06 | -            | membrane protein                                                                      |
| 1365 | -1.28 | 4.08E-07 | <i>ypwA</i>  | carboxypeptidase Taq metallopeptidase                                                 |
| 2396 | -1.27 | 1.38E-07 | <i>relA2</i> | GTP diphosphokinase,Bifunctional (p)ppGpp synthase/hydrolase RelA                     |
| 1112 | -1.27 | 1.82E-06 | <i>scpB</i>  | segregation and condensation protein B                                                |
| 711  | -1.27 | 2.98E-06 | <i>potD</i>  | spermidine/putrescine-binding periplasmic protein PotD                                |
| 2366 | -1.27 | 2.12E-05 | <i>trmL</i>  | SpoU family RNA methyltransferase                                                     |
| 273  | -1.27 | 6.15E-05 | <i>rlmH</i>  | ribosomal RNA large subunit methyltransferase H                                       |
| 1548 | -1.27 | 3.60E-04 | <i>fms7</i>  | LPXTG family cell surface protein<br>Fms7,Esterase/lipase,Alpha/beta hydrolase family |
| 1736 | -1.27 | 1.54E-03 | <i>gluP</i>  | S54 family peptidase,Rhomboid protease gluP                                           |
| 368  | -1.26 | 2.88E-06 | -            | integral membrane protein                                                             |



|      |       |          |              |                                                                                   |
|------|-------|----------|--------------|-----------------------------------------------------------------------------------|
| 3021 | -1.26 | 4.12E-04 | -            | Phage lysin, Mannosyl-glycoprotein endo-beta-N-acetylglucosaminidase              |
| 1733 | -1.26 | 3.68E-05 | <i>yibN</i>  | rhodanese family protein, hypothetical protein                                    |
| 1257 | -1.26 | 5.51E-05 | <i>coaD</i>  | Phosphopantetheine adenylyltransferase CoaD                                       |
| 1965 | -1.26 | 2.24E-05 | <i>bglF5</i> | PTS system beta-glucoside-specific IIBC component                                 |
| 1493 | -1.26 | 5.50E-07 | <i>psr</i>   | LytR family transcriptional regulator                                             |
| 1151 | -1.26 | 3.72E-07 | <i>topA</i>  | DNA topoisomerase TopA                                                            |
| 1819 | -1.25 | 7.72E-05 | <i>gmuE1</i> | fructokinase                                                                      |
| 2395 | -1.25 | 1.79E-07 | <i>dtd</i>   | D-tyrosyl-tRNA(Tyr) deacylase                                                     |
| 1256 | -1.25 | 9.48E-06 | <i>rsmD</i>  | RsmD family RNA methyltransferase                                                 |
| 728  | -1.25 | 1.51E-07 | <i>pyrG</i>  | CTP synthetase                                                                    |
| 2942 | -1.25 | 1.14E-06 | -            | PTS system galactitol-specific transporter subunit IIA                            |
| 170  | -1.24 | 3.17E-07 | <i>treR</i>  | GntR family transcriptional regulator, Trehalose operon transcriptional repressor |
| 316  | -1.24 | 1.66E-04 | <i>gmuC2</i> | PTS system lactose/cellobiose-specific transporter subunit IIC                    |
| 487  | -1.24 | 1.47E-06 | <i>thiO</i>  | FAD dependent oxidoreductase, Glycine oxidase                                     |
| 687  | -1.24 | 6.04E-06 | <i>ung</i>   | uracil-DNA glycosylase                                                            |
| 944  | -1.24 | 4.18E-08 | <i>lytR1</i> | transcriptional regulator, Membrane-bound protein lytR                            |
| 990  | -1.24 | 1.56E-07 | <i>thrS</i>  | threonyl-tRNA synthetase                                                          |
| 1373 | -1.22 | 1.32E-07 | <i>cshB</i>  | DEAD-box ATP dependent DNA helicase                                               |
| 1276 | -1.22 | 2.13E-07 | <i>yitW</i>  | metal-sulfur cluster biosynthetic enzyme                                          |
| 546  | -1.22 | 1.41E-06 | <i>yeiH</i>  | membrane protein                                                                  |
| 2063 | -1.22 | 2.66E-08 | <i>ntpJ</i>  | V-type sodium ATP synthase subunit J                                              |
| 1647 | -1.22 | 7.77E-06 | -            | hypothetical protein                                                              |
| 3101 | -1.22 | 8.03E-04 | <i>vanZ2</i> | teicoplanin resistance protein VanZ                                               |
| 67   | -1.21 | 4.29E-06 | <i>degA1</i> | LacI family transcriptional regulator, Degradation activator                      |
| 627  | -1.21 | 1.55E-03 | -            | transposase                                                                       |
| 1445 | -1.21 | 1.96E-07 | <i>clpX1</i> | ATP-dependent protease ATP-binding subunit ClpX                                   |
| 954  | -1.21 | 1.47E-06 | <i>prfC</i>  | peptide chain release factor 3                                                    |
| 1115 | -1.21 | 1.10E-07 | <i>fmnP</i>  | membrane protein, Riboflavin ECF transporter S component FmnP                     |
| 1002 | -1.21 | 2.68E-06 | -            | nucleic acid-binding protein, Uncharacterized ACR, COG1399                        |
| 2509 | -1.21 | 9.70E-06 | <i>bmr31</i> | MFS family major facilitator transporter, drug resistance transporter             |
| 710  | -1.21 | 1.48E-05 | <i>potC</i>  | spermidine/putrescine transport system permease protein PotC                      |
| 2142 | -1.20 | 4.39E-03 | <i>rex2</i>  | redox-sensing transcriptional repressor Rex                                       |
| 3065 | -1.20 | 5.34E-06 | <i>repB1</i> | plasmid replication initiation protein                                            |
| 1305 | -1.20 | 4.34E-05 | <i>peb1A</i> | putative adhesin/ABC transporter aspartate/glutamate-binding protein              |
| 2061 | -1.20 | 2.57E-04 | -            | ornithine cyclodeaminase/mu-crystallin family protein                             |
| 1298 | -1.20 | 5.44E-08 | <i>addA</i>  | ATP-dependent helicase/nuclease subunit A                                         |
| 2411 | -1.20 | 2.13E-02 | -            | Late competence protein ComGE                                                     |
| 2456 | -1.20 | 4.91E-06 | -            | fructokinase                                                                      |
| 2643 | -1.20 | 1.98E-06 | -            | sensor histidine kinase                                                           |
| 148  | -1.20 | 5.98E-03 | -            | M protein trans-acting positive regulator, Mga helix-turn-helix domain            |

|      |       |          |              |                                                                                                                                                                                                                                                                                                          |
|------|-------|----------|--------------|----------------------------------------------------------------------------------------------------------------------------------------------------------------------------------------------------------------------------------------------------------------------------------------------------------|
| 1822 | -1.20 | 1.11E-04 | -            | glycoside hydrolase family 32                                                                                                                                                                                                                                                                            |
| 360  | -1.19 | 2.83E-05 | <i>glp2</i>  | glycerol uptake facilitator protein,Glyceroaquaporin                                                                                                                                                                                                                                                     |
| 803  | -1.19 | 2.22E-06 | <i>mraZ</i>  | cell division protein MraZ                                                                                                                                                                                                                                                                               |
| 1648 | -1.19 | 5.85E-07 | -            | RDD family protein                                                                                                                                                                                                                                                                                       |
| 2361 | -1.19 | 1.81E-05 | -            | sensor histidine kinase                                                                                                                                                                                                                                                                                  |
| 1594 | -1.19 | 2.14E-06 | -            | SprT-like family protein                                                                                                                                                                                                                                                                                 |
| 1152 | -1.19 | 1.72E-07 | -            | tRNA (uracil-5-)-methyltransferase                                                                                                                                                                                                                                                                       |
| 2201 | -1.19 | 7.43E-06 | -            | ComE operon protein 2,tRNA-specific adenosine deaminase                                                                                                                                                                                                                                                  |
| 233  | -1.18 | 5.11E-02 | -            | TRAP dicarboxylate transporter subunit DctP                                                                                                                                                                                                                                                              |
| 1347 | -1.18 | 5.95E-02 | -            | recombination factor protein RarA                                                                                                                                                                                                                                                                        |
| 2713 | -1.18 | 1.34E-04 | -            | ISEnfa3, transposase                                                                                                                                                                                                                                                                                     |
| 1701 | -1.18 | 5.99E-08 | <i>polC2</i> | DNA polymerase III PolC-type                                                                                                                                                                                                                                                                             |
| 1219 | -1.18 | 2.25E-07 | -            | phosphoribosylaminoimidazole carboxylase ATPase subunit                                                                                                                                                                                                                                                  |
| 3042 | -1.17 | 4.53E-06 | -            | hypothetical protein                                                                                                                                                                                                                                                                                     |
| 1297 | -1.17 | 1.83E-07 | <i>addB</i>  | ATP-dependent helicase/deoxyribonuclease subunit B                                                                                                                                                                                                                                                       |
| 2211 | -1.17 | 1.19E-06 | <i>folT2</i> | integral membrane protein,Folate ECF transporter S component FolT                                                                                                                                                                                                                                        |
| 263  | -1.17 | 7.17E-04 | -            | transposase                                                                                                                                                                                                                                                                                              |
| 1571 | -1.17 | 3.18E-07 | <i>lepA</i>  | GTP-binding protein LepA                                                                                                                                                                                                                                                                                 |
| 1306 | -1.16 | 2.90E-04 | <i>glnP2</i> | ABC transporter permease,Glutamine transport system permease protein glnP,amino acid ABC transporter permease,ABC-type amino acid transport system, permease component,ectoine/hydroxyectoine ABC transporter, permease protein EhuD,Binding-protein-dependent transport system inner membrane component |
| 2867 | -1.16 | 1.90E-07 | <i>mprA2</i> | DNA-binding response regulator                                                                                                                                                                                                                                                                           |
| 1460 | -1.16 | 5.15E-05 | <i>nupC2</i> | Na dependent nucleoside transporter                                                                                                                                                                                                                                                                      |
| 2723 | -1.15 | 1.01E-01 | <i>rpmF2</i> | 50S ribosomal protein L32                                                                                                                                                                                                                                                                                |
| 1777 | -1.15 | 1.35E-03 | -            | transposase                                                                                                                                                                                                                                                                                              |
| 1433 | -1.15 | 2.13E-05 | -            | DNA integrase,Integrase core domain                                                                                                                                                                                                                                                                      |
| 984  | -1.15 | 2.36E-07 | <i>yeeN</i>  | conserved hypothetical protein TIGR01033,Probable transcriptional regulatory protein YeeN                                                                                                                                                                                                                |
| 1000 | -1.15 | 7.58E-07 | -            | pyruvate kinase                                                                                                                                                                                                                                                                                          |
| 2769 | -1.15 | 4.70E-03 | <i>ycjP7</i> | ABC transporter permease                                                                                                                                                                                                                                                                                 |
| 342  | -1.15 | 2.34E-07 | <i>yybA</i>  | MarR family transcriptional regulator                                                                                                                                                                                                                                                                    |
| 467  | -1.15 | 8.20E-05 | -            | DNA integrase,Integrase core domain                                                                                                                                                                                                                                                                      |
| 129  | -1.14 | 1.32E-05 | <i>yejE</i>  | ABC transporter permease                                                                                                                                                                                                                                                                                 |
| 1699 | -1.14 | 6.83E-08 | <i>nusA</i>  | transcription elongation factor NusA                                                                                                                                                                                                                                                                     |
| 660  | -1.14 | 6.36E-05 | <i>nhaC2</i> | Na <sup>+</sup> /H <sup>+</sup> antiporter,Sodium/proton antiporter                                                                                                                                                                                                                                      |
| 1547 | -1.14 | 1.56E-03 | -            | Acetyl esterase                                                                                                                                                                                                                                                                                          |
| 752  | -1.14 | 4.64E-06 | -            | tetrapyrrole methylase family protein                                                                                                                                                                                                                                                                    |
| 2012 | -1.14 | 4.29E-05 | <i>yigZ</i>  | protein co-occurring with transport system                                                                                                                                                                                                                                                               |
| 1697 | -1.13 | 6.56E-07 | -            | 50S ribosomal protein L7Ae,hypothetical protein,Ribosomal protein L30E,Ribosomal protein L7Ae/L30e/S12e/Gadd45 family                                                                                                                                                                                    |
| 544  | -1.13 | 3.05E-06 | -            | glycosyl transferase family protein                                                                                                                                                                                                                                                                      |
| 2387 | -1.13 | 3.92E-05 | -            | GIY-YIG nuclease superfamily protein                                                                                                                                                                                                                                                                     |
| 237  | -1.13 | 8.14E-03 | -            | ISEnfa3, transposase                                                                                                                                                                                                                                                                                     |

|      |       |          |              |                                                                                |
|------|-------|----------|--------------|--------------------------------------------------------------------------------|
| 1457 | -1.13 | 6.41E-05 | -            | ATP-dependent Zn protease                                                      |
| 2923 | -1.12 | 1.06E-02 | -            | transposase, IS200 family                                                      |
| 2925 | -1.12 | 6.12E-06 | -            | DNA integrase,Integrase core domain                                            |
| 1492 | -1.12 | 2.24E-07 | -            | penicillin binding protein transpeptidase domain protein                       |
| 2478 | -1.12 | 3.62E-07 | <i>sdrD</i>  | Cna B-type,Serine-aspartate repeat-containing protein D precursor              |
| 1879 | -1.11 | 1.18E-03 | -            | ISEnfa3, transposase                                                           |
| 2917 | -1.11 | 1.92E-05 | -            | PTS system transporter subunit IIA                                             |
| 1737 | -1.11 | 2.01E-03 | -            | 5-formyltetrahydrofolate cyclo-ligase                                          |
| 370  | -1.11 | 1.47E-06 | -            | glycosyl transferase family protein                                            |
| 1108 | -1.11 | 1.70E-03 | -            | hypothetical protein                                                           |
| 920  | -1.10 | 6.57E-05 | -            | IS204/IS1001/IS1096/IS1165 transposase                                         |
| 2180 | -1.10 | 3.94E-05 | -            | rRNA (cytosine-C(5)-)-methyltransferase                                        |
| 2336 | -1.10 | 6.69E-07 | <i>yhhT4</i> | pheromone autoinducer 2 transporter                                            |
| 806  | -1.10 | 7.38E-07 | -            | peptidoglycan glycosyltransferase,Penicillin-binding protein 2X                |
| 1113 | -1.10 | 8.79E-06 | -            | 16S rRNA pseudouridine synthase A                                              |
| 1549 | -1.10 | 2.12E-04 | -            | isochorismatase family hydrolase                                               |
| 2571 | -1.10 | 3.02E-06 | -            | guanylate kinase                                                               |
| 2613 | -1.09 | 2.00E-06 | -            | hypothetical protein                                                           |
| 80   | -1.09 | 6.84E-07 | -            | ribose-5-phosphate isomerase                                                   |
| 2959 | -1.09 | 8.41E-07 | -            | putative transcriptional regulator                                             |
| 1351 | -1.09 | 6.13E-03 | -            | hypothetical protein                                                           |
| 2638 | -1.09 | 1.49E-06 | -            | tRNA-dihydrouridine synthase                                                   |
| 2725 | -1.09 | 4.45E-07 | -            | ABC transporter ATP-binding protein/permease                                   |
| 378  | -1.08 | 1.28E-03 | -            | transposase                                                                    |
| 2847 | -1.08 | 2.02E-03 | -            | metallophosphoesterase                                                         |
| 2275 | -1.08 | 3.86E-06 | -            | beta-lactamase                                                                 |
| 884  | -1.08 | 2.59E-03 | -            | ISEnfa3, transposase                                                           |
| 827  | -1.08 | 1.06E-06 | -            | PTS system lactose/cellobiose-specific transporter subunit IIC                 |
| 2958 | -1.08 | 1.53E-06 | -            | Nucleotidyl transferase of unknown function (DUF1814)                          |
| 3044 | -1.07 | 9.41E-07 | -            | mannosyl-glycoprotein endo-beta-N-acetylglucosaminidase                        |
| 1304 | -1.07 | 4.60E-05 | -            | ABC transporter ATP-binding protein                                            |
| 2918 | -1.07 | 1.85E-04 | -            | PTS system transporter subunit IIBC                                            |
| 2306 | -1.07 | 1.66E-05 | <i>mta</i>   | MerR family transcriptional regulator,Multidrug transporter activation protein |
| 2924 | -1.07 | 5.28E-05 | -            | transposase family protein                                                     |
| 964  | -1.07 | 6.05E-07 | -            | excinuclease ABC                                                               |
| 2349 | -1.07 | 1.80E-07 | -            | L-serine dehydratase iron-sulfur-dependent subunit alpha                       |
| 1350 | -1.07 | 1.29E-04 | <i>xerD2</i> | phage integrase,Tyrosine recombinase XerD                                      |
| 1829 | -1.07 | 5.86E-04 | -            | Integrase core domain protein                                                  |
| 1364 | -1.06 | 3.32E-06 | -            | putative methylase,Ribosomal RNA large subunit methyltransferase L             |
| 2773 | -1.06 | 2.53E-06 | <i>purR3</i> | LacI family transcriptional regulator                                          |
| 2119 | -1.06 | 7.05E-03 | <i>ycjP4</i> | ABC transporter permease                                                       |
| 1249 | -1.06 | 1.97E-06 | -            | ATP-dependent DNA helicase RecQ                                                |

|      |       |          |              |                                                                                                                                                                                                                                                              |
|------|-------|----------|--------------|--------------------------------------------------------------------------------------------------------------------------------------------------------------------------------------------------------------------------------------------------------------|
| 1649 | -1.06 | 1.02E-06 | -            | signal peptide peptidase SppA                                                                                                                                                                                                                                |
| 2902 | -1.05 | 4.94E-03 | -            | ISEnfa3, transposase, Transposase and inactivated derivatives, Transposase                                                                                                                                                                                   |
| 763  | -1.05 | 5.09E-05 | -            | M42 glutamyl aminopeptidase                                                                                                                                                                                                                                  |
| 413  | -1.05 | 1.08E-05 | <i>gltC1</i> | LysR family transcriptional regulator                                                                                                                                                                                                                        |
| 2956 | -1.05 | 8.44E-07 | <i>ssb2</i>  | single-strand binding protein                                                                                                                                                                                                                                |
| 1769 | -1.05 | 7.25E-04 | -            | transposase                                                                                                                                                                                                                                                  |
| 2203 | -1.05 | 4.10E-05 | -            | PTS system mannose/fructose/sorbose-specific IID component                                                                                                                                                                                                   |
| 1578 | -1.05 | 4.41E-06 | -            | diacylglycerol kinase catalytic subunit                                                                                                                                                                                                                      |
| 1562 | -1.04 | 1.16E-02 | -            | glucitol operon activator protein, DNA-binding transcriptional activator GutM, Glucitol operon activator, Glucitol operon activator protein (GutM)                                                                                                           |
| 638  | -1.04 | 1.61E-04 | -            | hypothetical protein                                                                                                                                                                                                                                         |
| 2570 | -1.04 | 5.11E-06 | -            | DNA-directed RNA polymerase subunit omega                                                                                                                                                                                                                    |
| 1420 | -1.04 | 1.12E-05 | -            | BglG family transcriptional antiterminator, Ascorbate-specific phosphotransferase enzyme IIA component                                                                                                                                                       |
| 2058 | -1.04 | 1.21E-03 | -            | NUDIX family hydrolase, NADH pyrophosphatase                                                                                                                                                                                                                 |
| 1823 | -1.04 | 1.91E-06 | <i>scrR</i>  | sucrose operon repressor ScrR, Degradation activator, DNA-binding transcriptional repressor PurR, ABC-type sugar transport system, periplasmic component, catabolite control protein A, Periplasmic binding proteins and sugar binding domain of LacI family |
| 1923 | -1.04 | 1.63E-02 | -            | VanZ-like protein, Predicted integral membrane protein                                                                                                                                                                                                       |
| 751  | -1.04 | 4.84E-05 | <i>yabA</i>  | DNA replication initiation control protein YabA                                                                                                                                                                                                              |
| 1220 | -1.04 | 4.27E-07 | -            | adenylosuccinate lyase                                                                                                                                                                                                                                       |
| 2768 | -1.03 | 6.90E-03 | -            | oxidoreductase zinc-binding dehydrogenase family protein                                                                                                                                                                                                     |
| 2427 | -1.03 | 1.20E-03 | -            | HAD-superfamily hydrolase, Uncharacterized phosphatase YwpJ                                                                                                                                                                                                  |
| 632  | -1.03 | 7.95E-05 | <i>licT2</i> | BglG family transcriptional antiterminator                                                                                                                                                                                                                   |
| 2494 | -1.03 | 4.94E-04 | -            | transposase                                                                                                                                                                                                                                                  |
| 2219 | -1.02 | 5.32E-07 | <i>steT2</i> | APC family amino acid transporter, Serine/threonine exchanger SteT                                                                                                                                                                                           |
| 1646 | -1.02 | 2.88E-07 | -            | peptidyl-prolyl cis-trans isomerase                                                                                                                                                                                                                          |
| 2485 | -1.02 | 2.51E-07 | -            | leucyl-tRNA synthetase                                                                                                                                                                                                                                       |
| 1652 | -1.01 | 4.09E-07 | -            | glucosamine-fructose-6-phosphate aminotransferase                                                                                                                                                                                                            |
| 764  | -1.01 | 1.13E-05 | -            | integral membrane protein                                                                                                                                                                                                                                    |
| 1085 | -1.01 | 9.23E-07 | -            | cardiolipin synthetase                                                                                                                                                                                                                                       |
| 994  | -1.01 | 1.96E-06 | -            | HAD superfamily hydrolase, Phosphatase YidA                                                                                                                                                                                                                  |
| 1196 | -1.01 | 1.71E-02 | <i>dcuR</i>  | response regulator receiver domain-containing protein                                                                                                                                                                                                        |
| 2362 | -1.01 | 1.68E-04 | <i>vraR2</i> | LuxR family DNA-binding response regulator, Response regulator protein vraR                                                                                                                                                                                  |
| 2929 | -1.00 | 3.87E-06 | -            | fructokinase                                                                                                                                                                                                                                                 |
| 1936 | -1.00 | 5.47E-06 | -            | protein-tyrosine-phosphatase                                                                                                                                                                                                                                 |

42 \*Locus\_tag: identifier corresponding to reference genome sequence, prefix to all  
43 numbers listed is "RBWH1\_", \*\*logFC: log<sub>2</sub> fold change, \*\*\*FDR: false discovery  
44 rate.
