# Supplementary material for: Chemical Synergy between Ionophore PBT2 and Zinc Reverses Antibiotic Resistance
Source: PubMed Central journal article supplement (PMC6299484; doi:10.1128/mbio.02391-18), 2018-12-11
Supplement: mbo006184211st3.pdf [file mbo006184211st3.pdf]

47 **Supplementary Table 3.** Real-time PCR primers used in this study.

| <b>GAS</b>    |                  |                        |
|---------------|------------------|------------------------|
| Gene          | Primer direction | Primer sequence 5'->3' |
| <i>proS</i>   | Fwd              | AGCTGATCTCTGGCGTGAAT   |
| <i>proS</i>   | Rev              | GGGTACGAAGCAAGCCATTA   |
| <i>mtsA</i>   | Fwd              | CAATCGGTCAAGACCCTCAT   |
| <i>mtsA</i>   | Rev              | CCATCAGACACGGCAAAGTA   |
| <i>czcD</i>   | Fwd              | ATTGCACTTTGCACCATGAA   |
| <i>czcD</i>   | Rev              | ACCATCCATCGACCAAACAT   |
| <i>glnA</i>   | Fwd              | TGGATCAGGGATGCACTGTA   |
| <i>glnA</i>   | Rev              | CCCAAGCGACATAAACAGGT   |
| <i>copA</i>   | Fwd              | TCGAAGCTTTGCATCAACTG   |
| <i>copA</i>   | Rev              | GAGCGGAGGTCTGCTATCAC   |
| <i>dacC</i>   | Fwd              | AACACGCCAGCTTATGCTCT   |
| <i>dacC</i>   | Rev              | CCTGATGCTGCCACAAGTAA   |
| <i>AdcB</i>   | Fwd              | ATGGCGGTAGTTGCCATTAG   |
| <i>AdcB</i>   | Rev              | CAAAATCGCCGTTGAAATCT   |
| <i>mgA</i>    | Fwd              | CTGCCGCTACGACAACAAA    |
| <i>mgA</i>    | Rev              | CCCGTTGGTGAGTCTTGTTT   |
| <b>MRSA</b>   |                  |                        |
| Gene          | Primer direction | Primer sequence 5'->3' |
| <i>rrsA</i>   | Fwd              | GAAAGCCACGGCTAACTACG   |
| <i>rrsA</i>   | Rev              | CATTCACCGCTACACATGG    |
| <i>znuC</i>   | Fwd              | CCGTTTGTTCGGAATTGATTT  |
| <i>znuC</i>   | Rev              | TGCTCCTTTGACTAGGGTCAC  |
| <i>zntA</i>   | Fwd              | CGGTGTAAATGATGCACCTG   |
| <i>zntA</i>   | Rev              | TAGCCGAATGCCCAAATAG    |
| <i>copZ</i>   | Fwd              | GAGCTGTGGTCACTGCAAAA   |
| <i>copZ</i>   | Rev              | CCTTGATCTTCAATTGCGTCT  |
| <i>sek</i>    | Fwd              | CATTTATGGACATAACGGCACT |
| <i>sek</i>    | Rev              | TTGGTAACCCATCATCTCCTG  |
| <i>glnA</i>   | Fwd              | AAAATGCACGCGGATTTACT   |
| <i>glnA</i>   | Rev              | GGGTTTGCAGCTGGATCTAC   |
| <i>frmA</i>   | Fwd              | TTGGGGATATCAGGTTTTGC   |
| <i>frmA</i>   | Rev              | TCCCGCTAGTTTAGCTCCAA   |
| <i>czcD</i>   | Fwd              | G TTCAGTTGGCGCCATTACT  |
| <i>czcD</i>   | Rev              | ACATGGCAATCATGCACACT   |
| <b>VRE</b>    |                  |                        |
| Gene          | Primer direction | Primer sequence 5'->3' |
| <i>23S</i>    | Fwd              | CTGCATTCCTTAGCCTCCTG   |
| <i>23S</i>    | Rev              | CTAAGGTTTCCTGGGGAAGG   |
| <i>glnA</i>   | Fwd              | CCGTTATTTGGGATCAATGG   |
| <i>glnA</i>   | Rev              | TAGGCACGAGCATGTTTCAG   |
| <i>mntB_2</i> | Fwd              | CGACTGTCGCCGAAATAAAT   |

|               |     |                      |
|---------------|-----|----------------------|
| <i>mntB</i> 2 | Rev | AAAAGCAATGGGGATGAATG |
| <i>copA</i>   | Fwd | TCGGAACAAAAATCCCTGAG |
| <i>copA</i>   | Rev | AAAAGAATCCGGATGACACG |
| <i>hyl</i>    | Fwd | TGGGAAAGAGATGGAGATGG |
| <i>hyl</i>    | Rev | AAATAGCTGGCATCGCTGTT |
| <i>ssaB</i> 2 | Fwd | TCTTGGTATTAGCCGGTTGC |
| <i>ssaB</i> 2 | Rev | ATCGCTTGCCTTTTTGATGT |
| <i>zosA</i>   | Fwd | ATTGTGCTTCCTTCGTGTCC |
| <i>zosA</i>   | Rev | CAGCCGCTTCTTTAGGTGTC |
| <i>dps</i>    | Fwd | CCTGCAACAAGTGTTTCAA  |
| <i>dps</i>    | Rev | TACATTGCACCCAATGATGG |
